# Supplementary material
Source: PubMed Central journal article supplement (PMC3367518)
Supplement: cr201231x2.pdf [file cr201231x2.pdf]

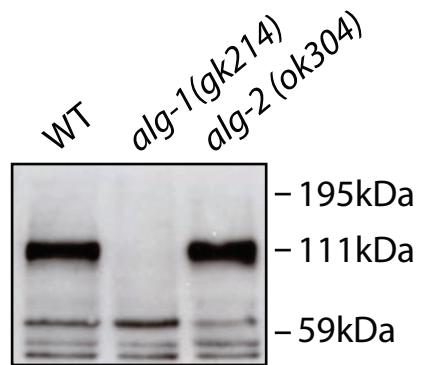

**Supplementary information, Figure S2** Specificity of the ALG-1 specific polyclonal antibody. The presence of ALG-1 has been monitored in protein extracts from population of wild-type animals (WT), *alg-2 (ok304)* and *alg-1 (gk214)* mutants using anti-ALG-1 affinity purified polyclonal antibody. ALG-1 (~110 kDa) is specifically detected in WT and *alg-2* extracts. Unspecific bands are observed around 60kDa.
