# Supplementary material
Source: PubMed Central journal article supplement (PMC3367518)
Supplement: cr201231x3.pdf [file cr201231x3.pdf]

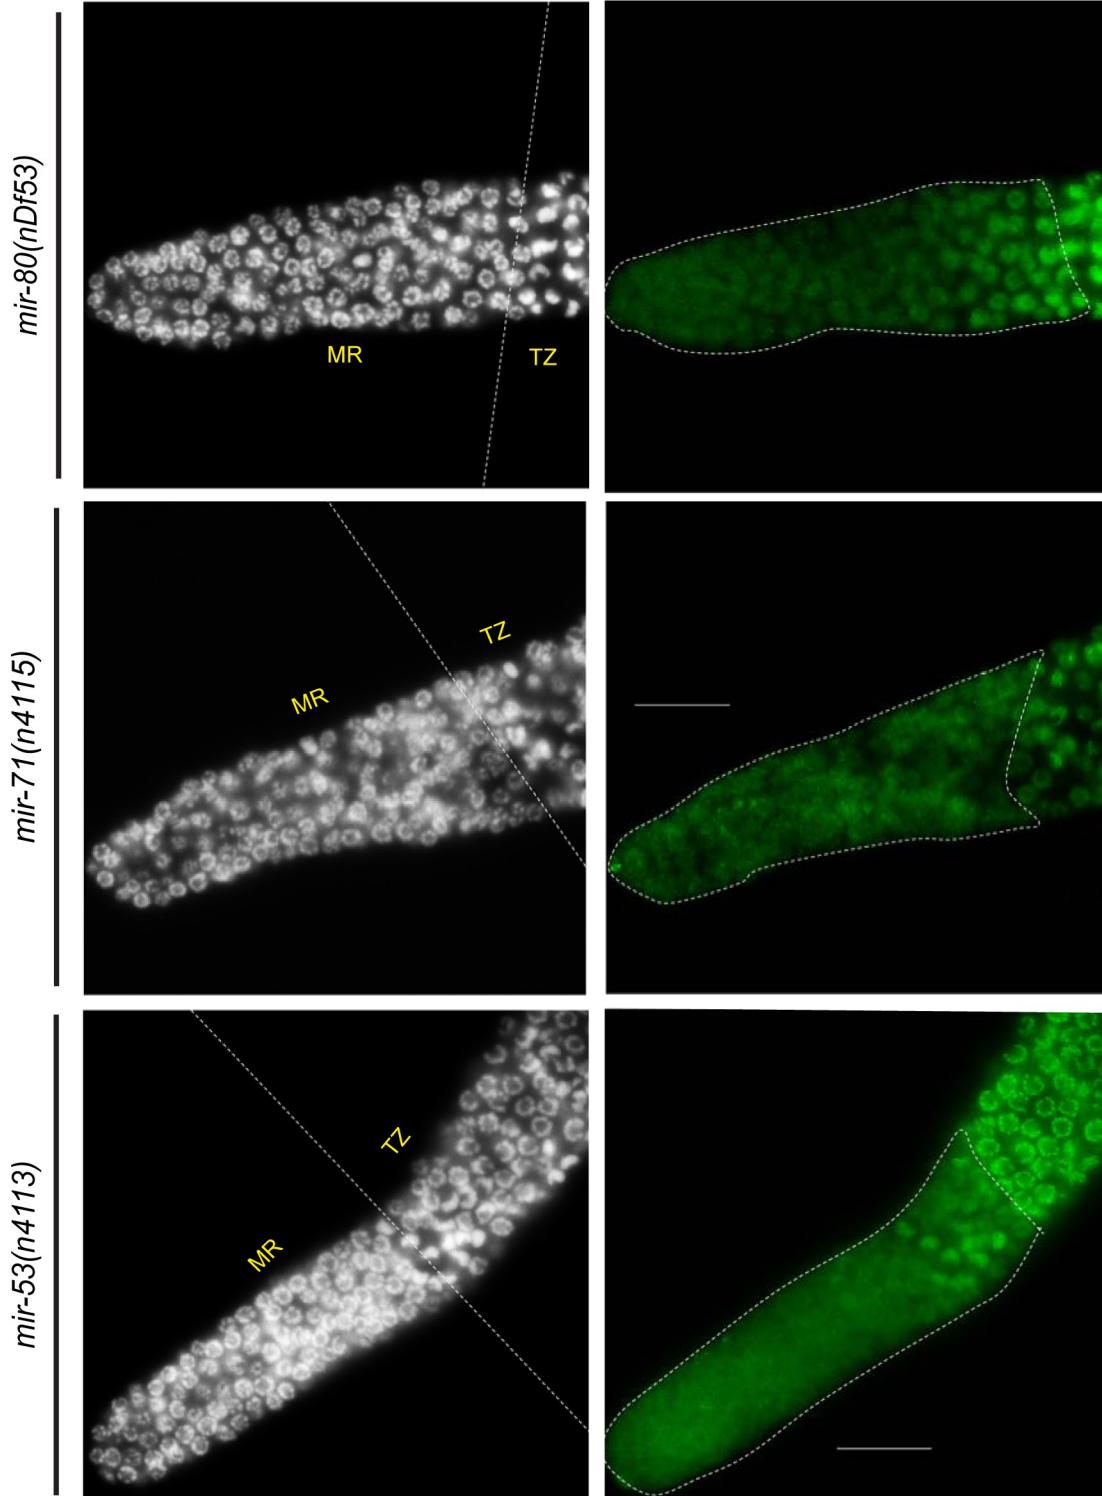

**Supplementary information, Figure S3** Set of miRNA mutants with no apparent germline phenotypes. DAPI and HIM-3 staining depicting mitotic region and entry into meiosis in *mir-80*, *mir-71* and *mir-53* mutant animals. Scale bar measure 20 $\mu$ m.
