# Supplementary material
Source: PubMed Central journal article supplement (PMC3367518)
Supplement: cr201231x4.pdf [file cr201231x4.pdf]

**Supplementary information, Table S1** The list of genes that is mis-regulated in *alg-1 (gk214)* gonads. Only genes with a threshold of more than 2 fold change and a  $p \leq 0.001$  when compared to wild-type gonads are listed in this table.

Bukhari et al, Supplemental Table 1

| Probe name   | PrimaryAccession | Description                                                     | WBGeneID        | log2 (Fold change) | Symmetrical raw fold change | T statistic | P-value |
|--------------|------------------|-----------------------------------------------------------------|-----------------|--------------------|-----------------------------|-------------|---------|
| A_12_P105523 | VT23B5.2         | FYVE zinc finger [VT23B5.2]                                     | WBGene00007752  | -3.49              | -11.26                      | -15.37      | 2.7E-06 |
| A_12_P108253 | Y9D1A.2          |                                                                 | WBGene000021187 | -2.98              | -7.90                       | -8.88       | 7.9E-05 |
| A_12_P112875 | Y46H3C.5         |                                                                 | WBGene000021605 | -2.91              | -7.51                       | -10.54      | 2.8E-05 |
| A_12_P106708 | R05D3.4          |                                                                 | WBGene00007008  | -2.77              | -6.82                       | -6.88       | 3.5E-04 |
| A_12_P105550 | C16A3.8          |                                                                 | WBGene00015813  | -2.75              | -6.72                       | -8.70       | 8.9E-05 |
| A_12_P116831 | H27M09.5         |                                                                 | WBGene00019248  | -2.69              | -6.47                       | -7.35       | 2.4E-04 |
| A_12_P102607 | F30A10.10.2      | ubiquitin carboxyl-terminal hydrolase [F30A10.10.2]             | WBGene00009267  | -2.68              | -6.42                       | -10.30      | 3.2E-05 |
| A_12_P104195 | K07C5.6.1        | Zinc finger, CCHC class [K07C5.6.1]                             | WBGene00010629  | -2.64              | -6.25                       | -7.95       | 1.5E-04 |
| A_12_P115882 | F28B3.7.3        |                                                                 | WBGene00001860  | -2.64              | -6.24                       | -8.67       | 9.1E-05 |
| A_12_P109477 | T08G11.1a        | nucleotide binding protein [T08G11.1a]                          | WBGene00011629  | -2.62              | -6.16                       | -9.55       | 5.1E-05 |
| A_12_P103819 | T04H1.4          | DNA repair protein RAD50 like [T04H1.4]                         | WBGene00004296  | -2.62              | -6.16                       | -10.72      | 2.5E-05 |
| A_12_P104809 | C16A3.7.2        | human NFX1; D. melanogaster shuttle craft protein [C16A3.7.2]   | WBGene00007048  | -2.57              | -5.93                       | -6.20       | 6.4E-04 |
| A_12_P106577 | C02F4.1          | DOCK180 protein [C02F4.1]                                       | WBGene00000419  | -2.57              | -5.92                       | -7.26       | 2.6E-04 |
| A_12_P114441 | D1022.7a         |                                                                 | WBGene00000101  | -2.55              | -5.85                       | -8.07       | 1.4E-04 |
| A_12_P115034 | C07G1.5.2        |                                                                 | WBGene00004101  | -2.53              | -5.76                       | -6.41       | 5.3E-04 |
| A_12_P115814 | Y45F10C.1        |                                                                 | WBGene00012877  | -2.51              | -5.70                       | -6.29       | 5.8E-04 |
| A_12_P119129 | C25H3.8          |                                                                 | WBGene00016117  | -2.50              | -5.64                       | -12.39      | 1.0E-05 |
| A_12_P108815 | ZK593.4          | Human XE169 like [ZK593.4]                                      | WBGene00004319  | -2.47              | -5.54                       | -9.06       | 7.0E-05 |
| A_12_P107093 | ZK1098.1         | WW/rsp5/WWP domain containing proteins (2 domains) [ZK1098.1]   | WBGene00014218  | -2.46              | -5.50                       | -8.13       | 1.3E-04 |
| A_12_P102620 | C44E4.2          |                                                                 | WBGene00016651  | -2.46              | -5.50                       | -7.24       | 2.6E-04 |
| A_12_P104797 | C17F3.3          |                                                                 | WBGene00015908  | -2.44              | -5.44                       | -5.81       | 9.1E-04 |
| A_12_P111681 | C07H6.4          | Probable RNA binding protein [C07H6.4]                          | WBGene00015581  | -2.44              | -5.43                       | -5.81       | 9.1E-04 |
| A_12_P106415 | C27A2.1          |                                                                 | WBGene00016151  | -2.44              | -5.42                       | -6.45       | 5.1E-04 |
| A_12_P114507 | C02F5.1          |                                                                 | WBGene00002231  | -2.43              | -5.40                       | -6.00       | 7.6E-04 |
| A_12_P118439 | K07H8.10.1       | RNA-binding protein [K07H8.10.1]                                | WBGene00019510  | -2.43              | -5.37                       | -5.96       | 7.9E-04 |
| A_12_P118371 | B0464.2          | TPR Domain [B0464.2]                                            | WBGene00007184  | -2.42              | -5.37                       | -9.00       | 7.3E-05 |
| A_12_P112904 | Y9D1A.1          |                                                                 | WBGene00021186  | -2.39              | -5.24                       | -13.23      | 7.0E-06 |
| A_12_P103812 | T08B2.5c         |                                                                 | WBGene00020346  | -2.38              | -5.19                       | -5.92       | 8.2E-04 |
| A_12_P101406 | C27F2.8          |                                                                 | WBGene00016170  | -2.36              | -5.12                       | -7.53       | 2.1E-04 |
| A_12_P119693 | C14A4.4a         | autoantigen PM-SCL [C14A4.4a]                                   | WBGene00000796  | -2.34              | -5.06                       | -6.00       | 7.7E-04 |
| A_12_P113728 | Y13C8A.1         |                                                                 | WBGene00021188  | -2.32              | -4.99                       | -9.85       | 4.2E-05 |
| A_12_P109551 | F35G12.3a        | serine/threonine kinase [F35G12.3a]                             | WBGene00004762  | -2.32              | -4.98                       | -7.89       | 1.6E-04 |
| A_12_P113616 | W04D2.6b         | RNA recognition motif. (aka RRM, RBD, or RNP domain) [W04D2.6a] | WBGene00012245  | -2.32              | -4.98                       | -7.83       | 1.7E-04 |
| A_12_P111712 | ZK1055.1         |                                                                 | WBGene00001829  | -2.32              | -4.98                       | -6.55       | 4.7E-04 |
| A_12_P102331 | T05H10.1         | ubiquitin carboxyl-terminal hydrolase [T05H10.1]                | WBGene00011507  | -2.31              | -4.96                       | -6.64       | 4.3E-04 |
| A_12_P108248 | ZK546.14b        |                                                                 | WBGene00022765  | -2.31              | -4.95                       | -7.25       | 2.6E-04 |
| A_12_P118310 | F28C1.1          |                                                                 | WBGene00009200  | -2.29              | -4.89                       | -6.59       | 4.5E-04 |
| A_12_P110002 | R31.1            | spectrin beta chain [R31.1]                                     | WBGene00004855  | -2.28              | -4.85                       | -7.37       | 2.4E-04 |
| A_12_P102733 | C03B8.4          | Zinc finger [C03B8.4]                                           | WBGene00003002  | -2.28              | -4.85                       | -6.25       | 6.1E-04 |
| A_12_P101698 | F10E7.8          |                                                                 | WBGene00017349  | -2.28              | -4.85                       | -6.45       | 5.1E-04 |
| A_12_P112024 | T01G1.1.3        | kinensin-like protein [T01G1.1.3]                               | WBGene00002223  | -2.27              | -4.84                       | -9.47       | 5.4E-05 |
| A_12_P115429 | F55H2.6.2        |                                                                 | WBGene00000550  | -2.27              | -4.83                       | -5.83       | 8.9E-04 |
| A_12_P106038 | F25E5.1.2        |                                                                 | WBGene00017782  | -2.27              | -4.83                       | -8.80       | 8.3E-05 |
| A_12_P109421 | C07A9.3b         | serine/threonine kinase [C07A9.3a]                              | WBGene00006579  | -2.26              | -4.80                       | -7.21       | 2.7E-04 |
| A_12_P100390 | T04A8.14         | S1 RNA binding domain [T04A8.14]                                | WBGene00001259  | -2.26              | -4.80                       | -8.47       | 1.0E-04 |
| A_12_P116104 | ZK1127.9a        |                                                                 | WBGene00022855  | -2.26              | -4.77                       | -6.26       | 6.0E-04 |
| A_12_P116305 | T05E8.3.1        | helicase [T05E8.3.1]                                            | WBGene00020263  | -2.25              | -4.77                       | -7.22       | 2.7E-04 |
| A_12_P114657 | F19F10.9         |                                                                 | WBGene00017605  | -2.25              | -4.77                       | -8.79       | 8.4E-05 |
| A_12_P110323 | Y24F12A.3        |                                                                 | WBGene00012499  | -2.25              | -4.76                       | -7.34       | 2.4E-04 |
| A_12_P117631 | F18C12.2b        | DnaJ domain [F18C12.2b]                                         | WBGene00004378  | -2.24              | -4.71                       | -6.14       | 6.7E-04 |
| A_12_P104085 | W03A3.2          | DNA polymerase [W03A3.2]                                        | WBGene00020964  | -2.23              | -4.69                       | -6.01       | 7.6E-04 |
| A_12_P115941 | K12H4.8          | dead box helicase [K12H4.8]                                     | WBGene00000939  | -2.23              | -4.69                       | -7.72       | 1.8E-04 |
| A_12_P101756 | F55G1.4          |                                                                 | WBGene00018900  | -2.22              | -4.66                       | -6.39       | 5.4E-04 |
| A_12_P105262 | F33G12.5         |                                                                 | WBGene00018017  | -2.22              | -4.66                       | -9.37       | 5.7E-05 |
| A_12_P110094 | F01G4.1.2        | SNF2alpha like [F01G4.1.2]                                      | WBGene00004204  | -2.22              | -4.64                       | -7.75       | 1.8E-04 |
| A_12_P103174 | R07G3.3b         | myosin heavy chain [R07G3.3a]                                   | WBGene00019940  | -2.20              | -4.61                       | -10.13      | 3.6E-05 |
| A_12_P101913 | F22D6.5          | serine/threonine kinase [F22D6.5]                               | WBGene00004186  | -2.20              | -4.60                       | -6.38       | 5.4E-04 |
| A_12_P107299 | ZK1127.6.2       |                                                                 | WBGene00022853  | -2.20              | -4.58                       | -6.50       | 4.9E-04 |
| A_12_P116412 | C47D12.1b.1      |                                                                 | WBGene00007028  | -2.19              | -4.55                       | -9.92       | 4.1E-05 |
| A_12_P109839 | C50C3.6          |                                                                 | WBGene00004187  | -2.18              | -4.55                       | -6.42       | 5.2E-04 |
| A_12_P105814 | ZK632.2          | Coiled coil protein [ZK632.2]                                   | WBGene00014011  | -2.18              | -4.54                       | -6.83       | 3.7E-04 |
| A_12_P114185 | T05G5.9b         | Coiled coil protein [T05G5.9a]                                  | WBGene00011503  | -2.18              | -4.52                       | -6.90       | 3.5E-04 |
| A_12_P101856 | T13A10.1         |                                                                 | WBGene00020468  | -2.17              | -4.49                       | -6.93       | 3.4E-04 |

Bukhari et al, Supplemental Table 1

|              |              |                                                                                                             |                |       |       |        |         |
|--------------|--------------|-------------------------------------------------------------------------------------------------------------|----------------|-------|-------|--------|---------|
| A_12_P106576 | T21E12.4.1   | dynein heavy chain [T21E12.4.1]                                                                             | WBGene00000962 | -2.16 | -4.48 | -10.30 | 3.2E-05 |
| A_12_P103538 | F59A6.5      |                                                                                                             | WBGene00019087 | -2.16 | -4.48 | -6.05  | 7.3E-04 |
| A_12_P107575 | C54G10.2     | replication factor C 140 KD subunit like [C54G10.2]                                                         | WBGene00004337 | -2.15 | -4.44 | -5.77  | 9.4E-04 |
| A_12_P101181 | F26F12.7     | DNA helicase [F26F12.7]                                                                                     | WBGene00002637 | -2.15 | -4.44 | -7.53  | 2.1E-04 |
| A_12_P102246 | C45G3.1      | Actinin-type actin-binding domain containing proteins [C45G3.1]                                             | WBGene00008107 | -2.15 | -4.43 | -6.39  | 5.4E-04 |
| A_12_P108795 | C16A3.3      |                                                                                                             | WBGene00002850 | -2.13 | -4.39 | -10.59 | 2.7E-05 |
| A_12_P116045 | Y67D8C.5     |                                                                                                             | WBGene00002069 | -2.13 | -4.37 | -7.03  | 3.1E-04 |
| A_12_P101600 | D2096.12     |                                                                                                             | WBGene00017079 | -2.13 | -4.37 | -5.91  | 8.3E-04 |
| A_12_P104816 | F08H9.3      | heat shock protein [F08H9.3]                                                                                | WBGene00008591 | -2.12 | -4.35 | -5.94  | 8.1E-04 |
| A_12_P100778 | C44E4.1a     |                                                                                                             | WBGene00016650 | -2.11 | -4.32 | -12.95 | 8.0E-06 |
| A_12_P116119 | F42A9.2      | zinc-finger protein [F42A9.2]                                                                               | WBGene00003034 | -2.11 | -4.32 | -7.24  | 2.6E-04 |
| A_12_P100266 | R13F6.10     |                                                                                                             | WBGene00020068 | -2.11 | -4.31 | -6.73  | 4.0E-04 |
| A_12_P116702 | C09E7.7      |                                                                                                             | WBGene00015641 | -2.10 | -4.30 | -6.08  | 7.1E-04 |
| A_12_P100059 | T14G10.2b.2  | cell division control protein 25 like [T14G10.2a.1]                                                         | WBGene00004254 | -2.10 | -4.30 | -7.06  | 3.0E-04 |
| A_12_P109409 | C43E11.3a    |                                                                                                             | WBGene00016603 | -2.10 | -4.28 | -7.42  | 2.3E-04 |
| A_12_P109042 | F20D12.2     |                                                                                                             | WBGene00017642 | -2.10 | -4.28 | -10.78 | 2.4E-05 |
| A_12_P117316 | A_12_P117316 |                                                                                                             | WBGene00010502 | -2.09 | -4.26 | -6.20  | 6.4E-04 |
| A_12_P113982 | F10E9.8      |                                                                                                             | WBGene00004726 | -2.09 | -4.26 | -7.32  | 2.5E-04 |
| A_12_P102340 | F02E9.4.1    |                                                                                                             | WBGene00004117 | -2.09 | -4.26 | -9.64  | 4.8E-05 |
| A_12_P104818 | H37A05.2     |                                                                                                             | WBGene00010426 | -2.09 | -4.26 | -7.72  | 1.8E-04 |
| A_12_P109145 | T05A12.4.2   | helicase [T05A12.4.2]                                                                                       | WBGene00020235 | -2.09 | -4.25 | -8.59  | 9.6E-05 |
| A_12_P119003 | F59E12.9     |                                                                                                             | WBGene00019124 | -2.09 | -4.24 | -8.53  | 1.0E-04 |
| A_12_P101306 | F25G6.9      |                                                                                                             | WBGene00017800 | -2.08 | -4.23 | -5.85  | 8.8E-04 |
| A_12_P108324 | F27C1.6.2    |                                                                                                             | WBGene00017855 | -2.08 | -4.22 | -6.86  | 3.6E-04 |
| A_12_P108605 | F18E2.2.1    | ABC transporter [F18E2.2.1]                                                                                 | WBGene00006512 | -2.07 | -4.21 | -5.76  | 9.5E-04 |
| A_12_P116499 | F12F6.5      | chimaerin like [F12F6.5]                                                                                    | WBGene00006406 | -2.07 | -4.20 | -5.82  | 9.1E-04 |
| A_12_P116914 | R07E5.1      |                                                                                                             | WBGene00011109 | -2.06 | -4.16 | -8.14  | 1.3E-04 |
| A_12_P100618 | D1044.6      |                                                                                                             | WBGene00017031 | -2.05 | -4.15 | -5.77  | 9.4E-04 |
| A_12_P111953 | C53B4.4a     | PDZ domain (Also known as DHR or GLGF), Phorbol esters/diacylglycerol binding domain (C1 domain) [C53B4.4a] | WBGene00008274 | -2.05 | -4.15 | -7.44  | 2.2E-04 |
| A_12_P116696 | H19N07.2a    | ubiquitin carboxyl-terminal hydrolase [H19N07.2a]                                                           | WBGene00010406 | -2.05 | -4.14 | -6.21  | 6.3E-04 |
| A_12_P106926 | F46F11.1a    |                                                                                                             | WBGene00018508 | -2.05 | -4.14 | -6.94  | 3.3E-04 |
| A_12_P112915 | F54D5.14     |                                                                                                             | WBGene00010056 | -2.04 | -4.12 | -7.92  | 1.6E-04 |
| A_12_P105408 | F02H6.1      |                                                                                                             | WBGene00008534 | -2.04 | -4.10 | -6.44  | 5.1E-04 |
| A_12_P116756 | F35G12.8     | chromosome segregation protein [F35G12.8]                                                                   | WBGene00004874 | -2.03 | -4.08 | -11.24 | 1.9E-05 |
| A_12_P117931 | T06E4.3b.2   |                                                                                                             | WBGene00000226 | -2.03 | -4.08 | -9.27  | 6.1E-05 |
| A_12_P118031 | F39G3.3      |                                                                                                             | WBGene00018208 | -2.03 | -4.07 | -6.17  | 6.5E-04 |
| A_12_P120024 | C04G6.3.1    | phospholipase D [C04G6.3.1]                                                                                 | WBGene00004040 | -2.03 | -4.07 | -6.07  | 7.1E-04 |
| A_12_P115513 | B0041.7      | helicase [B0041.7]                                                                                          | WBGene00006961 | -2.02 | -4.06 | -7.38  | 2.4E-04 |
| A_12_P107001 | D2005.5      | RNA helicase like [D2005.5]                                                                                 | WBGene00008400 | -2.02 | -4.06 | -5.93  | 8.2E-04 |
| A_12_P103851 | K08F8.6      |                                                                                                             | WBGene00002295 | -2.01 | -4.02 | -8.22  | 1.3E-04 |
| A_12_P111438 | C33G3.6.1    |                                                                                                             | WBGene00007906 | -2.01 | -4.02 | -7.57  | 2.0E-04 |
| A_12_P114622 | R12E2.2.1    |                                                                                                             | WBGene00020031 | -2.01 | -4.02 | -5.93  | 8.1E-04 |
| A_12_P110762 | F27B3.5      |                                                                                                             | WBGene00017847 | -2.01 | -4.02 | -6.69  | 4.1E-04 |
| A_12_P115704 | ZK593.5      | dynactin [ZK593.5]                                                                                          | WBGene00001017 | -2.01 | -4.02 | -7.71  | 1.8E-04 |
| A_12_P103192 | C26C6.1.1    | HMG (high mobility group) box, Bromodomain (5 domains), Zinc finger, C2H2 type [C26C6.1.1]                  | WBGene00007042 | -2.00 | -4.01 | -9.08  | 6.9E-05 |
| A_12_P102805 | K03H1.2      | RNA helicase (DEAH subfamily) [K03H1.2]                                                                     | WBGene00003389 | -2.00 | -3.99 | -7.57  | 2.0E-04 |
| A_12_P102738 | C14C10.5     | Human mRNA (KIAA0077) product like [C14C10.5]                                                               | WBGene00007588 | -1.99 | -3.98 | -7.29  | 2.5E-04 |
| A_12_P113867 | R10E11.1b    | bromodomain [R10E11.1a]                                                                                     | WBGene00000366 | -1.98 | -3.96 | -8.49  | 1.0E-04 |
| A_12_P115392 | C27B7.4.1    | DNA repair protein [C27B7.4.1]                                                                              | WBGene00007761 | -1.98 | -3.95 | -8.97  | 7.4E-05 |
| A_12_P112871 | H06O01.2     | chromodomain-helicase-DNA-binding protein [H06O01.2]                                                        | WBGene00010369 | -1.98 | -3.94 | -9.50  | 5.3E-05 |
| A_12_P114748 | R12C12.8a    |                                                                                                             | WBGene00020028 | -1.96 | -3.90 | -7.54  | 2.1E-04 |
| A_12_P117681 | T17E9.1b     |                                                                                                             | WBGene00002201 | -1.96 | -3.90 | -6.49  | 4.9E-04 |
| A_12_P101662 | K10D2.1b     |                                                                                                             | WBGene00019627 | -1.95 | -3.87 | -6.22  | 6.3E-04 |
| A_12_P119370 | C26E6.9a     |                                                                                                             | WBGene00004782 | -1.94 | -3.84 | -7.22  | 2.7E-04 |
| A_12_P105300 | F44E7.4b     |                                                                                                             | WBGene00018426 | -1.93 | -3.80 | -6.19  | 6.4E-04 |
| A_12_P100663 | R10F2.6      |                                                                                                             | WBGene00019997 | -1.92 | -3.79 | -7.81  | 1.7E-04 |
| A_12_P109493 | K02B12.5     | ankyrin motif [K02B12.5]                                                                                    | WBGene00010498 | -1.92 | -3.78 | -7.72  | 1.8E-04 |
| A_12_P101568 | F31C3.3      |                                                                                                             | WBGene00009285 | -1.92 | -3.78 | -6.98  | 3.3E-04 |
| A_12_P112043 | B0280.12b    | Glutamate receptor [B0280.12a]                                                                              | WBGene00001613 | -1.92 | -3.78 | -6.34  | 5.6E-04 |
| A_12_P107193 | C01G5.2      |                                                                                                             | WBGene00004179 | -1.91 | -3.77 | -5.91  | 8.3E-04 |
| A_12_P117339 | H12C20.2a    | DNA mismatch repair protein (PMS2) [H12C20.2a]                                                              | WBGene00004064 | -1.91 | -3.77 | -6.81  | 3.7E-04 |
| A_12_P119131 | C38D4.3      |                                                                                                             | WBGene00003210 | -1.91 | -3.77 | -9.67  | 4.8E-05 |
| A_12_P113356 | C28C12.10    |                                                                                                             | WBGene00006450 | -1.91 | -3.76 | -6.64  | 4.3E-04 |
| A_12_P119138 | F21G4.6      |                                                                                                             | WBGene00009027 | -1.91 | -3.75 | -7.27  | 2.6E-04 |
| A_12_P102811 | Y79H2A.3a    |                                                                                                             | WBGene00013580 | -1.91 | -3.75 | -6.87  | 3.6E-04 |

Bukhari et al, Supplemental Table 1

|              |              |                                                 |                |       |       |        |         |
|--------------|--------------|-------------------------------------------------|----------------|-------|-------|--------|---------|
| A_12_P108004 | R05D3.11     |                                                 | WBGene00019883 | -1.90 | -3.73 | -6.08  | 7.1E-04 |
| A_12_P105849 | F08F8.9b     |                                                 | WBGene00017274 | -1.90 | -3.73 | -5.76  | 9.6E-04 |
| A_12_P108185 | C09E7.8b     |                                                 | WBGene00015642 | -1.90 | -3.72 | -8.01  | 1.5E-04 |
| A_12_P102827 | F41H10.3a    |                                                 | WBGene00018316 | -1.89 | -3.72 | -6.99  | 3.2E-04 |
| A_12_P107504 | C06A5.1      |                                                 | WBGene00015499 | -1.89 | -3.71 | -7.78  | 1.7E-04 |
| A_12_P111362 | C05C10.2b.2  | NAM7 protein [C05C10.2b.2]                      | WBGene00007329 | -1.89 | -3.71 | -5.93  | 8.1E-04 |
| A_12_P118464 | H20J04.2     |                                                 | WBGene00019217 | -1.89 | -3.70 | -5.74  | 9.7E-04 |
| A_12_P114225 | C01F1.1      | dna binding protein [C01F1.1]                   | WBGene00015296 | -1.89 | -3.70 | -5.74  | 9.7E-04 |
| A_12_P111418 | T05G5.1.1    | Caldesmon-like repeats [T05G5.1.1]              | WBGene00011498 | -1.88 | -3.69 | -6.29  | 5.8E-04 |
| A_12_P116189 | B0495.2      | CDC2 [B0495.2]                                  | WBGene00015203 | -1.88 | -3.69 | -7.65  | 1.9E-04 |
| A_12_P110478 | C34G6.1      |                                                 | WBGene00016418 | -1.88 | -3.68 | -7.85  | 1.6E-04 |
| A_12_P111915 | F25G6.2      |                                                 | WBGene00017797 | -1.88 | -3.68 | -6.36  | 5.5E-04 |
| A_12_P103891 | D2096.10     |                                                 | WBGene00017077 | -1.88 | -3.67 | -8.14  | 1.3E-04 |
| A_12_P108099 | T14G8.3.2    | heat shock protein [T14G8.3.2]                  | WBGene00011771 | -1.88 | -3.67 | -6.29  | 5.9E-04 |
| A_12_P106844 | F33H1.4      |                                                 | WBGene00009365 | -1.87 | -3.66 | -5.71  | 1.0E-03 |
| A_12_P104990 | C37A2.5b.1   |                                                 | WBGene00004111 | -1.87 | -3.66 | -7.03  | 3.1E-04 |
| A_12_P101485 | C36B1.8a     |                                                 | WBGene00007975 | -1.87 | -3.65 | -7.62  | 2.0E-04 |
| A_12_P118965 | ZK1098.10b.2 |                                                 | WBGene00006755 | -1.86 | -3.64 | -6.33  | 5.6E-04 |
| A_12_P118491 | H38K22.1     |                                                 | WBGene00001352 | -1.86 | -3.64 | -8.67  | 9.1E-05 |
| A_12_P119050 | C05D10.2a.2  |                                                 | WBGene00015478 | -1.86 | -3.63 | -6.50  | 4.9E-04 |
| A_12_P117715 | F59A3.5b     |                                                 | WBGene00019078 | -1.85 | -3.61 | -7.13  | 2.9E-04 |
| A_12_P115344 | F11E6.7      |                                                 | WBGene00008710 | -1.85 | -3.61 | -5.76  | 9.6E-04 |
| A_12_P101520 | F18C5.2.1    |                                                 | WBGene00006944 | -1.85 | -3.60 | -6.78  | 3.8E-04 |
| A_12_P105615 | C25G4.5      |                                                 | WBGene00001085 | -1.85 | -3.59 | -6.00  | 7.6E-04 |
| A_12_P113265 | T26A5.5a     |                                                 | WBGene00020821 | -1.83 | -3.56 | -7.19  | 2.7E-04 |
| A_12_P104454 | R11A8.7a     | ankyrin repeats [R11A8.7a]                      | WBGene00011240 | -1.83 | -3.56 | -8.90  | 7.8E-05 |
| A_12_P103125 | ZK154.5      |                                                 | WBGene00022667 | -1.83 | -3.56 | -6.46  | 5.1E-04 |
| A_12_P111672 | K04D7.5.2    |                                                 | WBGene00001653 | -1.83 | -3.56 | -6.12  | 6.8E-04 |
| A_12_P114161 | F14H8.6      | CNG channel protein [F14H8.6]                   | WBGene00000562 | -1.83 | -3.56 | -6.08  | 7.1E-04 |
| A_12_P103497 | C10H11.9     | Rho-associated kinase [C10H11.9]                | WBGene00002694 | -1.83 | -3.55 | -6.68  | 4.2E-04 |
| A_12_P112500 | F28B12.3.1   | Protein kinase [F28B12.3.1]                     | WBGene00017895 | -1.82 | -3.54 | -6.92  | 3.4E-04 |
| A_12_P109319 | R13H4.4      | alpha-catenin [R13H4.4]                         | WBGene00001978 | -1.82 | -3.54 | -5.81  | 9.1E-04 |
| A_12_P105303 | W04A8.7      | transcription initiation factor TFIID [W04A8.7] | WBGene00006382 | -1.82 | -3.54 | -9.66  | 4.8E-05 |
| A_12_P107035 | C52B9.8      | helicase [C52B9.8]                              | WBGene00016868 | -1.82 | -3.52 | -9.59  | 5.0E-05 |
| A_12_P112182 | Y54E10A.12   |                                                 | WBGene00021832 | -1.82 | -3.52 | -6.21  | 6.3E-04 |
| A_12_P114589 | F54D8.6b     |                                                 | WBGene00018802 | -1.81 | -3.52 | -6.74  | 4.0E-04 |
| A_12_P119085 | F53H1.4a     |                                                 | WBGene00018778 | -1.81 | -3.51 | -6.29  | 5.8E-04 |
| A_12_P109040 | C52E12.1.1   | zinc-finger containing protein [C52E12.1.1]     | WBGene00016888 | -1.81 | -3.51 | -6.58  | 4.6E-04 |
| A_12_P105085 | EEED8.5      | RNA helicase [EEED8.5]                          | WBGene00003393 | -1.81 | -3.50 | -6.71  | 4.0E-04 |
| A_12_P115666 | Y111B2A.26   |                                                 | WBGene00013743 | -1.81 | -3.50 | -8.39  | 1.1E-04 |
| A_12_P101703 | F58H1.1      | alpha-mannosidase [F58H1.1]                     | WBGene00010284 | -1.81 | -3.50 | -6.74  | 4.0E-04 |
| A_12_P110508 | H27M09.3     |                                                 | WBGene00019247 | -1.80 | -3.49 | -6.23  | 6.2E-04 |
| A_12_P103899 | T11G6.5      |                                                 | WBGene00011720 | -1.80 | -3.48 | -8.19  | 1.3E-04 |
| A_12_P100356 | F18C5.3      |                                                 | WBGene00007050 | -1.80 | -3.48 | -8.73  | 8.8E-05 |
| A_12_P113115 | B0523.5      |                                                 | WBGene00001443 | -1.79 | -3.47 | -7.29  | 2.5E-04 |
| A_12_P115271 | C04D8.1      | GTPase-activating protein [C04D8.1]             | WBGene00015418 | -1.79 | -3.46 | -6.64  | 4.3E-04 |
| A_12_P105098 | C48B6.6b     | kinase [C48B6.6a]                               | WBGene00004879 | -1.79 | -3.45 | -11.93 | 1.3E-05 |
| A_12_P105052 | K08H10.7     |                                                 | WBGene00004323 | -1.79 | -3.45 | -7.44  | 2.2E-04 |
| A_12_P101623 | Y44A6B.3     |                                                 | WBGene00012848 | -1.78 | -3.43 | -10.14 | 3.6E-05 |
| A_12_P113913 | F29D11.2.2   |                                                 | WBGene00009254 | -1.78 | -3.42 | -8.48  | 1.0E-04 |
| A_12_P107634 | F01G4.3      | antiviral protein SKI2 like [F01G4.3]           | WBGene00008502 | -1.77 | -3.41 | -7.13  | 2.9E-04 |
| A_12_P114628 | F46B6.5b     |                                                 | WBGene00009770 | -1.77 | -3.41 | -6.50  | 4.9E-04 |
| A_12_P103144 | F55F8.4      |                                                 | WBGene00018892 | -1.77 | -3.41 | -6.32  | 5.7E-04 |
| A_12_P104303 | Y53C12B.3b   |                                                 | WBGene00003785 | -1.76 | -3.38 | -6.16  | 6.6E-04 |
| A_12_P101580 | F46F11.9a    |                                                 | WBGene00018512 | -1.75 | -3.37 | -5.73  | 9.8E-04 |
| A_12_P105912 | C09G5.7      |                                                 | WBGene00007489 | -1.75 | -3.37 | -8.43  | 1.1E-04 |
| A_12_P111062 | R08D7.1.1    |                                                 | WBGene00011142 | -1.75 | -3.36 | -7.04  | 3.1E-04 |
| A_12_P101665 | F20C5.1a.1   | poly(ADP)ribose glycohydrolases [F20C5.1a.1]    | WBGene00004051 | -1.75 | -3.36 | -6.54  | 4.7E-04 |
| A_12_P106536 | T21G5.3      | RNA helicase [T21G5.3]                          | WBGene00001598 | -1.75 | -3.35 | -6.68  | 4.2E-04 |
| A_12_P118326 | C26C6.5a     |                                                 | WBGene00000938 | -1.75 | -3.35 | -8.36  | 1.1E-04 |
| A_12_P117865 | C09E7.9      |                                                 | WBGene00015643 | -1.74 | -3.35 | -10.02 | 3.8E-05 |
| A_12_P116005 | B0414.7b     | protein kinase [B0414.7a]                       | WBGene00003472 | -1.74 | -3.34 | -6.88  | 3.5E-04 |
| A_12_P110130 | Y65B4A.1     |                                                 | WBGene00022025 | -1.74 | -3.34 | -5.98  | 7.8E-04 |
| A_12_P115807 | ZK1098.3     | ribonuclease D [ZK1098.3]                       | WBGene00014220 | -1.73 | -3.33 | -8.02  | 1.4E-04 |
| A_12_P115274 | F26E4.10     |                                                 | WBGene00009163 | -1.73 | -3.32 | -7.58  | 2.0E-04 |

Bukhari et al, Supplemental Table 1

|              |              |                                                                                     |                |       |       |        |         |
|--------------|--------------|-------------------------------------------------------------------------------------|----------------|-------|-------|--------|---------|
| A_12_P104161 | ZK112.7      | fat tumor suppressor [ZK112.7]                                                      | WBGene00000395 | -1.73 | -3.31 | -7.52  | 2.1E-04 |
| A_12_P114090 | C44E4.7      |                                                                                     | WBGene00016656 | -1.73 | -3.31 | -7.02  | 3.1E-04 |
| A_12_P115272 | ZK809.5a     |                                                                                     | WBGene00014087 | -1.72 | -3.30 | -7.07  | 3.0E-04 |
| A_12_P110387 | D1037.1.2    |                                                                                     | WBGene00017025 | -1.72 | -3.30 | -8.03  | 1.4E-04 |
| A_12_P108242 | K10D2.3.2    |                                                                                     | WBGene00019629 | -1.72 | -3.29 | -7.76  | 1.8E-04 |
| A_12_P101903 | H06I04.3a.2  |                                                                                     | WBGene00019168 | -1.71 | -3.27 | -8.84  | 8.1E-05 |
| A_12_P116817 | F52B5.3      | helicase [F52B5.3]                                                                  | WBGene00009922 | -1.71 | -3.27 | -7.55  | 2.1E-04 |
| A_12_P104664 | Y42H9B.2     |                                                                                     | WBGene00004371 | -1.71 | -3.27 | -8.52  | 1.0E-04 |
| A_12_P101477 | T05A10.1a    |                                                                                     | WBGene00004862 | -1.71 | -3.26 | -7.01  | 3.2E-04 |
| A_12_P109399 | F18C12.3.1   |                                                                                     | WBGene00008934 | -1.71 | -3.26 | -6.06  | 7.2E-04 |
| A_12_P118368 | H05L14.2     | Zinc finger, C3HC4 type (RING finger) [H05L14.2]                                    | WBGene00010367 | -1.71 | -3.26 | -9.45  | 5.5E-05 |
| A_12_P101527 | Y50D7A.6     |                                                                                     | WBGene00002230 | -1.70 | -3.25 | -7.72  | 1.8E-04 |
| A_12_P104906 | W02D3.10b    |                                                                                     | WBGene00020935 | -1.70 | -3.24 | -9.18  | 6.5E-05 |
| A_12_P111170 | ZK1067.2     |                                                                                     | WBGene00014208 | -1.70 | -3.24 | -9.97  | 3.9E-05 |
| A_12_P104291 | ZK177.2      |                                                                                     | WBGene00022670 | -1.70 | -3.24 | -5.90  | 8.3E-04 |
| A_12_P117080 | F54B3.1      | ATP binding protein (CDC48/PAS1/SEC18 family) [F54B3.1]                             | WBGene00010013 | -1.69 | -3.22 | -8.99  | 7.3E-05 |
| A_12_P104693 | K01C8.5      |                                                                                     | WBGene00001571 | -1.68 | -3.20 | -6.50  | 4.9E-04 |
| A_12_P118648 | T04A8.15     | glucose-6-phosphate 1-dehydrogenase [T04A8.15]                                      | WBGene00011415 | -1.67 | -3.19 | -6.86  | 3.6E-04 |
| A_12_P114858 | C03D6.4      | nucleoporin [C03D6.4]                                                               | WBGene00003800 | -1.67 | -3.18 | -6.96  | 3.3E-04 |
| A_12_P107187 | A_12_P107187 |                                                                                     | WBGene00014903 | -1.67 | -3.17 | -7.74  | 1.8E-04 |
| A_12_P113285 | F55A12.1     |                                                                                     | WBGene00018862 | -1.65 | -3.15 | -6.71  | 4.1E-04 |
| A_12_P114050 | C10C5.6a     | Yeast YHY6 like [C10C5.6a]                                                          | WBGene00000911 | -1.65 | -3.15 | -9.48  | 5.3E-05 |
| A_12_P109817 | C01B7.6      |                                                                                     | WBGene00004457 | -1.65 | -3.14 | -7.15  | 2.8E-04 |
| A_12_P103789 | ZK1151.1c    |                                                                                     | WBGene00006876 | -1.65 | -3.13 | -8.35  | 1.1E-04 |
| A_12_P100720 | T10F2.3      |                                                                                     | WBGene00006736 | -1.64 | -3.13 | -5.84  | 8.9E-04 |
| A_12_P113934 | C34F6.9      | Ubiquitin carboxyl-terminal hydrolases family 2 [C34F6.9]                           | WBGene00007943 | -1.64 | -3.12 | -6.60  | 4.5E-04 |
| A_12_P115395 | Y92H12A.5    |                                                                                     | WBGene00022361 | -1.64 | -3.12 | -5.91  | 8.3E-04 |
| A_12_P104116 | F36F2.6      |                                                                                     | WBGene00009479 | -1.64 | -3.11 | -6.33  | 5.6E-04 |
| A_12_P110351 | C25D7.3      | Zinc finger, C2H2 type [C25D7.3]                                                    | WBGene00004747 | -1.64 | -3.11 | -7.88  | 1.6E-04 |
| A_12_P105490 | C18E9.3b     |                                                                                     | WBGene00004105 | -1.64 | -3.11 | -6.67  | 4.2E-04 |
| A_12_P113623 | R107.4c      | tyrosine-protein kinase [R107.4a]                                                   | WBGene00011299 | -1.64 | -3.11 | -7.12  | 2.9E-04 |
| A_12_P104462 | Y111B2A.4    |                                                                                     | WBGene00013731 | -1.63 | -3.10 | -9.33  | 5.9E-05 |
| A_12_P103015 | F44A6.1a.1   | nucleobindin [F44A6.1a.1]                                                           | WBGene00009674 | -1.63 | -3.10 | -5.98  | 7.8E-04 |
| A_12_P102103 | F25F2.2      | Approximately 25 cadherin-repeats, 3 EGF domains and one Laminin G domain [F25F2.2] | WBGene00000396 | -1.63 | -3.09 | -9.92  | 4.1E-05 |
| A_12_P107894 | F36F2.3.1    | Zinc finger, C3HC4 type (RING finger), Zinc finger, CCHC class [F36F2.3.1]          | WBGene00009477 | -1.62 | -3.07 | -7.70  | 1.8E-04 |
| A_12_P111726 | B0379.3a     |                                                                                     | WBGene00003508 | -1.62 | -3.07 | -6.56  | 4.6E-04 |
| A_12_P101469 | T05F1.6      | BRCA1 C Terminus (BRCT) domain [T05F1.6]                                            | WBGene00002027 | -1.62 | -3.07 | -7.28  | 2.6E-04 |
| A_12_P119439 | Y18D10A.1    |                                                                                     | WBGene00012474 | -1.62 | -3.07 | -7.80  | 1.7E-04 |
| A_12_P107606 | M01E11.3     |                                                                                     | WBGene00019712 | -1.62 | -3.07 | -6.96  | 3.3E-04 |
| A_12_P111229 | M110.4b      | eukaryotic initiation factor [M110.4a]                                              | WBGene00002066 | -1.62 | -3.06 | -6.99  | 3.2E-04 |
| A_12_P101497 | F26A3.8      |                                                                                     | WBGene00004508 | -1.61 | -3.06 | -6.73  | 4.0E-04 |
| A_12_P114594 | T27B1.1      | leucine zipper transcription factor(weak) [T27B1.1]                                 | WBGene00003883 | -1.61 | -3.06 | -10.67 | 2.6E-05 |
| A_12_P114534 | R06B10.2     |                                                                                     | WBGene00019913 | -1.61 | -3.05 | -9.40  | 5.6E-05 |
| A_12_P114305 | M106.1       | mitotic chromosome and X-chromosome associated MIX-1 protein [M106.1]               | WBGene00003367 | -1.61 | -3.04 | -9.13  | 6.7E-05 |
| A_12_P115946 | T13H2.5      |                                                                                     | WBGene00020496 | -1.60 | -3.03 | -8.40  | 1.1E-04 |
| A_12_P107928 | F23B12.8.1   | kinesin-like protein [F23B12.8.1]                                                   | WBGene00000257 | -1.59 | -3.02 | -5.74  | 9.8E-04 |
| A_12_P105344 | Y47G6A.23    |                                                                                     | WBGene00003060 | -1.59 | -3.00 | -8.19  | 1.3E-04 |
| A_12_P101918 | T01E8.5      |                                                                                     | WBGene00011333 | -1.58 | -3.00 | -6.03  | 7.4E-04 |
| A_12_P107391 | ZC308.1a     |                                                                                     | WBGene00001596 | -1.58 | -3.00 | -8.30  | 1.2E-04 |
| A_12_P107637 | F45F2.10.1   |                                                                                     | WBGene00018482 | -1.58 | -2.99 | -7.61  | 2.0E-04 |
| A_12_P115406 | K02A2.3      | Bumetanide-sensitive Na-K-C1 cotransporter [K02A2.3]                                | WBGene00019289 | -1.58 | -2.99 | -8.14  | 1.3E-04 |
| A_12_P115960 | M03C11.3     |                                                                                     | WBGene00010840 | -1.58 | -2.98 | -5.84  | 8.8E-04 |
| A_12_P112054 | T23B3.3      |                                                                                     | WBGene00020711 | -1.57 | -2.97 | -6.45  | 5.1E-04 |
| A_12_P117849 | C37A2.2      |                                                                                     | WBGene00004110 | -1.56 | -2.96 | -7.03  | 3.1E-04 |
| A_12_P107043 | Y54F10BM.2   |                                                                                     | WBGene00021857 | -1.56 | -2.94 | -6.09  | 7.0E-04 |
| A_12_P111917 | T04G9.1      |                                                                                     | WBGene00020214 | -1.56 | -2.94 | -7.92  | 1.6E-04 |
| A_12_P114034 | C07H6.3.1    |                                                                                     | WBGene00015580 | -1.56 | -2.94 | -6.75  | 3.9E-04 |
| A_12_P108480 | K09C4.10     |                                                                                     | WBGene00019554 | -1.55 | -2.94 | -6.45  | 5.1E-04 |
| A_12_P110925 | C48B4.4b.2   | ABC transporters [C48B4.4b.2]                                                       | WBGene00000421 | -1.55 | -2.93 | -6.22  | 6.3E-04 |
| A_12_P102446 | F59A2.6      |                                                                                     | WBGene00010306 | -1.55 | -2.92 | -7.67  | 1.9E-04 |
| A_12_P110157 | M02E1.1b.1   |                                                                                     | WBGene00019733 | -1.55 | -2.92 | -6.23  | 6.2E-04 |
| A_12_P118475 | F41E6.4a     |                                                                                     | WBGene00018285 | -1.55 | -2.92 | -6.98  | 3.2E-04 |
| A_12_P119231 | Y17G7B.9     | Peptidyl-prolyl cis-trans isomerases [Y17G7B.9]                                     | WBGene00000892 | -1.54 | -2.90 | -6.28  | 5.9E-04 |
| A_12_P111405 | F40H3.6      |                                                                                     | WBGene00018252 | -1.54 | -2.90 | -9.84  | 4.3E-05 |
| A_12_P109912 | M01G12.12    |                                                                                     | WBGene00004509 | -1.54 | -2.90 | -7.67  | 1.9E-04 |

Bukhari et al, Supplemental Table 1

|              |              |                                                                 |                |       |       |       |         |
|--------------|--------------|-----------------------------------------------------------------|----------------|-------|-------|-------|---------|
| A_12_P113351 | M88.5a       | hnRNP K [M88.5a]                                                | WBGene00010908 | -1.53 | -2.88 | -6.10 | 6.9E-04 |
| A_12_P107198 | C28C12.1     |                                                                 | WBGene00016177 | -1.53 | -2.88 | -6.88 | 3.5E-04 |
| A_12_P102835 | R06A4.8      | Alpha amylase [R06A4.8]                                         | WBGene00011050 | -1.52 | -2.88 | -6.10 | 6.9E-04 |
| A_12_P118000 | B0391.10     |                                                                 | WBGene00007165 | -1.52 | -2.87 | -5.81 | 9.1E-04 |
| A_12_P110518 | F56E10.1     |                                                                 | WBGene00018975 | -1.51 | -2.85 | -8.32 | 1.2E-04 |
| A_12_P115572 | T22C1.10b    |                                                                 | WBGene00004318 | -1.51 | -2.85 | -6.19 | 6.4E-04 |
| A_12_P110299 | Y73B3A.9     |                                                                 | WBGene00022211 | -1.51 | -2.84 | -8.55 | 9.9E-05 |
| A_12_P110708 | ZK858.1      | S.pombe hypothetical protein C12G12.13C like [ZK858.1]          | WBGene00014115 | -1.51 | -2.84 | -6.24 | 6.1E-04 |
| A_12_P111142 | F26F4.7      |                                                                 | WBGene00003598 | -1.50 | -2.82 | -7.54 | 2.1E-04 |
| A_12_P120371 | F57C9.4a     |                                                                 | WBGene00019011 | -1.50 | -2.82 | -6.33 | 5.6E-04 |
| A_12_P116131 | T02G5.1      |                                                                 | WBGene00020161 | -1.49 | -2.80 | -6.43 | 5.2E-04 |
| A_12_P100063 | C35C5.1.1    |                                                                 | WBGene00004746 | -1.48 | -2.79 | -6.19 | 6.4E-04 |
| A_12_P112800 | F36A2.13     |                                                                 | WBGene00009460 | -1.48 | -2.79 | -7.12 | 2.9E-04 |
| A_12_P116105 | T22B7.4      |                                                                 | WBGene00020673 | -1.48 | -2.79 | -6.78 | 3.8E-04 |
| A_12_P119372 | C56G2.1b     |                                                                 | WBGene00016977 | -1.48 | -2.78 | -7.76 | 1.8E-04 |
| A_12_P118851 | F15B10.2.1   |                                                                 | WBGene00001090 | -1.47 | -2.78 | -6.71 | 4.1E-04 |
| A_12_P105636 | E02D9.1c     | protein kinase [E02D9.1a]                                       | WBGene00017098 | -1.47 | -2.78 | -7.54 | 2.1E-04 |
| A_12_P104174 | ZK632.7      |                                                                 | WBGene00014015 | -1.47 | -2.77 | -6.05 | 7.3E-04 |
| A_12_P102969 | F53H1.1a     | helicase [F53H1.1a]                                             | WBGene00018776 | -1.47 | -2.77 | -5.89 | 8.5E-04 |
| A_12_P117550 | F47F2.1b.1   |                                                                 | WBGene00018569 | -1.47 | -2.77 | -5.74 | 9.7E-04 |
| A_12_P117296 | C03B1.7      |                                                                 | WBGene00015378 | -1.47 | -2.76 | -8.88 | 7.9E-05 |
| A_12_P107123 | Y76A2B.2     | Leucine Rich Repeat (2 copies) (2 domains) [Y76A2B.2]           | WBGene00013574 | -1.46 | -2.76 | -5.78 | 9.3E-04 |
| A_12_P115260 | T07D4.3      | ATP-dependent RNA helicase [T07D4.3]                            | WBGene00004355 | -1.46 | -2.75 | -5.88 | 8.6E-04 |
| A_12_P112449 | M02D8.3      |                                                                 | WBGene00019729 | -1.46 | -2.74 | -6.28 | 5.9E-04 |
| A_12_P107509 | Y47D3A.26    |                                                                 | WBGene00004873 | -1.45 | -2.74 | -7.22 | 2.7E-04 |
| A_12_P103745 | T01A4.1b     | guanylyl cyclase [T01A4.1b]                                     | WBGene00020131 | -1.45 | -2.74 | -6.33 | 5.7E-04 |
| A_12_P107709 | C42D4.8      | DNA-directed RNA polymerase II largest subunit [C42D4.8]        | WBGene00004411 | -1.45 | -2.74 | -5.74 | 9.7E-04 |
| A_12_P109546 | F43G9.12     | Human GC-rich sequence DNA-binding factor (GCF) like [F43G9.12] | WBGene00009672 | -1.45 | -2.74 | -6.99 | 3.2E-04 |
| A_12_P102203 | F15C11.2c    | Ubiquitin family [F15C11.2c]                                    | WBGene00008852 | -1.45 | -2.73 | -5.87 | 8.6E-04 |
| A_12_P118453 | A_12_P118453 |                                                                 | WBGene00021485 | -1.45 | -2.73 | -7.42 | 2.3E-04 |
| A_12_P104632 | F40F12.5     | Ubiquitin carboxyl-terminal hydrolases family 2 [F40F12.5]      | WBGene00009594 | -1.45 | -2.72 | -5.87 | 8.6E-04 |
| A_12_P114782 | C01G6.5      | Forkhead-associated (FHA) domain [C01G6.5]                      | WBGene00007227 | -1.44 | -2.72 | -6.38 | 5.4E-04 |
| A_12_P118616 | C55B7.1      | RNA helicase [C55B7.1]                                          | WBGene00001599 | -1.44 | -2.72 | -5.86 | 8.7E-04 |
| A_12_P114646 | T24B8.7b     |                                                                 | WBGene00011980 | -1.44 | -2.72 | -7.24 | 2.6E-04 |
| A_12_P108836 | ZK1251.9.2   |                                                                 | WBGene00014243 | -1.44 | -2.71 | -8.20 | 1.3E-04 |
| A_12_P108725 | C34E10.8     |                                                                 | WBGene00016409 | -1.44 | -2.71 | -7.01 | 3.2E-04 |
| A_12_P103798 | C01H6.5b.2   | nuclear hormone receptor [C01H6.5b.2]                           | WBGene00003622 | -1.44 | -2.70 | -6.40 | 5.3E-04 |
| A_12_P116441 | T20G5.1      | Clathrin heavy chain [T20G5.1]                                  | WBGene00011867 | -1.43 | -2.69 | -5.75 | 9.7E-04 |
| A_12_P113060 | K03B8.11     |                                                                 | WBGene00010526 | -1.43 | -2.69 | -6.83 | 3.7E-04 |
| A_12_P113695 | Y67H2A.10    |                                                                 | WBGene00013465 | -1.42 | -2.68 | -7.31 | 2.5E-04 |
| A_12_P107021 | Y55D5A.5.1   |                                                                 | WBGene00000898 | -1.42 | -2.68 | -5.80 | 9.2E-04 |
| A_12_P119686 | C49H3.5b     | zinc-finger transcription regulator [C49H3.5a]                  | WBGene00003827 | -1.42 | -2.67 | -6.76 | 3.9E-04 |
| A_12_P115611 | CE7X_3.2     |                                                                 | WBGene00008350 | -1.41 | -2.66 | -6.00 | 7.6E-04 |
| A_12_P117777 | C34D4.14     |                                                                 | WBGene00016405 | -1.41 | -2.66 | -7.59 | 2.0E-04 |
| A_12_P115300 | T08A9.4.1    |                                                                 | WBGene00020336 | -1.40 | -2.65 | -7.33 | 2.4E-04 |
| A_12_P107879 | M70.5        |                                                                 | WBGene00022206 | -1.39 | -2.63 | -6.05 | 7.3E-04 |
| A_12_P117514 | Y49A3A.4     |                                                                 | WBGene00013027 | -1.39 | -2.62 | -6.86 | 3.6E-04 |
| A_12_P114669 | K11C4.5      | ryanodine receptor [K11C4.5]                                    | WBGene00006801 | -1.39 | -2.62 | -7.02 | 3.1E-04 |
| A_12_P118979 | F39H11.2     | transcription factor TFIIID like [F39H11.2]                     | WBGene00006577 | -1.39 | -2.61 | -5.81 | 9.1E-04 |
| A_12_P116986 | ZK1248.7     |                                                                 | WBGene00022877 | -1.38 | -2.61 | -6.08 | 7.1E-04 |
| A_12_P116662 | Y110A7A.1a   |                                                                 | WBGene00001833 | -1.38 | -2.60 | -5.73 | 9.8E-04 |
| A_12_P108533 | C28H8.3.1    |                                                                 | WBGene00016194 | -1.38 | -2.60 | -6.63 | 4.4E-04 |
| A_12_P117762 | C41A3.2b     |                                                                 | WBGene00016559 | -1.38 | -2.60 | -6.07 | 7.1E-04 |
| A_12_P108184 | T08D2.5      |                                                                 | WBGene00011610 | -1.37 | -2.59 | -5.77 | 9.5E-04 |
| A_12_P106136 | C08B11.3     | Zinc finger, C2H2 type [C08B11.3]                               | WBGene00007433 | -1.36 | -2.57 | -6.90 | 3.5E-04 |
| A_12_P108416 | W03F11.6d    |                                                                 | WBGene00021009 | -1.36 | -2.56 | -7.12 | 2.9E-04 |
| A_12_P110287 | F28F8.7      |                                                                 | WBGene00009224 | -1.35 | -2.55 | -6.87 | 3.6E-04 |
| A_12_P112421 | T27E9.1a.1   | ADP/ATP carrier protein [T27E9.1a.1]                            | WBGene00006439 | -1.35 | -2.55 | -5.77 | 9.4E-04 |
| A_12_P115512 | F28C1.3a.1   | Leucine Rich Repeat (2 copies) (3 domains) [F28C1.3a.1]         | WBGene00009201 | -1.35 | -2.54 | -6.49 | 4.9E-04 |
| A_12_P114587 | R09E10.7     |                                                                 | WBGene00004140 | -1.35 | -2.54 | -6.56 | 4.6E-04 |
| A_12_P103720 | F55F10.1     |                                                                 | WBGene00018898 | -1.34 | -2.53 | -7.91 | 1.6E-04 |
| A_12_P116807 | F10G7.10b    |                                                                 | WBGene00017373 | -1.34 | -2.52 | -6.88 | 3.5E-04 |
| A_12_P100767 | C16H3.3b     |                                                                 | WBGene00015868 | -1.34 | -2.52 | -6.57 | 4.6E-04 |
| A_12_P107775 | C36E8.3.2    |                                                                 | WBGene00007982 | -1.33 | -2.52 | -7.22 | 2.7E-04 |
| A_12_P102759 | F56F3.1      |                                                                 | WBGene00004132 | -1.32 | -2.50 | -5.97 | 7.8E-04 |

Bukhari et al, Supplemental Table 1

|              |             |                                                                  |                |       |       |       |         |
|--------------|-------------|------------------------------------------------------------------|----------------|-------|-------|-------|---------|
| A_12_P110653 | ZK836.2.2   | 2-oxoglutarate dehydrogenase [ZK836.2.2]                         | WBGene00014098 | -1.32 | -2.49 | -5.95 | 8.0E-04 |
| A_12_P102669 | Y73B3A.13   |                                                                  | WBGene00022215 | -1.31 | -2.49 | -5.85 | 8.8E-04 |
| A_12_P113381 | Y39A1C.1    |                                                                  | WBGene00012662 | -1.31 | -2.47 | -5.97 | 7.8E-04 |
| A_12_P106921 | Y6B3A.1a    | Sec7 domain [Y6B3A.1a]                                           | WBGene00012386 | -1.29 | -2.45 | -5.99 | 7.7E-04 |
| A_12_P100792 | M151.4      |                                                                  | WBGene00019796 | -1.29 | -2.44 | -7.26 | 2.6E-04 |
| A_12_P104350 | H19N07.3.1  |                                                                  | WBGene00010407 | -1.28 | -2.44 | -7.04 | 3.1E-04 |
| A_12_P114699 | C06C3.7     |                                                                  | WBGene00007377 | -1.28 | -2.43 | -6.55 | 4.7E-04 |
| A_12_P104468 | B0464.5c.2  | Eukaryotic protein kinase domain [B0464.5c.2]                    | WBGene00004980 | -1.28 | -2.42 | -6.14 | 6.7E-04 |
| A_12_P115707 | K08F4.2     | RNA recognition motif. (aka RRM, RBD, or RNP domain) [K08F4.2]   | WBGene00010677 | -1.26 | -2.39 | -5.85 | 8.8E-04 |
| A_12_P111569 | F39C12.1    |                                                                  | WBGene00018193 | -1.26 | -2.39 | -6.82 | 3.7E-04 |
| A_12_P106342 | C09E7.6     |                                                                  | WBGene00015640 | -1.25 | -2.38 | -7.32 | 2.5E-04 |
| A_12_P119762 | F42D1.3     | G-protein coupled receptor [F42D1.3]                             | WBGene00009629 | -1.23 | -2.35 | -6.25 | 6.1E-04 |
| A_12_P118321 | F55D12.5    | Activin types I and II receptor domain [F55D12.5]                | WBGene00010113 | -1.23 | -2.35 | -6.39 | 5.4E-04 |
| A_12_P114616 | F32A11.4    | DNA topoisomerase II (N-terminal region) [F32A11.4]              | WBGene00009309 | -1.23 | -2.35 | -5.93 | 8.1E-04 |
| A_12_P105285 | Y75B8A.7    |                                                                  | WBGene00013544 | -1.23 | -2.34 | -6.01 | 7.6E-04 |
| A_12_P106631 | F32E10.4.1  | importin alpha, nuclear transport factor [F32E10.4.1]            | WBGene00002074 | -1.22 | -2.33 | -5.75 | 9.6E-04 |
| A_12_P106459 | T01A4.2     |                                                                  | WBGene00020132 | -1.22 | -2.33 | -5.83 | 8.9E-04 |
| A_12_P117122 | Y106G6D.7   | RNA recognition motif. (aka RRM, RBD, or RNP domain) [Y106G6D.7] | WBGene00013703 | -1.22 | -2.32 | -5.81 | 9.1E-04 |
| A_12_P112373 | ZK742.1a.1  | importin beta, nuclear transport factor [ZK742.1a.1]             | WBGene00002078 | -1.22 | -2.32 | -5.82 | 9.0E-04 |
| A_12_P118714 | W10D5.3a    |                                                                  | WBGene00001574 | -1.21 | -2.32 | -6.39 | 5.4E-04 |
| A_12_P118911 | Y73B6BL.5b  |                                                                  | WBGene00004783 | -1.21 | -2.31 | -5.76 | 9.5E-04 |
| A_12_P102977 | Y110A7A.18  |                                                                  | WBGene00004094 | -1.21 | -2.31 | -5.87 | 8.6E-04 |
| A_12_P115606 | C18H2.2     |                                                                  | WBGene00015989 | -1.20 | -2.30 | -5.95 | 7.9E-04 |
| A_12_P116619 | Y38F2AR.6   |                                                                  | WBGene00021424 | -1.20 | -2.29 | -5.89 | 8.4E-04 |
| A_12_P100743 | F20H11.6    |                                                                  | WBGene00017649 | -1.19 | -2.29 | -7.00 | 3.2E-04 |
| A_12_P107401 | Y57A10A.1   |                                                                  | WBGene00013246 | -1.19 | -2.28 | -6.01 | 7.5E-04 |
| A_12_P108205 | Y46G5A.4    |                                                                  | WBGene00012896 | -1.19 | -2.28 | -6.41 | 5.3E-04 |
| A_12_P110035 | M01A12.1    | collagen [M01A12.1]                                              | WBGene00000630 | -1.17 | -2.25 | -7.53 | 2.1E-04 |
| A_12_P101212 | Y43H1AL.3   |                                                                  | WBGene00004166 | -1.17 | -2.24 | -7.16 | 2.8E-04 |
| A_12_P103377 | F59E12.6b   |                                                                  | WBGene00019122 | -1.17 | -2.24 | -6.30 | 5.8E-04 |
| A_12_P117158 | K08E5.2a    | Yeast ORF YCR37C [K08E5.2a]                                      | WBGene00003519 | -1.16 | -2.23 | -6.56 | 4.6E-04 |
| A_12_P116625 | F07A11.1    |                                                                  | WBGene00008545 | -1.14 | -2.21 | -5.78 | 9.4E-04 |
| A_12_P119257 | M01E5.5b    | DNA topoisomerase I [M01E5.5b]                                   | WBGene00006595 | -1.14 | -2.21 | -6.58 | 4.5E-04 |
| A_12_P116660 | C47E8.8     | SET domain [C47E8.8]                                             | WBGene00008145 | -1.14 | -2.20 | -7.17 | 2.8E-04 |
| A_12_P111661 | F47A4.2     |                                                                  | WBGene00001081 | -1.14 | -2.20 | -6.23 | 6.2E-04 |
| A_12_P114060 | C56E6.1     |                                                                  | WBGene00006522 | -1.14 | -2.20 | -6.09 | 7.0E-04 |
| A_12_P110245 | T10B10.4    |                                                                  | WBGene00011681 | -1.13 | -2.19 | -7.21 | 2.7E-04 |
| A_12_P109476 | B0511.14a   |                                                                  | WBGene00015239 | -1.13 | -2.19 | -5.73 | 9.8E-04 |
| A_12_P109081 | T04D1.4     | helicase [T04D1.4]                                               | WBGene00007053 | -1.13 | -2.19 | -5.98 | 7.8E-04 |
| A_12_P118444 | F20H11.2    |                                                                  | WBGene00003819 | -1.13 | -2.18 | -6.98 | 3.2E-04 |
| A_12_P113679 | F25C8.3a    |                                                                  | WBGene00006812 | -1.12 | -2.17 | -5.87 | 8.6E-04 |
| A_12_P113558 | C44H4.4     |                                                                  | WBGene00006366 | -1.12 | -2.17 | -7.50 | 2.1E-04 |
| A_12_P119281 | W07B3.2d.2  |                                                                  | WBGene00001561 | -1.12 | -2.17 | -5.78 | 9.4E-04 |
| A_12_P107496 | F40F11.2    |                                                                  | WBGene00009587 | -1.12 | -2.17 | -7.58 | 2.0E-04 |
| A_12_P105221 | F20B6.9     |                                                                  | WBGene00017632 | -1.11 | -2.15 | -6.65 | 4.3E-04 |
| A_12_P108702 | M03A8.2     |                                                                  | WBGene00019748 | -1.10 | -2.15 | -5.95 | 8.0E-04 |
| A_12_P119712 | C06C3.1d    |                                                                  | WBGene00003196 | -1.09 | -2.13 | -5.86 | 8.7E-04 |
| A_12_P103881 | Y48G9A.2    |                                                                  | WBGene00021697 | -1.09 | -2.13 | -6.87 | 3.5E-04 |
| A_12_P105122 | F28H6.6     |                                                                  | WBGene00009234 | -1.09 | -2.12 | -6.36 | 5.5E-04 |
| A_12_P114755 | Y41E3.11    |                                                                  | WBGene00012769 | -1.07 | -2.10 | -7.11 | 2.9E-04 |
| A_12_P117018 | Y73B6BL.28  |                                                                  | WBGene00022249 | -1.07 | -2.10 | -6.82 | 3.7E-04 |
| A_12_P112928 | Y47G6A.29   |                                                                  | WBGene00021652 | -1.06 | -2.09 | -6.53 | 4.7E-04 |
| A_12_P107489 | T27E4.1     |                                                                  | WBGene00020861 | -1.06 | -2.08 | -5.73 | 9.8E-04 |
| A_12_P111888 | Y54F10AM.4a |                                                                  | WBGene00000464 | -1.05 | -2.08 | -6.77 | 3.9E-04 |
| A_12_P102293 | C15C7.2     |                                                                  | WBGene00002220 | -1.05 | -2.07 | -5.80 | 9.2E-04 |
| A_12_P109905 | W09D10.2    | ATPase [W09D10.2]                                                | WBGene00012360 | -1.05 | -2.07 | -6.47 | 5.0E-04 |
| A_12_P114842 | F53E10.5    |                                                                  | WBGene00018761 | -1.05 | -2.07 | -7.30 | 2.5E-04 |
| A_12_P111169 | F40E12.2    |                                                                  | WBGene00018235 | -1.05 | -2.07 | -5.89 | 8.5E-04 |
| A_12_P114467 | W02B8.1     |                                                                  | WBGene00012197 | -1.05 | -2.06 | -5.85 | 8.8E-04 |
| A_12_P108379 | C10C5.1     |                                                                  | WBGene00007505 | -1.04 | -2.05 | -5.94 | 8.1E-04 |
| A_12_P106218 | Y73B6A.5b   |                                                                  | WBGene00003030 | -1.04 | -2.05 | -5.85 | 8.8E-04 |
| A_12_P104389 | K07G5.3     | C2 domain [K07G5.3]                                              | WBGene00010642 | -1.04 | -2.05 | -6.71 | 4.1E-04 |
| A_12_P118859 | F56A6.2     | myosin [F56A6.2]                                                 | WBGene00002040 | -1.03 | -2.05 | -5.78 | 9.4E-04 |
| A_12_P115216 | F52C12.4    |                                                                  | WBGene00018681 | -1.03 | -2.04 | -5.77 | 9.5E-04 |
| A_12_P102762 | Y34D9A.7    |                                                                  | WBGene00021332 | -1.02 | -2.03 | -5.74 | 9.8E-04 |

Bukhari et al, Supplemental Table 1

|              |             |                                                  |                |       |       |       |         |
|--------------|-------------|--------------------------------------------------|----------------|-------|-------|-------|---------|
| A_12_P103165 | F45E4.6     |                                                  | WBGene00018471 | -1.01 | -2.01 | -5.98 | 7.8E-04 |
| A_12_P106987 | K03D10.3    |                                                  | WBGene00010537 | -1.00 | -2.00 | -6.12 | 6.8E-04 |
| A_12_P104248 | C28H8.1     |                                                  | WBGene00016192 | 1.00  | 2.00  | 6.04  | 7.4E-04 |
| A_12_P112975 | F36D1.1     |                                                  | WBGene00009461 | 1.00  | 2.00  | 6.09  | 7.0E-04 |
| A_12_P109426 | Y37D8A.8    |                                                  | WBGene00012549 | 1.01  | 2.02  | 6.00  | 7.6E-04 |
| A_12_P117900 | Y38E10A.26  |                                                  | WBGene00012604 | 1.02  | 2.02  | 6.15  | 6.6E-04 |
| A_12_P105380 | C18A11.7b.4 |                                                  | WBGene00001000 | 1.02  | 2.03  | 5.91  | 8.3E-04 |
| A_12_P110482 | H19M22.2b.2 |                                                  | WBGene00002915 | 1.02  | 2.03  | 6.50  | 4.9E-04 |
| A_12_P119327 | K10D11.1    |                                                  | WBGene00010745 | 1.02  | 2.03  | 6.74  | 4.0E-04 |
| A_12_P113067 | M117.1      | sodium/phosphate transporter [M117.1]            | WBGene00010918 | 1.02  | 2.03  | 6.50  | 4.9E-04 |
| A_12_P113700 | C27C12.4    |                                                  | WBGene00007774 | 1.02  | 2.03  | 6.09  | 7.0E-04 |
| A_12_P107716 | F52F10.4    |                                                  | WBGene00018708 | 1.03  | 2.04  | 6.76  | 3.9E-04 |
| A_12_P105119 | ZK858.8     |                                                  | WBGene00014121 | 1.03  | 2.04  | 5.91  | 8.3E-04 |
| A_12_P102595 | F53A9.6     |                                                  | WBGene00018729 | 1.04  | 2.05  | 5.85  | 8.8E-04 |
| A_12_P108806 | T04C12.1    |                                                  | WBGene00011427 | 1.04  | 2.06  | 5.74  | 9.7E-04 |
| A_12_P109440 | C35C5.4     | RAS-related protein [C35C5.4]                    | WBGene00003239 | 1.04  | 2.06  | 6.02  | 7.5E-04 |
| A_12_P108847 | Y38A8.1     |                                                  | WBGene00003580 | 1.04  | 2.06  | 6.06  | 7.2E-04 |
| A_12_P100715 | C11G10.1    |                                                  | WBGene00007525 | 1.05  | 2.06  | 6.40  | 5.3E-04 |
| A_12_P100914 | ZK809.8.2   |                                                  | WBGene00014088 | 1.05  | 2.07  | 6.47  | 5.0E-04 |
| A_12_P103804 | C34D4.2     |                                                  | WBGene00016398 | 1.06  | 2.08  | 6.54  | 4.7E-04 |
| A_12_P118261 | Y44A6D.2    |                                                  | WBGene00012853 | 1.06  | 2.08  | 6.19  | 6.4E-04 |
| A_12_P115886 | M176.4      |                                                  | WBGene00010943 | 1.06  | 2.08  | 5.83  | 8.9E-04 |
| A_12_P118718 | B0334.2     | potassium channel protein [B0334.2]              | WBGene00006660 | 1.06  | 2.09  | 6.17  | 6.5E-04 |
| A_12_P118498 | C26B9.3     |                                                  | WBGene00016133 | 1.06  | 2.09  | 6.12  | 6.8E-04 |
| A_12_P115888 | C14F5.4     |                                                  | WBGene00015777 | 1.06  | 2.09  | 6.55  | 4.7E-04 |
| A_12_P104060 | F42G4.5     |                                                  | WBGene00009642 | 1.06  | 2.09  | 6.55  | 4.7E-04 |
| A_12_P103955 | C52B9.7a    |                                                  | WBGene00000510 | 1.07  | 2.10  | 6.99  | 3.2E-04 |
| A_12_P115580 | C45G9.12    |                                                  | WBGene00016683 | 1.07  | 2.10  | 6.00  | 7.6E-04 |
| A_12_P112390 | F42A9.7     |                                                  | WBGene00018336 | 1.07  | 2.10  | 6.37  | 5.5E-04 |
| A_12_P116881 | H08M01.1    | Zinc finger, C3HC4 type (RING finger) [H08M01.1] | WBGene00010373 | 1.07  | 2.10  | 6.74  | 4.0E-04 |
| A_12_P103012 | F59A7.2     |                                                  | WBGene00019090 | 1.07  | 2.10  | 6.28  | 5.9E-04 |
| A_12_P115247 | ZK1055.7.2  |                                                  | WBGene00022848 | 1.07  | 2.10  | 6.25  | 6.1E-04 |
| A_12_P105109 | K11G12.5.2  | mitochondrial 2-oxoglutarate [K11G12.5.2]        | WBGene00019656 | 1.07  | 2.11  | 6.45  | 5.1E-04 |
| A_12_P113448 | T11B7.4c    | LIM domains [T11B7.4d]                           | WBGene00001132 | 1.08  | 2.11  | 6.01  | 7.5E-04 |
| A_12_P108953 | Y37D8A.3    |                                                  | WBGene00012545 | 1.08  | 2.11  | 6.75  | 3.9E-04 |
| A_12_P108566 | C25F6.3.1   |                                                  | WBGene00016103 | 1.08  | 2.11  | 6.30  | 5.8E-04 |
| A_12_P117352 | W07G1.3     |                                                  | WBGene00012330 | 1.08  | 2.12  | 6.02  | 7.5E-04 |
| A_12_P113177 | F11C1.3     | membrane glycoprotein [F11C1.3]                  | WBGene00008692 | 1.09  | 2.13  | 6.31  | 5.7E-04 |
| A_12_P110535 | T23B3.2     |                                                  | WBGene00020710 | 1.09  | 2.13  | 6.78  | 3.8E-04 |
| A_12_P118429 | ZK930.6     |                                                  | WBGene00014156 | 1.09  | 2.13  | 6.38  | 5.4E-04 |
| A_12_P106070 | F59C6.3     |                                                  | WBGene00044792 | 1.09  | 2.13  | 6.04  | 7.3E-04 |
| A_12_P112681 | ZC190.10    |                                                  | WBGene00022544 | 1.10  | 2.14  | 7.08  | 3.0E-04 |
| A_12_P106382 | C07A9.11    | Na/Ca, K antiporter [C07A9.11]                   | WBGene00003572 | 1.10  | 2.15  | 5.98  | 7.8E-04 |
| A_12_P113937 | M02B1.4     |                                                  | WBGene00010829 | 1.10  | 2.15  | 6.78  | 3.8E-04 |
| A_12_P116940 | T20F7.3     |                                                  | WBGene00020631 | 1.11  | 2.15  | 7.04  | 3.1E-04 |
| A_12_P110319 | W01B11.1    |                                                  | WBGene00020913 | 1.11  | 2.16  | 6.81  | 3.7E-04 |
| A_12_P115821 | C07G1.6     |                                                  | WBGene00015572 | 1.11  | 2.16  | 7.01  | 3.2E-04 |
| A_12_P102126 | H06O01.4    | protein-tyrosine phosphatase [H06O01.4]          | WBGene00010371 | 1.12  | 2.17  | 7.02  | 3.2E-04 |
| A_12_P117612 | F53A9.1     |                                                  | WBGene00018724 | 1.12  | 2.17  | 6.07  | 7.1E-04 |
| A_12_P107587 | T03D8.3     | neuroendocrine protein 7B2 [T03D8.3]             | WBGene00011392 | 1.12  | 2.18  | 6.32  | 5.7E-04 |
| A_12_P100559 | C34B2.4     |                                                  | WBGene00016389 | 1.13  | 2.18  | 6.59  | 4.5E-04 |
| A_12_P110162 | H10E21.4    | calcium-binding protein [H10E21.4]               | WBGene00019184 | 1.13  | 2.18  | 5.93  | 8.2E-04 |
| A_12_P100824 | F09C6.9.1   | nuclear hormone receptor [F09C6.9.1]             | WBGene00003706 | 1.13  | 2.18  | 6.37  | 5.5E-04 |
| A_12_P119203 | F08B12.4.1  |                                                  | WBGene00008572 | 1.13  | 2.19  | 7.37  | 2.4E-04 |
| A_12_P108756 | Y60A3A.7    |                                                  | WBGene00013358 | 1.13  | 2.19  | 5.79  | 9.3E-04 |
| A_12_P110225 | C16C8.11    |                                                  | WBGene00015849 | 1.14  | 2.20  | 6.10  | 6.9E-04 |
| A_12_P104058 | F46G10.6.2  | Helix-loop-helix DNA-binding domain [F46G10.6.2] | WBGene00003511 | 1.14  | 2.21  | 6.25  | 6.1E-04 |
| A_12_P112788 | F28E10.4    |                                                  | WBGene00017902 | 1.14  | 2.21  | 6.16  | 6.6E-04 |
| A_12_P104898 | F47D12.6    |                                                  | WBGene00018562 | 1.14  | 2.21  | 7.02  | 3.1E-04 |
| A_12_P117444 | F09B9.3     | ER lumen protein retaining receptor [F09B9.3]    | WBGene00001331 | 1.15  | 2.22  | 5.95  | 8.0E-04 |
| A_12_P103489 | F33D4.6a.1  |                                                  | WBGene00017998 | 1.15  | 2.23  | 6.12  | 6.8E-04 |
| A_12_P109593 | Y41D4B.10   |                                                  | WBGene00001105 | 1.16  | 2.23  | 6.30  | 5.8E-04 |
| A_12_P116483 | BE10.2      |                                                  | WBGene00007210 | 1.16  | 2.24  | 6.90  | 3.5E-04 |
| A_12_P108921 | F14H3.12    |                                                  | WBGene00008831 | 1.16  | 2.24  | 7.79  | 1.7E-04 |
| A_12_P114476 | Y47G6A.22.2 |                                                  | WBGene00021647 | 1.16  | 2.24  | 6.14  | 6.7E-04 |



Bukhari et al, Supplemental Table 1

|              |              |                                                          |                |      |      |      |         |
|--------------|--------------|----------------------------------------------------------|----------------|------|------|------|---------|
| A_12_P103009 | T08A9.2      |                                                          | WBGene00020335 | 1.17 | 2.24 | 5.73 | 9.8E-04 |
| A_12_P100683 | B0238.12     |                                                          | WBGene00015076 | 1.17 | 2.25 | 6.20 | 6.3E-04 |
| A_12_P108051 | C24A1.1      |                                                          | WBGene00016028 | 1.17 | 2.25 | 8.17 | 1.3E-04 |
| A_12_P105897 | C32F10.4.2   |                                                          | WBGene00016332 | 1.17 | 2.25 | 7.30 | 2.5E-04 |
| A_12_P101222 | C54E4.5      |                                                          | WBGene00016920 | 1.17 | 2.25 | 6.36 | 5.5E-04 |
| A_12_P110511 | F23B12.1     | serine/threonine protein phosphatase [F23B12.1]          | WBGene00009079 | 1.18 | 2.26 | 7.45 | 2.2E-04 |
| A_12_P112751 | M79.4        |                                                          | WBGene00001462 | 1.18 | 2.26 | 6.26 | 6.0E-04 |
| A_12_P103466 | Y38F2AR.10   |                                                          | WBGene00021428 | 1.18 | 2.26 | 6.54 | 4.7E-04 |
| A_12_P105129 | C16D2.1      |                                                          | WBGene00007633 | 1.18 | 2.26 | 7.73 | 1.8E-04 |
| A_12_P117014 | W07E11.4     |                                                          | WBGene00044686 | 1.18 | 2.26 | 6.30 | 5.8E-04 |
| A_12_P102549 | F43G6.11a    |                                                          | WBGene00009663 | 1.18 | 2.26 | 6.11 | 6.9E-04 |
| A_12_P113722 | Y18H1A.9     |                                                          | WBGene00021213 | 1.18 | 2.26 | 7.05 | 3.1E-04 |
| A_12_P101305 | T11B7.5.3    |                                                          | WBGene00011708 | 1.18 | 2.26 | 6.63 | 4.3E-04 |
| A_12_P118037 | R12H7.3      | RNA polymerase II elongation factor like [R12H7.3]       | WBGene00004825 | 1.18 | 2.26 | 6.21 | 6.3E-04 |
| A_12_P104766 | C52D10.9     | cyclin A-associated protein [C52D10.9]                   | WBGene00004814 | 1.18 | 2.27 | 6.57 | 4.6E-04 |
| A_12_P109863 | C15C7.1.2    |                                                          | WBGene00015789 | 1.18 | 2.27 | 6.10 | 6.9E-04 |
| A_12_P109827 | F22F4.4      |                                                          | WBGene00017717 | 1.18 | 2.27 | 6.92 | 3.4E-04 |
| A_12_P103612 | M6.1b        |                                                          | WBGene00002056 | 1.19 | 2.28 | 6.30 | 5.8E-04 |
| A_12_P117928 | C34H4.1      |                                                          | WBGene00016424 | 1.19 | 2.28 | 5.80 | 9.2E-04 |
| A_12_P111671 | F36G9.15     |                                                          | WBGene00009491 | 1.19 | 2.28 | 6.54 | 4.7E-04 |
| A_12_P108641 | K11C4.1      | serine/threonine-protein kinase [K11C4.1]                | WBGene00019642 | 1.19 | 2.28 | 5.75 | 9.6E-04 |
| A_12_P118060 | C29F9.2      |                                                          | WBGene00016217 | 1.19 | 2.29 | 7.30 | 2.5E-04 |
| A_12_P104661 | F36H1.10     |                                                          | WBGene00009495 | 1.20 | 2.30 | 6.25 | 6.1E-04 |
| A_12_P112137 | R07E5.4      | Glutaredoxin [R07E5.4]                                   | WBGene00011112 | 1.20 | 2.30 | 6.02 | 7.5E-04 |
| A_12_P106716 | Y87G2A.2     |                                                          | WBGene00013594 | 1.20 | 2.31 | 6.52 | 4.8E-04 |
| A_12_P118539 | F15E6.8      |                                                          | WBGene00017488 | 1.21 | 2.31 | 5.88 | 8.5E-04 |
| A_12_P119038 | A_12_P119038 |                                                          | WBGene00018470 | 1.21 | 2.31 | 7.45 | 2.2E-04 |
| A_12_P102928 | T08E11.6     |                                                          | WBGene00020362 | 1.21 | 2.31 | 5.74 | 9.7E-04 |
| A_12_P107154 | C14A4.7a     |                                                          | WBGene00007558 | 1.21 | 2.31 | 7.70 | 1.8E-04 |
| A_12_P106119 | C24D10.2     |                                                          | WBGene00016054 | 1.21 | 2.32 | 5.72 | 9.9E-04 |
| A_12_P114212 | Y51H7C.9     |                                                          | WBGene00021787 | 1.21 | 2.32 | 6.17 | 6.5E-04 |
| A_12_P114798 | T23F2.3.2    | blt101 protein-barley [T23F2.3.2]                        | WBGene00020736 | 1.22 | 2.32 | 6.64 | 4.3E-04 |
| A_12_P103108 | B0024.2      | collagen [B0024.2]                                       | WBGene00000723 | 1.22 | 2.32 | 6.71 | 4.1E-04 |
| A_12_P104472 | T17A3.8      | protein kinase [T17A3.8]                                 | WBGene00006895 | 1.22 | 2.33 | 8.26 | 1.2E-04 |
| A_12_P100949 | W03D8.2      | ser/thr protein phosphatase [W03D8.2]                    | WBGene00020985 | 1.22 | 2.33 | 6.66 | 4.2E-04 |
| A_12_P117261 | F59H6.4      |                                                          | WBGene00019135 | 1.23 | 2.34 | 8.30 | 1.2E-04 |
| A_12_P104466 | R08E5.2a     | cysteine synthase [R08E5.2a]                             | WBGene00019962 | 1.23 | 2.34 | 5.82 | 9.0E-04 |
| A_12_P106069 | H06H21.9     |                                                          | WBGene00019165 | 1.23 | 2.34 | 6.22 | 6.2E-04 |
| A_12_P118512 | T28C6.8      |                                                          | WBGene00012122 | 1.23 | 2.35 | 7.08 | 3.0E-04 |
| A_12_P103202 | C40H1.6.1    |                                                          | WBGene00008041 | 1.23 | 2.35 | 5.76 | 9.5E-04 |
| A_12_P104217 | B0350.2a.2   |                                                          | WBGene00006780 | 1.23 | 2.35 | 7.70 | 1.8E-04 |
| A_12_P112206 | Y71G12B.17   |                                                          | WBGene00022155 | 1.23 | 2.35 | 7.44 | 2.3E-04 |
| A_12_P119296 | F01D5.9      | Cytochrome P450 [F01D5.9]                                | WBGene00008499 | 1.23 | 2.35 | 6.99 | 3.2E-04 |
| A_12_P105774 | Y73E7A.7     |                                                          | WBGene00000269 | 1.25 | 2.37 | 6.49 | 4.9E-04 |
| A_12_P115723 | C05D2.4.1    | aromatic-L-amino-acid decarboxylase [C05D2.4.1]          | WBGene00000239 | 1.25 | 2.37 | 7.80 | 1.7E-04 |
| A_12_P109610 | Y39G10AR.16  |                                                          | WBGene00021472 | 1.25 | 2.38 | 8.67 | 9.1E-05 |
| A_12_P106209 | Y38E10A.5    |                                                          | WBGene00012583 | 1.25 | 2.38 | 7.89 | 1.6E-04 |
| A_12_P120043 | C31C9.1b     | apical gut membrane protein [C31C9.1a]                   | WBGene00006404 | 1.25 | 2.38 | 8.37 | 1.1E-04 |
| A_12_P104309 | F08G12.2     | WD domain, G-beta repeat (6 domains) [F08G12.2]          | WBGene00008586 | 1.25 | 2.38 | 6.49 | 4.9E-04 |
| A_12_P112207 | C05E7.1      |                                                          | WBGene00007343 | 1.26 | 2.39 | 7.78 | 1.7E-04 |
| A_12_P109382 | B0041.6      | 6-pyruvoyl tetrahydrobiopterin synthase [B0041.6]        | WBGene00015010 | 1.26 | 2.39 | 6.23 | 6.2E-04 |
| A_12_P106074 | Y5F2A.2.2    | Transthyretin-like family [Y5F2A.2.2]                    | WBGene00012383 | 1.26 | 2.39 | 6.13 | 6.8E-04 |
| A_12_P112497 | W06B11.4     | warthog [W06B11.4]                                       | WBGene00001984 | 1.26 | 2.39 | 6.03 | 7.4E-04 |
| A_12_P108059 | C10F3.5      | L-isoaspartyl/D-aspartyl methyltransferase [C10F3.5]     | WBGene00003954 | 1.26 | 2.39 | 5.97 | 7.8E-04 |
| A_12_P116350 | F09E5.14     |                                                          | WBGene00017291 | 1.26 | 2.40 | 7.22 | 2.7E-04 |
| A_12_P117002 | ZC239.16     |                                                          | WBGene00022574 | 1.26 | 2.40 | 7.60 | 2.0E-04 |
| A_12_P112227 | C24H11.1     | Protein phosphatase-1 (PP1) [C24H11.1]                   | WBGene00007700 | 1.26 | 2.40 | 6.64 | 4.3E-04 |
| A_12_P103273 | T03F6.1      | Alcohol/other dehydrogenases, short chain type [T03F6.1] | WBGene00011398 | 1.27 | 2.40 | 5.83 | 9.0E-04 |
| A_12_P110315 | Y8G1A.2.2    | membrane protein; probably a channel protein [Y8G1A.2.2] | WBGene00002135 | 1.27 | 2.41 | 5.76 | 9.5E-04 |
| A_12_P118873 | Y63D3A.4     |                                                          | WBGene00013405 | 1.27 | 2.41 | 6.41 | 5.3E-04 |
| A_12_P119576 | C27B7.2      |                                                          | WBGene00007760 | 1.27 | 2.42 | 6.43 | 5.2E-04 |
| A_12_P115372 | F13H8.12     |                                                          | WBGene00017444 | 1.27 | 2.42 | 6.88 | 3.5E-04 |
| A_12_P113644 | F20D1.1      |                                                          | WBGene00008973 | 1.28 | 2.43 | 5.97 | 7.8E-04 |
| A_12_P109278 | F56C11.6b    | carboxylesterases [F56C11.6a]                            | WBGene00018958 | 1.28 | 2.43 | 8.79 | 8.4E-05 |
| A_12_P107225 | T11G6.3      | bacterial regulatory protein UHPc like [T11G6.3]         | WBGene00011718 | 1.29 | 2.44 | 6.84 | 3.7E-04 |

Bukhari et al, Supplemental Table 1

|              |             |                                                                      |                 |      |      |      |         |
|--------------|-------------|----------------------------------------------------------------------|-----------------|------|------|------|---------|
| A_12_P100870 | T27F2.4     |                                                                      | WBGene00012101  | 1.29 | 2.44 | 7.16 | 2.8E-04 |
| A_12_P101967 | F48C11.3    |                                                                      | WBGene00003741  | 1.29 | 2.44 | 6.47 | 5.0E-04 |
| A_12_P119663 | C01C10.3    |                                                                      | WBGene00015295  | 1.29 | 2.44 | 7.56 | 2.0E-04 |
| A_12_P109613 | T23F11.6    |                                                                      | WBGene00011957  | 1.29 | 2.45 | 6.31 | 5.7E-04 |
| A_12_P113330 | W10D9.3     |                                                                      | WBGene00021131  | 1.29 | 2.45 | 5.81 | 9.1E-04 |
| A_12_P116773 | F42C5.7     |                                                                      | WBGene00001713  | 1.29 | 2.45 | 8.10 | 1.4E-04 |
| A_12_P102573 | C47A10.1    | multidrug resistance protein (p-glycoprotein) (2 domains) [C47A10.1] | WBGene00004003  | 1.29 | 2.45 | 8.27 | 1.2E-04 |
| A_12_P116068 | ZK84.2      |                                                                      | WBGene00022650  | 1.30 | 2.45 | 7.48 | 2.2E-04 |
| A_12_P111832 | F55G11.2    |                                                                      | WBGene00010123  | 1.30 | 2.46 | 6.32 | 5.7E-04 |
| A_12_P104173 | F36H12.9    |                                                                      | WBGene00020072  | 1.30 | 2.46 | 6.04 | 7.3E-04 |
| A_12_P108927 | ZK287.9     |                                                                      | WBGene00013968  | 1.30 | 2.47 | 7.89 | 1.6E-04 |
| A_12_P111007 | Y11D7A.5    |                                                                      | WBGene00012429  | 1.30 | 2.47 | 6.94 | 3.4E-04 |
| A_12_P101771 | F37C4.5a.3  |                                                                      | WBGene00018145  | 1.30 | 2.47 | 6.32 | 5.7E-04 |
| A_12_P100733 | K10D11.2    |                                                                      | WBGene00010746  | 1.31 | 2.47 | 5.72 | 9.9E-04 |
| A_12_P119518 | ZK930.7     |                                                                      | WBGene00014157  | 1.31 | 2.47 | 7.18 | 2.8E-04 |
| A_12_P102884 | F15B9.3     |                                                                      | WBGene00001389  | 1.31 | 2.48 | 8.08 | 1.4E-04 |
| A_12_P108898 | F40F9.9     | MIP transmembrane protein [F40F9.9]                                  | WBGene00000172  | 1.32 | 2.49 | 6.95 | 3.3E-04 |
| A_12_P114131 | W10G6.3.1   | intermediate filament protein [W10G6.3.1]                            | WBGene00003485  | 1.32 | 2.50 | 5.99 | 7.7E-04 |
| A_12_P104600 | B0304.1b    | helix-loop-helix transcription factor [B0304.1b]                     | WBGene00001948  | 1.32 | 2.50 | 7.38 | 2.3E-04 |
| A_12_P118395 | ZK520.5.1   | Peptidyl-prolyl cis-trans isomerases [ZK520.5.1]                     | WBGene00000878  | 1.32 | 2.50 | 5.95 | 8.0E-04 |
| A_12_P112144 | F13E6.3     |                                                                      | WBGene00008747  | 1.33 | 2.52 | 6.26 | 6.0E-04 |
| A_12_P112527 | ZC64.2.2    |                                                                      | WBGene00022515  | 1.33 | 2.52 | 6.79 | 3.8E-04 |
| A_12_P112488 | ZK546.4     |                                                                      | WBGene00022761  | 1.33 | 2.52 | 6.46 | 5.0E-04 |
| A_12_P104011 | F55C10.5    |                                                                      | WBGene00010109  | 1.33 | 2.52 | 6.68 | 4.2E-04 |
| A_12_P105434 | F47B3.1     | protein-tyrosine phosphatase [F47B3.1]                               | WBGene00018530  | 1.34 | 2.52 | 7.21 | 2.7E-04 |
| A_12_P116324 | F26D11.1    | gluconokinase [F26D11.1]                                             | WBGene00017818  | 1.34 | 2.52 | 6.14 | 6.7E-04 |
| A_12_P103775 | ZK1320.11   |                                                                      | WBGene00014259  | 1.34 | 2.52 | 7.05 | 3.1E-04 |
| A_12_P115848 | T08B6.5     | RNA binding protein [T08B6.5]                                        | WBGene00020354  | 1.34 | 2.53 | 6.21 | 6.3E-04 |
| A_12_P114644 | F21D9.3     |                                                                      | WBGene00009017  | 1.34 | 2.53 | 7.03 | 3.1E-04 |
| A_12_P113136 | F52E4.5     |                                                                      | WBGene00018702  | 1.34 | 2.53 | 7.22 | 2.7E-04 |
| A_12_P110841 | T14G12.3    |                                                                      | WBGene00006408  | 1.34 | 2.53 | 5.79 | 9.3E-04 |
| A_12_P104849 | T20D4.7     |                                                                      | WBGene00020613  | 1.34 | 2.53 | 8.27 | 1.2E-04 |
| A_12_P105172 | M03F4.7b    | calcium binding protein [M03F4.7a.1]                                 | WBGene00019760  | 1.34 | 2.54 | 6.74 | 4.0E-04 |
| A_12_P109209 | F23B2.11.2  | lysosomal carboxypeptidase [F23B2.11.2]                              | WBGene00003958  | 1.34 | 2.54 | 6.74 | 4.0E-04 |
| A_12_P102892 | T13F2.12    |                                                                      | WBGene00011749  | 1.34 | 2.54 | 6.92 | 3.4E-04 |
| A_12_P111884 | B0222.7     |                                                                      | WBGene00000718  | 1.35 | 2.54 | 6.20 | 6.3E-04 |
| A_12_P117657 | C14C11.1    |                                                                      | WBGene00015765  | 1.35 | 2.54 | 5.87 | 8.6E-04 |
| A_12_P103781 | C26F1.5     |                                                                      | WBGene00001719  | 1.35 | 2.54 | 6.08 | 7.1E-04 |
| A_12_P100799 | F42A9.8     |                                                                      | WBGene00018337  | 1.35 | 2.55 | 6.18 | 6.5E-04 |
| A_12_P103151 | F46H6.2c    |                                                                      | WBGene00000959  | 1.35 | 2.55 | 5.96 | 7.9E-04 |
| A_12_P113402 | F59D12.5    |                                                                      | WBGene00010332  | 1.35 | 2.55 | 6.64 | 4.3E-04 |
| A_12_P112073 | Y106G6E.4   | 5-formyltetrahydrofolate cyclo-ligase [Y106G6E.4]                    | WBGene00013708  | 1.35 | 2.56 | 6.29 | 5.8E-04 |
| A_12_P104220 | Y43F8B.2b   |                                                                      | WBGene00012813  | 1.35 | 2.56 | 7.41 | 2.3E-04 |
| A_12_P118179 | C01B4.8     |                                                                      | WBGene00021220  | 1.36 | 2.56 | 8.45 | 1.1E-04 |
| A_12_P115483 | T02H6.7     |                                                                      | WBGene00020177  | 1.36 | 2.56 | 7.54 | 2.1E-04 |
| A_12_P117636 | T10E10.2.1  | collagen [T10E10.2.1]                                                | WBGene00000740  | 1.36 | 2.56 | 6.57 | 4.6E-04 |
| A_12_P117120 | T05F1.5     |                                                                      | WBGene00011491  | 1.36 | 2.57 | 8.22 | 1.3E-04 |
| A_12_P104851 | F26G1.5     |                                                                      | WBGene00017841  | 1.36 | 2.57 | 8.72 | 8.8E-05 |
| A_12_P117145 | C07H6.9     |                                                                      | WBGene00015582  | 1.36 | 2.57 | 7.39 | 2.3E-04 |
| A_12_P110127 | C04F12.5    |                                                                      | WBGene00007299  | 1.36 | 2.57 | 5.91 | 8.3E-04 |
| A_12_P102192 | T19C3.9     |                                                                      | WBGene00020566  | 1.36 | 2.57 | 6.55 | 4.7E-04 |
| A_12_P104866 | Y46G5A.19.2 | spermidine synthesis [Y46G5A.19.2]                                   | WBGene00012909  | 1.37 | 2.58 | 5.89 | 8.4E-04 |
| A_12_P111889 | C33F10.4    |                                                                      | WBGene000050941 | 1.37 | 2.58 | 5.77 | 9.4E-04 |
| A_12_P111439 | Y54G2A.14   |                                                                      | WBGene00021879  | 1.37 | 2.58 | 7.94 | 1.5E-04 |
| A_12_P119150 | F11C3.3.8   | myosin heavy chain [F11C3.3.8]                                       | WBGene00000888  | 1.37 | 2.58 | 6.46 | 5.0E-04 |
| A_12_P120119 | ZK856.7.2   |                                                                      | WBGene00014108  | 1.37 | 2.59 | 6.80 | 3.8E-04 |
| A_12_P112709 | T05B11.1    |                                                                      | WBGene00020245  | 1.37 | 2.59 | 7.62 | 2.0E-04 |
| A_12_P119813 | C05G5.4.1   | succinyl-CoA synthetase [C05G5.4.1]                                  | WBGene00007350  | 1.37 | 2.59 | 6.40 | 5.3E-04 |
| A_12_P102050 | ZC317.6     |                                                                      | WBGene00022589  | 1.38 | 2.60 | 6.37 | 5.4E-04 |
| A_12_P117207 | Y73C8B.3    |                                                                      | WBGene00022260  | 1.38 | 2.60 | 6.50 | 4.9E-04 |
| A_12_P118090 | K10C9.7     |                                                                      | WBGene00019626  | 1.38 | 2.60 | 7.48 | 2.2E-04 |
| A_12_P110129 | C03F11.3    | glycoprotein [C03F11.3]                                              | WBGene00015389  | 1.38 | 2.60 | 6.35 | 5.5E-04 |
| A_12_P108485 | F38H4.6     |                                                                      | WBGene00009550  | 1.38 | 2.61 | 6.49 | 4.9E-04 |
| A_12_P116869 | F17C8.4     | Ras-like protein [F17C8.4]                                           | WBGene00004311  | 1.39 | 2.61 | 6.90 | 3.5E-04 |
| A_12_P100755 | AH9.2       |                                                                      | WBGene00000797  | 1.39 | 2.61 | 6.24 | 6.1E-04 |

Bukhari et al, Supplemental Table 1

|              |              |                                                     |                |      |      |       |         |
|--------------|--------------|-----------------------------------------------------|----------------|------|------|-------|---------|
| A_12_P106246 | C06H5.7      |                                                     | WBGene00007395 | 1.39 | 2.62 | 6.15  | 6.7E-04 |
| A_12_P114436 | ZC204.14     |                                                     | WBGene00022564 | 1.39 | 2.62 | 6.04  | 7.4E-04 |
| A_12_P109125 | C18A11.1     |                                                     | WBGene00015947 | 1.40 | 2.64 | 9.07  | 7.0E-05 |
| A_12_P118792 | C50F4.10     | serine/threonine kinase [C50F4.10]                  | WBGene00008235 | 1.40 | 2.64 | 5.76  | 9.5E-04 |
| A_12_P113830 | T02B11.3a.2  |                                                     | WBGene00020155 | 1.40 | 2.65 | 7.56  | 2.0E-04 |
| A_12_P117176 | C31E10.7.1   | cytochrome b5 [C31E10.7.1]                          | WBGene00007848 | 1.40 | 2.65 | 6.77  | 3.9E-04 |
| A_12_P110529 | F53C11.3     | 2,4-dienoyl-CoA reductase [F53C11.3]                | WBGene00009973 | 1.40 | 2.65 | 6.38  | 5.4E-04 |
| A_12_P107734 | C18H7.7      |                                                     | WBGene00015997 | 1.41 | 2.65 | 7.02  | 3.1E-04 |
| A_12_P109458 | C46F9.1      |                                                     | WBGene00016717 | 1.41 | 2.65 | 8.00  | 1.5E-04 |
| A_12_P112839 | F11C7.2      |                                                     | WBGene00017376 | 1.41 | 2.65 | 5.90  | 8.4E-04 |
| A_12_P103011 | Y41D4B.17    |                                                     | WBGene00021519 | 1.41 | 2.66 | 9.14  | 6.7E-05 |
| A_12_P118161 | C26F1.7      |                                                     | WBGene00016150 | 1.41 | 2.66 | 8.20  | 1.3E-04 |
| A_12_P109619 | Y69E1A.5     | Phosphatidylethanolamine-binding protein [Y69E1A.5] | WBGene00013477 | 1.42 | 2.68 | 5.74  | 9.7E-04 |
| A_12_P116675 | F07C3.9      |                                                     | WBGene00017197 | 1.42 | 2.68 | 9.65  | 4.8E-05 |
| A_12_P105083 | R12E2.7      |                                                     | WBGene00020033 | 1.42 | 2.68 | 5.98  | 7.8E-04 |
| A_12_P117948 | T14G10.3     | Transthyretin-like family [T14G10.3]                | WBGene00011773 | 1.43 | 2.69 | 5.94  | 8.0E-04 |
| A_12_P111348 | R07E3.4      | ADP,ATP carrier protein [R07E3.4]                   | WBGene00011105 | 1.43 | 2.69 | 8.87  | 8.0E-05 |
| A_12_P101282 | H34I24.1     |                                                     | WBGene00019260 | 1.43 | 2.70 | 6.11  | 6.9E-04 |
| A_12_P115877 | F54C1.9      |                                                     | WBGene00006058 | 1.43 | 2.70 | 8.11  | 1.4E-04 |
| A_12_P117368 | VK10D6R.1    |                                                     | WBGene00012152 | 1.43 | 2.70 | 7.36  | 2.4E-04 |
| A_12_P117366 | Y69H2.3d.2   |                                                     | WBGene00013481 | 1.44 | 2.70 | 7.10  | 2.9E-04 |
| A_12_P110902 | K11D12.7     |                                                     | WBGene00019647 | 1.44 | 2.70 | 6.78  | 3.8E-04 |
| A_12_P115762 | F36H12.4     |                                                     | WBGene00018120 | 1.44 | 2.71 | 6.96  | 3.3E-04 |
| A_12_P110113 | ZC416.6      | protease [ZC416.6]                                  | WBGene00022610 | 1.44 | 2.71 | 6.20  | 6.3E-04 |
| A_12_P110515 | F29B9.7      |                                                     | WBGene00017922 | 1.44 | 2.71 | 5.89  | 8.4E-04 |
| A_12_P110773 | C29F5.1      |                                                     | WBGene00016210 | 1.44 | 2.71 | 7.30  | 2.5E-04 |
| A_12_P113250 | F39H2.1.1    |                                                     | WBGene00009562 | 1.44 | 2.72 | 9.53  | 5.2E-05 |
| A_12_P106423 | Y71D11A.3b   |                                                     | WBGene00022104 | 1.45 | 2.73 | 7.50  | 2.1E-04 |
| A_12_P112151 | K02E7.11     |                                                     | WBGene00019315 | 1.45 | 2.74 | 5.94  | 8.0E-04 |
| A_12_P116787 | R13A5.10     |                                                     | WBGene00020052 | 1.45 | 2.74 | 6.57  | 4.6E-04 |
| A_12_P112981 | Y92C3B.1     |                                                     | WBGene00022357 | 1.45 | 2.74 | 6.24  | 6.1E-04 |
| A_12_P111149 | ZK945.1.2    | esterase [ZK945.1.2]                                | WBGene00014164 | 1.46 | 2.76 | 7.66  | 1.9E-04 |
| A_12_P103175 | C05E11.5     | ammonium transporter [C05E11.5]                     | WBGene00000136 | 1.47 | 2.76 | 6.87  | 3.6E-04 |
| A_12_P109978 | T04A6.1b     |                                                     | WBGene00020200 | 1.47 | 2.76 | 8.39  | 1.1E-04 |
| A_12_P100320 | ZK930.4      |                                                     | WBGene00014154 | 1.48 | 2.78 | 7.11  | 2.9E-04 |
| A_12_P106004 | C12D12.2a.3  | excitatory amino acid transporter [C12D12.2a.3]     | WBGene00001620 | 1.48 | 2.78 | 8.54  | 1.0E-04 |
| A_12_P102062 | ZK899.2      |                                                     | WBGene00014141 | 1.48 | 2.79 | 5.78  | 9.4E-04 |
| A_12_P100934 | ZK520.2.2    |                                                     | WBGene00004796 | 1.48 | 2.79 | 7.82  | 1.7E-04 |
| A_12_P104424 | F01D5.2      |                                                     | WBGene00008493 | 1.48 | 2.79 | 8.28  | 1.2E-04 |
| A_12_P111839 | C24B9.9.1    |                                                     | WBGene00016052 | 1.48 | 2.79 | 7.13  | 2.9E-04 |
| A_12_P103560 | Y53F4A.2     |                                                     | WBGene00013148 | 1.49 | 2.80 | 7.23  | 2.7E-04 |
| A_12_P112202 | C35C5.9      |                                                     | WBGene00007958 | 1.49 | 2.80 | 7.35  | 2.4E-04 |
| A_12_P119253 | C24H10.1     |                                                     | WBGene00016067 | 1.49 | 2.80 | 6.24  | 6.1E-04 |
| A_12_P119395 | C03G5.7      |                                                     | WBGene00001448 | 1.49 | 2.81 | 5.95  | 8.0E-04 |
| A_12_P112512 | R13F6.3      | 7TM chemoreceptor, srv family [R13F6.3]             | WBGene00005712 | 1.49 | 2.82 | 7.15  | 2.8E-04 |
| A_12_P118449 | Y57G7A.5     |                                                     | WBGene00021968 | 1.49 | 2.82 | 7.23  | 2.6E-04 |
| A_12_P107826 | Y25C1A.6.1   |                                                     | WBGene00021293 | 1.49 | 2.82 | 6.05  | 7.3E-04 |
| A_12_P101068 | Y54G11A.5a   | Catalase [Y54G11A.5a]                               | WBGene00000831 | 1.50 | 2.82 | 5.99  | 7.7E-04 |
| A_12_P105324 | T01B11.4     | ADP/ATP translocase [T01B11.4]                      | WBGene00020140 | 1.50 | 2.82 | 7.01  | 3.2E-04 |
| A_12_P110815 | F46A8.10     |                                                     | WBGene00009753 | 1.50 | 2.83 | 5.80  | 9.2E-04 |
| A_12_P111406 | A_12_P111406 |                                                     | WBGene00021627 | 1.50 | 2.83 | 6.31  | 5.7E-04 |
| A_12_P107494 | ZK228.4      |                                                     | WBGene00013947 | 1.50 | 2.83 | 6.30  | 5.8E-04 |
| A_12_P111621 | C48E7.10     |                                                     | WBGene00005000 | 1.50 | 2.83 | 10.30 | 3.2E-05 |
| A_12_P105765 | C49F8.3      |                                                     | WBGene00008215 | 1.50 | 2.84 | 6.43  | 5.2E-04 |
| A_12_P118428 | ZK1251.2     |                                                     | WBGene00002090 | 1.50 | 2.84 | 7.55  | 2.1E-04 |
| A_12_P108770 | Y26E6A.3     |                                                     | WBGene00012514 | 1.50 | 2.84 | 6.74  | 4.0E-04 |
| A_12_P103999 | F40F8.4      |                                                     | WBGene00009577 | 1.51 | 2.84 | 9.46  | 5.4E-05 |
| A_12_P101007 | ZK666.2      |                                                     | WBGene00014042 | 1.51 | 2.84 | 7.02  | 3.1E-04 |
| A_12_P110436 | ZK637.13.2   | Globin [ZK637.13.2]                                 | WBGene00014030 | 1.51 | 2.84 | 5.73  | 9.8E-04 |
| A_12_P100588 | F57A10.4     |                                                     | WBGene00010185 | 1.51 | 2.84 | 7.82  | 1.7E-04 |
| A_12_P108647 | F11E6.5.1    | GNS1/SUR4 family [F11E6.5.1]                        | WBGene00001240 | 1.51 | 2.85 | 8.77  | 8.5E-05 |
| A_12_P102824 | Y15E3A.5     |                                                     | WBGene00012444 | 1.51 | 2.85 | 7.25  | 2.6E-04 |
| A_12_P100345 | F59F4.2.2    |                                                     | WBGene00010337 | 1.51 | 2.85 | 5.73  | 9.8E-04 |
| A_12_P109661 | T22E5.1      |                                                     | WBGene00020690 | 1.51 | 2.85 | 6.12  | 6.9E-04 |
| A_12_P102145 | C01G6.2      |                                                     | WBGene00007224 | 1.51 | 2.86 | 8.54  | 9.9E-05 |

Bukhari et al, Supplemental Table 1

|              |              |                                                       |                 |      |      |       |         |
|--------------|--------------|-------------------------------------------------------|-----------------|------|------|-------|---------|
| A_12_P100296 | F17C8.2      | cuticular collagen [F17C8.2]                          | WBGene00000664  | 1.52 | 2.86 | 6.12  | 6.8E-04 |
| A_12_P101584 | Y116A8C.29   |                                                       | WBGene00013806  | 1.52 | 2.86 | 5.72  | 9.9E-04 |
| A_12_P100602 | K09H9.7      |                                                       | WBGene00019598  | 1.52 | 2.87 | 8.25  | 1.2E-04 |
| A_12_P119647 | F47B10.5     |                                                       | WBGene00009816  | 1.52 | 2.87 | 9.04  | 7.1E-05 |
| A_12_P108800 | W08F4.6      |                                                       | WBGene00021095  | 1.53 | 2.89 | 7.04  | 3.1E-04 |
| A_12_P117939 | C24H10.5     | EF-hand calcium binding protein [C24H10.5]            | WBGene00006861  | 1.53 | 2.89 | 5.96  | 7.9E-04 |
| A_12_P113663 | F14B8.2      |                                                       | WBGene00017445  | 1.53 | 2.89 | 6.43  | 5.2E-04 |
| A_12_P115078 | Y66A7A.7     |                                                       | WBGene00013426  | 1.53 | 2.90 | 6.95  | 3.3E-04 |
| A_12_P114832 | F39B2.5      | Src homology domain 2 [F39B2.5]                       | WBGene00009556  | 1.54 | 2.90 | 5.94  | 8.1E-04 |
| A_12_P103152 | R03E9.1      | human Max-interacting bHLH-Zip protein [R03E9.1]      | WBGene00003163  | 1.54 | 2.90 | 7.71  | 1.8E-04 |
| A_12_P117206 | K01H12.2     | ADP/ATP carrier protein [K01H12.2]                    | WBGene00010485  | 1.54 | 2.91 | 7.11  | 2.9E-04 |
| A_12_P119854 | Y22D7AL.6    |                                                       | WBGene00021245  | 1.54 | 2.91 | 6.00  | 7.6E-04 |
| A_12_P118397 | F55G11.8     |                                                       | WBGene00010128  | 1.54 | 2.91 | 7.22  | 2.7E-04 |
| A_12_P119460 | F25B4.9      |                                                       | WBGene00017772  | 1.54 | 2.91 | 5.82  | 9.0E-04 |
| A_12_P106013 | C48E7.1      |                                                       | WBGene00016749  | 1.55 | 2.92 | 10.42 | 3.0E-05 |
| A_12_P109729 | C37H5.9c.2   |                                                       | WBGene00003528  | 1.55 | 2.94 | 6.85  | 3.6E-04 |
| A_12_P119438 | Y71G12B.22   |                                                       | WBGene00022157  | 1.55 | 2.94 | 8.79  | 8.4E-05 |
| A_12_P116343 | Y43C5B.3     | Mitochondrial carrier proteins (2 domains) [Y43C5B.3] | WBGene00012786  | 1.56 | 2.94 | 6.87  | 3.6E-04 |
| A_12_P118020 | F46E10.2.2   |                                                       | WBGene00018489  | 1.56 | 2.95 | 6.91  | 3.4E-04 |
| A_12_P117952 | C31C9.7      |                                                       | WBGene00007841  | 1.56 | 2.95 | 6.05  | 7.3E-04 |
| A_12_P113696 | C38C3.5c.1   | actin depolymerizing factor [C38C3.5b]                | WBGene00006794  | 1.57 | 2.97 | 6.53  | 4.7E-04 |
| A_12_P108048 | R148.6.1     |                                                       | WBGene00006452  | 1.57 | 2.97 | 6.94  | 3.4E-04 |
| A_12_P105289 | C18A11.2     |                                                       | WBGene00015948  | 1.57 | 2.97 | 6.19  | 6.4E-04 |
| A_12_P105492 | ZC101.2a     | UNC-52 membrane proteoglycan [ZC101.2a]               | WBGene00006787  | 1.57 | 2.97 | 6.10  | 6.9E-04 |
| A_12_P111574 | K02F3.4.2    |                                                       | WBGene00019327  | 1.58 | 2.98 | 6.94  | 3.3E-04 |
| A_12_P117246 | C44B12.2.3   | osteonectin [C44B12.2.3]                              | WBGene00003893  | 1.58 | 2.99 | 6.54  | 4.7E-04 |
| A_12_P112516 | Y47D3A.10    |                                                       | WBGene00006553  | 1.58 | 2.99 | 10.72 | 2.5E-05 |
| A_12_P112068 | F23H12.8     |                                                       | WBGene00009096  | 1.58 | 2.99 | 7.34  | 2.4E-04 |
| A_12_P103725 | Y54E2A.9     |                                                       | WBGene00013194  | 1.58 | 3.00 | 7.05  | 3.1E-04 |
| A_12_P101498 | Y51H7C.13    |                                                       | WBGene00021791  | 1.59 | 3.01 | 8.66  | 9.2E-05 |
| A_12_P111940 | T13F2.8      | caveolin [T13F2.8]                                    | WBGene00000301  | 1.59 | 3.01 | 6.05  | 7.2E-04 |
| A_12_P117188 | C46G7.2      |                                                       | WBGene00016722  | 1.60 | 3.03 | 6.68  | 4.2E-04 |
| A_12_P114625 | K10D6.2c     |                                                       | WBGene00010742  | 1.60 | 3.03 | 6.63  | 4.4E-04 |
| A_12_P117107 | F08D12.7     |                                                       | WBGene00017250  | 1.60 | 3.03 | 9.77  | 4.5E-05 |
| A_12_P120389 | Y57G11A.2    |                                                       | WBGene00013290  | 1.60 | 3.03 | 5.74  | 9.8E-04 |
| A_12_P108683 | C14F11.5.2   | heat shock protein [C14F11.5.2]                       | WBGene00002024  | 1.60 | 3.04 | 8.07  | 1.4E-04 |
| A_12_P103070 | Y41CA.6      |                                                       | WBGene00012753  | 1.60 | 3.04 | 6.22  | 6.2E-04 |
| A_12_P118073 | T22E5.5.1    | troponin T-like protein [T22E5.5.1]                   | WBGene00003495  | 1.60 | 3.04 | 6.35  | 5.6E-04 |
| A_12_P107770 | R07E4.3      |                                                       | WBGene00019937  | 1.61 | 3.05 | 6.21  | 6.3E-04 |
| A_12_P108919 | F44G4.5      |                                                       | WBGene00009714  | 1.61 | 3.05 | 7.71  | 1.8E-04 |
| A_12_P118290 | C02F12.5     | homeobox; tissue factor pathway inhibitor [C02F12.5]  | WBGene00015355  | 1.61 | 3.06 | 10.18 | 3.5E-05 |
| A_12_P118402 | Y62E10A.5    |                                                       | WBGene00000093  | 1.61 | 3.06 | 5.75  | 9.6E-04 |
| A_12_P112843 | C25D7.1      |                                                       | WBGene00007714  | 1.61 | 3.06 | 6.53  | 4.7E-04 |
| A_12_P104139 | ZK1025.2     |                                                       | WBGene00014182  | 1.62 | 3.06 | 6.13  | 6.8E-04 |
| A_12_P100480 | D2013.10     |                                                       | WBGene00006520  | 1.62 | 3.07 | 5.85  | 8.7E-04 |
| A_12_P115716 | Y52E8A.2     |                                                       | WBGene00021795  | 1.62 | 3.07 | 6.50  | 4.9E-04 |
| A_12_P115538 | K01A2.8a     |                                                       | WBGene00019282  | 1.62 | 3.07 | 9.87  | 4.2E-05 |
| A_12_P104889 | F53B6.9      |                                                       | WBGene00009964  | 1.62 | 3.08 | 6.22  | 6.2E-04 |
| A_12_P119001 | Y11D7A.3     |                                                       | WBGene00012428  | 1.62 | 3.08 | 6.61  | 4.4E-04 |
| A_12_P109953 | R09A8.4      | cuticle collagen [R09A8.4]                            | WBGene00000755  | 1.62 | 3.08 | 6.38  | 5.4E-04 |
| A_12_P118538 | AH10.1       | 4-coumarate:coenzyme A ligase [AH10.1]                | WBGene00007082  | 1.63 | 3.09 | 8.71  | 8.9E-05 |
| A_12_P107850 | Y66A7A.4     |                                                       | WBGene00013424  | 1.63 | 3.10 | 6.29  | 5.9E-04 |
| A_12_P116691 | A_12_P116691 |                                                       | WBGene000045387 | 1.64 | 3.11 | 5.83  | 8.9E-04 |
| A_12_P120310 | C01G12.3     |                                                       | WBGene00007244  | 1.64 | 3.11 | 6.19  | 6.4E-04 |
| A_12_P110600 | ZK970.8      |                                                       | WBGene00014174  | 1.64 | 3.11 | 8.51  | 1.0E-04 |
| A_12_P103747 | Y46G5A.22a   |                                                       | WBGene00012912  | 1.64 | 3.11 | 10.09 | 3.7E-05 |
| A_12_P113366 | C45G9.4      |                                                       | WBGene00016675  | 1.64 | 3.12 | 5.80  | 9.1E-04 |
| A_12_P101016 | Y51B9A.5     |                                                       | WBGene00013087  | 1.65 | 3.13 | 6.14  | 6.7E-04 |
| A_12_P107884 | Y44A6D.5     | Aminotransferase class IV [Y44A6D.5]                  | WBGene00012855  | 1.65 | 3.14 | 6.15  | 6.6E-04 |
| A_12_P103321 | T16G12.8     |                                                       | WBGene00011809  | 1.66 | 3.15 | 6.55  | 4.7E-04 |
| A_12_P101494 | F10C1.7c.5   | Intermediate filament protein [F10C1.7a.1]            | WBGene00002054  | 1.66 | 3.16 | 6.24  | 6.1E-04 |
| A_12_P109557 | K02D7.1      | phosphorylase [K02D7.1]                               | WBGene00019298  | 1.66 | 3.17 | 7.40  | 2.3E-04 |
| A_12_P106177 | F10G2.4      |                                                       | WBGene00017365  | 1.67 | 3.17 | 7.64  | 1.9E-04 |
| A_12_P112478 | EEED8.8      |                                                       | WBGene00003583  | 1.67 | 3.18 | 7.59  | 2.0E-04 |
| A_12_P119778 | W02B12.1     | phospholipase [W02B12.1]                              | WBGene00012201  | 1.67 | 3.18 | 7.02  | 3.1E-04 |

Bukhari et al, Supplemental Table 1

|              |               |                                                        |                |      |      |       |         |
|--------------|---------------|--------------------------------------------------------|----------------|------|------|-------|---------|
| A_12_P114746 | F53H8.3       | glucose transporter [F53H8.3]                          | WBGene00018779 | 1.67 | 3.18 | 8.46  | 1.1E-04 |
| A_12_P108681 | K10B3.7.4     |                                                        | WBGene00001685 | 1.67 | 3.19 | 6.08  | 7.1E-04 |
| A_12_P110903 | R04A9.4       | eukaryotic initiation factor 4E (EIF-4E) [R04A9.4]     | WBGene00002060 | 1.67 | 3.19 | 6.10  | 7.0E-04 |
| A_12_P101218 | T27A1.5.1     |                                                        | WBGene00020837 | 1.67 | 3.19 | 11.42 | 1.7E-05 |
| A_12_P100540 | K07A3.1.4     | fructose-bisphosphatase [K07A3.1.4]                    | WBGene00001404 | 1.68 | 3.20 | 5.92  | 8.2E-04 |
| A_12_P103606 | F47B7.1       |                                                        | WBGene00018532 | 1.68 | 3.20 | 7.10  | 2.9E-04 |
| A_12_P111504 | F14B8.4       |                                                        | WBGene00017446 | 1.68 | 3.21 | 6.16  | 6.6E-04 |
| A_12_P119541 | C52D10.8      | cyclin A-associated protein [C52D10.8]                 | WBGene00004819 | 1.69 | 3.22 | 9.24  | 6.2E-05 |
| A_12_P103481 | F20A1.1       |                                                        | WBGene00017613 | 1.69 | 3.22 | 8.52  | 1.0E-04 |
| A_12_P107454 | F45H10.4      |                                                        | WBGene00009741 | 1.69 | 3.22 | 6.33  | 5.6E-04 |
| A_12_P109401 | F55B11.3      |                                                        | WBGene00010085 | 1.69 | 3.22 | 6.19  | 6.4E-04 |
| A_12_P101614 | F45E4.1       | ADP-ribosylation factor [F45E4.1]                      | WBGene00000190 | 1.69 | 3.23 | 6.61  | 4.4E-04 |
| A_12_P102000 | F49F1.5.1     |                                                        | WBGene00018645 | 1.69 | 3.23 | 6.12  | 6.8E-04 |
| A_12_P116206 | T01G6.7.1     | zinc finger protein [T01G6.7.1]                        | WBGene00003645 | 1.69 | 3.23 | 9.97  | 4.0E-05 |
| A_12_P109899 | T03F1.11      |                                                        | WBGene00020192 | 1.69 | 3.23 | 6.41  | 5.3E-04 |
| A_12_P100859 | F58B3.9       | Transthyretin-like family [F58B3.9]                    | WBGene00010234 | 1.69 | 3.24 | 7.19  | 2.7E-04 |
| A_12_P103586 | K08C9.4       |                                                        | WBGene00000641 | 1.70 | 3.24 | 6.59  | 4.5E-04 |
| A_12_P114182 | F10D2.9       | stearyl-CoA desaturase [F10D2.9]                       | WBGene00001399 | 1.70 | 3.24 | 7.55  | 2.1E-04 |
| A_12_P105372 | K12H6.2       |                                                        | WBGene00019683 | 1.70 | 3.24 | 5.95  | 8.0E-04 |
| A_12_P105214 | T27E4.3       | heat shock protein HSP16-48 [T27E4.3]                  | WBGene00002020 | 1.70 | 3.26 | 7.11  | 2.9E-04 |
| A_12_P116092 | Y34F4.3       |                                                        | WBGene00021338 | 1.70 | 3.26 | 7.13  | 2.9E-04 |
| A_12_P104386 | F40D4.13      |                                                        | WBGene00009572 | 1.71 | 3.27 | 6.81  | 3.7E-04 |
| A_12_P110793 | F49D11.7      |                                                        | WBGene00018631 | 1.72 | 3.28 | 7.41  | 2.3E-04 |
| A_12_P109836 | K11G9.6       |                                                        | WBGene00003473 | 1.72 | 3.29 | 6.19  | 6.4E-04 |
| A_12_P106521 | K08D8.5       |                                                        | WBGene00010659 | 1.72 | 3.29 | 6.21  | 6.3E-04 |
| A_12_P107196 | C47A4.3       | Ser/Thr protein phosphatase [C47A4.3]                  | WBGene00008124 | 1.72 | 3.30 | 10.46 | 2.9E-05 |
| A_12_P102399 | C18B2.5a.1    |                                                        | WBGene00015956 | 1.72 | 3.30 | 8.32  | 1.2E-04 |
| A_12_P104338 | F37C12.10     |                                                        | WBGene00018153 | 1.72 | 3.30 | 6.46  | 5.0E-04 |
| A_12_P119211 | T07H6.3b.2    | collagen [T07H6.3a.1]                                  | WBGene00000739 | 1.72 | 3.30 | 9.68  | 4.7E-05 |
| A_12_P113758 | C48B6.9       |                                                        | WBGene00016745 | 1.73 | 3.31 | 6.66  | 4.3E-04 |
| A_12_P113815 | Y62H9A.5      |                                                        | WBGene00013393 | 1.73 | 3.31 | 6.90  | 3.5E-04 |
| A_12_P100093 | R02D5.3       |                                                        | WBGene00010977 | 1.73 | 3.32 | 10.17 | 3.5E-05 |
| A_12_P103454 | Y41C4A.16     | collagen [Y41C4A.16]                                   | WBGene00000670 | 1.73 | 3.32 | 6.35  | 5.5E-04 |
| A_12_P117593 | F45C12.4      |                                                        | WBGene00018435 | 1.73 | 3.33 | 9.75  | 4.5E-05 |
| A_12_P117547 | ZK909.6       |                                                        | WBGene00014150 | 1.73 | 3.33 | 6.49  | 4.9E-04 |
| A_12_P119063 | C25E10.8      |                                                        | WBGene00016097 | 1.74 | 3.33 | 7.27  | 2.6E-04 |
| A_12_P105407 | T05C12.3      | 2,4-dienoyl-CoA reductase [T05C12.3]                   | WBGene00011467 | 1.74 | 3.34 | 6.12  | 6.8E-04 |
| A_12_P100243 | M28.10.1      |                                                        | WBGene00010901 | 1.74 | 3.34 | 6.11  | 6.9E-04 |
| A_12_P108584 | F58G6.3       |                                                        | WBGene00010274 | 1.74 | 3.34 | 7.14  | 2.9E-04 |
| A_12_P116215 | C09B8.6a.1    | Small heat shock protein [C09B8.6a.1]                  | WBGene00002023 | 1.74 | 3.34 | 5.89  | 8.5E-04 |
| A_12_P117382 | R13A5.3       |                                                        | WBGene00020047 | 1.74 | 3.35 | 7.86  | 1.6E-04 |
| A_12_P115010 | ZK1098.9      |                                                        | WBGene00014225 | 1.74 | 3.35 | 6.62  | 4.4E-04 |
| A_12_P119591 | F55C10.3      | collagen [F55C10.3]                                    | WBGene00000728 | 1.74 | 3.35 | 9.72  | 4.6E-05 |
| A_12_P119579 | K09A9.5.2     | NADH-ubiquinone oxidoreductase 49K subunit [K09A9.5.2] | WBGene00001520 | 1.75 | 3.36 | 7.65  | 1.9E-04 |
| A_12_P102474 | Y62E10A.13c.1 |                                                        | WBGene00013379 | 1.75 | 3.36 | 6.27  | 5.9E-04 |
| A_12_P114694 | T11B7.2       |                                                        | WBGene00011707 | 1.75 | 3.37 | 9.30  | 6.0E-05 |
| A_12_P117229 | F15E6.2       |                                                        | WBGene00017483 | 1.75 | 3.37 | 5.81  | 9.1E-04 |
| A_12_P105255 | F58G1.3       | Protein phosphatase-1 (PP1) (2 domains) [F58G1.3]      | WBGene00010265 | 1.76 | 3.38 | 8.51  | 1.0E-04 |
| A_12_P114435 | W02A2.5       |                                                        | WBGene00044280 | 1.76 | 3.38 | 6.49  | 4.9E-04 |
| A_12_P104827 | F42A9.3       |                                                        | WBGene00018332 | 1.76 | 3.39 | 8.15  | 1.3E-04 |
| A_12_P102599 | D1054.8       | dehydrogenase [D1054.8]                                | WBGene00008375 | 1.76 | 3.39 | 7.35  | 2.4E-04 |
| A_12_P118679 | F54C4.4       |                                                        | WBGene00018795 | 1.76 | 3.39 | 6.40  | 5.3E-04 |
| A_12_P113306 | C26B9.5.3     | lysosomal Pro-X carboxypeptidase [C26B9.5.3]           | WBGene00016134 | 1.77 | 3.40 | 5.78  | 9.3E-04 |
| A_12_P119774 | ZK1010.7      | collagen [ZK1010.7]                                    | WBGene00000672 | 1.77 | 3.40 | 6.56  | 4.6E-04 |
| A_12_P117289 | W05E7.3       |                                                        | WBGene00001702 | 1.77 | 3.41 | 5.79  | 9.3E-04 |
| A_12_P104259 | C39E9.8a      |                                                        | WBGene00008032 | 1.77 | 3.41 | 7.75  | 1.8E-04 |
| A_12_P106800 | F37B4.2.2     | intermediate filament protein [F37B4.2.2]              | WBGene00002055 | 1.77 | 3.41 | 8.18  | 1.3E-04 |
| A_12_P117555 | R12C12.9b     |                                                        | WBGene00020029 | 1.78 | 3.43 | 6.58  | 4.5E-04 |
| A_12_P110460 | F01D5.8       |                                                        | WBGene00008498 | 1.78 | 3.43 | 7.56  | 2.1E-04 |
| A_12_P111709 | C52D10.6.1    | cyclin A-associated protein [C52D10.6.1]               | WBGene00004818 | 1.78 | 3.43 | 9.98  | 3.9E-05 |
| A_12_P104949 | C09B9.4       | ser/thr protein kinase [C09B9.4]                       | WBGene00015629 | 1.78 | 3.43 | 9.29  | 6.0E-05 |
| A_12_P108174 | ZK1290.12     | warthog gene [ZK1290.12]                               | WBGene00006947 | 1.78 | 3.44 | 9.85  | 4.2E-05 |
| A_12_P118685 | T14D7.3       | vesicle associated membrane protein [T14D7.3]          | WBGene00044062 | 1.78 | 3.44 | 5.75  | 9.6E-04 |
| A_12_P102605 | F54C9.1.1     | initiation factor 5A [F54C9.1.1]                       | WBGene00002065 | 1.78 | 3.44 | 6.46  | 5.1E-04 |
| A_12_P118220 | ZK813.1.1     |                                                        | WBGene00022820 | 1.78 | 3.44 | 9.28  | 6.1E-05 |

Bukhari et al, Supplemental Table 1

|              |             |                                                                        |                 |      |      |       |         |
|--------------|-------------|------------------------------------------------------------------------|-----------------|------|------|-------|---------|
| A_12_P103360 | Y106G6D.6   |                                                                        | WBGene00013702  | 1.78 | 3.44 | 7.55  | 2.1E-04 |
| A_12_P117680 | F13B9.8     |                                                                        | WBGene00001425  | 1.79 | 3.46 | 6.80  | 3.8E-04 |
| A_12_P102010 | F54F11.2    | Zinc-binding metalloprotease [F54F11.2]                                | WBGene00010070  | 1.79 | 3.46 | 7.91  | 1.6E-04 |
| A_12_P111254 | F08B6.4b    |                                                                        | WBGene00006819  | 1.79 | 3.46 | 6.84  | 3.6E-04 |
| A_12_P115127 | M03F4.2a.3  | actin [M03F4.2a.3]                                                     | WBGene00000066  | 1.79 | 3.47 | 7.94  | 1.5E-04 |
| A_12_P117171 | F44G3.10    |                                                                        | WBGene000009710 | 1.80 | 3.48 | 7.56  | 2.0E-04 |
| A_12_P111456 | C01B4.7     |                                                                        | WBGene00021219  | 1.80 | 3.48 | 5.86  | 8.7E-04 |
| A_12_P120355 | K12H6.6b    |                                                                        | WBGene00019686  | 1.81 | 3.50 | 7.14  | 2.9E-04 |
| A_12_P117980 | Y116F11A.6  |                                                                        | WBGene00013819  | 1.81 | 3.50 | 9.22  | 6.3E-05 |
| A_12_P119995 | F11G11.9    |                                                                        | WBGene00017387  | 1.81 | 3.50 | 11.60 | 1.6E-05 |
| A_12_P104393 | C08F1.10    |                                                                        | WBGene00015613  | 1.81 | 3.50 | 10.48 | 2.9E-05 |
| A_12_P101413 | F38C2.5     | Zinc finger C-x8-C-x5-C-x3-H type (and similar). (2 domains) [F38C2.5] | WBGene00009537  | 1.81 | 3.51 | 6.98  | 3.3E-04 |
| A_12_P110046 | Y37D8A.25   |                                                                        | WBGene00012560  | 1.81 | 3.51 | 5.89  | 8.4E-04 |
| A_12_P108163 | M05B5.1     | protein-tyrosine phosphatase [M05B5.1]                                 | WBGene00010869  | 1.82 | 3.52 | 6.09  | 7.0E-04 |
| A_12_P111246 | F58A3.5     | Transthyretin-like family [F58A3.5]                                    | WBGene00010225  | 1.82 | 3.52 | 9.32  | 5.9E-05 |
| A_12_P109092 | C07B5.5     |                                                                        | WBGene00003828  | 1.82 | 3.53 | 7.26  | 2.6E-04 |
| A_12_P117268 | C27B7.9     |                                                                        | WBGene00007765  | 1.82 | 3.53 | 12.54 | 9.7E-06 |
| A_12_P109216 | T01B10.2    |                                                                        | WBGene00001703  | 1.82 | 3.54 | 8.03  | 1.4E-04 |
| A_12_P116271 | F11A3.1.1   | 4-coumarate-CoA ligase [F11A3.1.1]                                     | WBGene00008669  | 1.83 | 3.56 | 6.70  | 4.1E-04 |
| A_12_P105227 | R03G5.1b    | elongation factor EF-1-alpha [R03G5.1a.3]                              | WBGene00001169  | 1.83 | 3.56 | 7.32  | 2.5E-04 |
| A_12_P112264 | B0035.13    | lipase [B0035.13]                                                      | WBGene00007112  | 1.84 | 3.57 | 6.27  | 5.9E-04 |
| A_12_P102877 | ZK770.3.2   |                                                                        | WBGene00002134  | 1.84 | 3.57 | 5.97  | 7.8E-04 |
| A_12_P115459 | F42A10.6    |                                                                        | WBGene00018342  | 1.84 | 3.58 | 6.48  | 4.9E-04 |
| A_12_P108515 | F40E10.3.2  | calsequestrin like [F40E10.3.2]                                        | WBGene00000822  | 1.84 | 3.58 | 6.76  | 3.9E-04 |
| A_12_P109368 | ZK822.2     |                                                                        | WBGene00014090  | 1.84 | 3.58 | 7.06  | 3.0E-04 |
| A_12_P119018 | F23D12.7    |                                                                        | WBGene00009091  | 1.85 | 3.59 | 8.69  | 9.0E-05 |
| A_12_P111702 | T28B8.1.1   |                                                                        | WBGene00012113  | 1.85 | 3.60 | 6.19  | 6.4E-04 |
| A_12_P100341 | C04C3.5     |                                                                        | WBGene00001119  | 1.85 | 3.60 | 6.12  | 6.8E-04 |
| A_12_P120271 | T01B10.1    |                                                                        | WBGene00001693  | 1.85 | 3.60 | 7.82  | 1.7E-04 |
| A_12_P105415 | F19B2.5     |                                                                        | WBGene00008944  | 1.85 | 3.61 | 6.84  | 3.7E-04 |
| A_12_P113418 | ZK622.3a.1  |                                                                        | WBGene00022781  | 1.86 | 3.62 | 6.76  | 3.9E-04 |
| A_12_P105182 | F37H8.5     |                                                                        | WBGene00009514  | 1.86 | 3.63 | 6.92  | 3.4E-04 |
| A_12_P115591 | Y73F8A.12   |                                                                        | WBGene00013521  | 1.86 | 3.63 | 6.13  | 6.8E-04 |
| A_12_P111446 | F37A8.1     |                                                                        | WBGene00009501  | 1.86 | 3.63 | 8.09  | 1.4E-04 |
| A_12_P103370 | F36G9.12    |                                                                        | WBGene00009488  | 1.86 | 3.64 | 10.51 | 2.9E-05 |
| A_12_P112588 | T02E1.6     |                                                                        | WBGene00011378  | 1.87 | 3.66 | 6.11  | 6.9E-04 |
| A_12_P101404 | Y15E3A.4.3  |                                                                        | WBGene00012443  | 1.87 | 3.66 | 7.86  | 1.6E-04 |
| A_12_P105937 | C50E10.1    |                                                                        | WBGene00016825  | 1.87 | 3.66 | 6.52  | 4.8E-04 |
| A_12_P111064 | R07E3.1.3   | cysteine proteinase [R07E3.1.3]                                        | WBGene00011102  | 1.88 | 3.67 | 11.67 | 1.5E-05 |
| A_12_P117204 | C04G6.5     | salt-stress induced peptide [C04G6.5]                                  | WBGene00015455  | 1.88 | 3.67 | 7.66  | 1.9E-04 |
| A_12_P105173 | Y77E11A.2   |                                                                        | WBGene00022307  | 1.88 | 3.67 | 6.67  | 4.2E-04 |
| A_12_P102986 | B0024.1     | collagen [B0024.1]                                                     | WBGene00000722  | 1.89 | 3.70 | 7.71  | 1.8E-04 |
| A_12_P107767 | C45G9.7     |                                                                        | WBGene00016678  | 1.89 | 3.70 | 6.35  | 5.5E-04 |
| A_12_P105032 | F01D4.2     | UDP-glucuronosyltransferase [F01D4.2]                                  | WBGene00008486  | 1.89 | 3.70 | 5.99  | 7.7E-04 |
| A_12_P107697 | C38C3.3     |                                                                        | WBGene00016512  | 1.89 | 3.71 | 7.09  | 3.0E-04 |
| A_12_P107783 | C14A6.1     | Lectin C-type domain short and long forms (2 domains) [C14A6.1]        | WBGene00012251  | 1.89 | 3.72 | 7.12  | 2.9E-04 |
| A_12_P102717 | F56B3.6     |                                                                        | WBGene00018930  | 1.89 | 3.72 | 6.81  | 3.7E-04 |
| A_12_P103928 | F22F1.1.2   | histone h1 [F22F1.1.2]                                                 | WBGene00001854  | 1.90 | 3.74 | 7.69  | 1.9E-04 |
| A_12_P100849 | F32A11.3    |                                                                        | WBGene00009308  | 1.90 | 3.74 | 7.23  | 2.7E-04 |
| A_12_P112711 | Y51H7C.1    |                                                                        | WBGene00021779  | 1.90 | 3.74 | 10.71 | 2.5E-05 |
| A_12_P106282 | Y27F2A.8    |                                                                        | WBGene00021299  | 1.90 | 3.74 | 6.35  | 5.6E-04 |
| A_12_P100753 | F41G3.1.2   |                                                                        | WBGene00018298  | 1.90 | 3.74 | 6.57  | 4.6E-04 |
| A_12_P109874 | Y51A2D.10.4 | Transthyretin-like family [Y51A2D.10.4]                                | WBGene00013078  | 1.91 | 3.75 | 7.97  | 1.5E-04 |
| A_12_P116314 | K09C6.9     |                                                                        | WBGene00019563  | 1.91 | 3.77 | 8.87  | 7.9E-05 |
| A_12_P100598 | C34G6.2     |                                                                        | WBGene00016419  | 1.92 | 3.77 | 7.77  | 1.7E-04 |
| A_12_P104737 | F49C12.14   |                                                                        | WBGene00009882  | 1.92 | 3.79 | 8.01  | 1.5E-04 |
| A_12_P116588 | F15A4.6     | Toxocara surface glycoprotein like [F15A4.6]                           | WBGene00008841  | 1.92 | 3.79 | 5.80  | 9.2E-04 |
| A_12_P114505 | F49F1.6     |                                                                        | WBGene00018646  | 1.92 | 3.79 | 11.74 | 1.5E-05 |
| A_12_P115597 | Y39G8B.9    |                                                                        | WBGene00012728  | 1.93 | 3.80 | 10.42 | 3.0E-05 |
| A_12_P101487 | C37A5.1     | Putative membrane protein [C37A5.1]                                    | WBGene00007988  | 1.93 | 3.81 | 10.60 | 2.7E-05 |
| A_12_P101973 | D2062.1     |                                                                        | WBGene00017055  | 1.93 | 3.82 | 7.86  | 1.6E-04 |
| A_12_P119577 | C49D10.11   |                                                                        | WBGene00016779  | 1.93 | 3.82 | 6.83  | 3.7E-04 |
| A_12_P111389 | F15A4.10    |                                                                        | WBGene00008844  | 1.94 | 3.82 | 5.99  | 7.7E-04 |
| A_12_P112671 | D2007.1     |                                                                        | WBGene00017041  | 1.94 | 3.83 | 9.67  | 4.7E-05 |
| A_12_P117322 | F53F4.13    |                                                                        | WBGene00009995  | 1.94 | 3.83 | 8.38  | 1.1E-04 |

Bukhari et al, Supplemental Table 1

|              |              |                                                                         |                |      |      |       |         |
|--------------|--------------|-------------------------------------------------------------------------|----------------|------|------|-------|---------|
| A_12_P116334 | F32H5.3b     |                                                                         | WBGene00009349 | 1.94 | 3.84 | 5.73  | 9.8E-04 |
| A_12_P107395 | W04C9.1      | ABC transporter [W04C9.1]                                               | WBGene00001814 | 1.94 | 3.84 | 6.01  | 7.5E-04 |
| A_12_P107773 | F09F9.2      |                                                                         | WBGene00017307 | 1.94 | 3.84 | 7.96  | 1.5E-04 |
| A_12_P112263 | C05E4.9a.2   | isocitrate lyase [C05E4.9a.2]                                           | WBGene00001564 | 1.94 | 3.84 | 7.91  | 1.6E-04 |
| A_12_P114410 | F49E12.2     |                                                                         | WBGene00009898 | 1.94 | 3.85 | 6.36  | 5.5E-04 |
| A_12_P108357 | B0218.8      |                                                                         | WBGene00015052 | 1.94 | 3.85 | 6.48  | 4.9E-04 |
| A_12_P102966 | F52E1.7b     | heat shock protein [F52E1.7a]                                           | WBGene00002021 | 1.94 | 3.85 | 7.68  | 1.9E-04 |
| A_12_P108215 | Y71A12B.11   |                                                                         | WBGene00013508 | 1.95 | 3.85 | 9.68  | 4.7E-05 |
| A_12_P113190 | T26C5.1      | glutathione S-transferase [T26C5.1]                                     | WBGene00001761 | 1.95 | 3.85 | 8.17  | 1.3E-04 |
| A_12_P110281 | F11G11.3     | glutathione S-transferase [F11G11.3]                                    | WBGene00001754 | 1.95 | 3.87 | 12.33 | 1.1E-05 |
| A_12_P107170 | C43H6.3      |                                                                         | WBGene00016616 | 1.95 | 3.87 | 5.97  | 7.8E-04 |
| A_12_P112794 | F43C11.3     |                                                                         | WBGene00018380 | 1.96 | 3.89 | 5.97  | 7.9E-04 |
| A_12_P115509 | C44C1.5a     |                                                                         | WBGene00016644 | 1.96 | 3.89 | 7.38  | 2.4E-04 |
| A_12_P113727 | Y76A2A.1     |                                                                         | WBGene00006509 | 1.96 | 3.89 | 6.40  | 5.3E-04 |
| A_12_P107413 | F22B8.6      | cystathione gamma-lyase like [F22B8.6]                                  | WBGene00009048 | 1.96 | 3.89 | 7.64  | 1.9E-04 |
| A_12_P111383 | F13E9.8      |                                                                         | WBGene00045209 | 1.96 | 3.90 | 7.98  | 1.5E-04 |
| A_12_P105101 | C05C12.5     |                                                                         | WBGene00007337 | 1.97 | 3.91 | 6.17  | 6.5E-04 |
| A_12_P109365 | F53A9.9      |                                                                         | WBGene00018732 | 1.97 | 3.91 | 12.94 | 8.0E-06 |
| A_12_P106639 | E03A3.4      | histone H3 [E03A3.4]                                                    | WBGene00001944 | 1.97 | 3.92 | 12.10 | 1.2E-05 |
| A_12_P106461 | F36F12.7     |                                                                         | WBGene00018098 | 1.97 | 3.93 | 10.58 | 2.7E-05 |
| A_12_P111472 | C06G8.1      |                                                                         | WBGene00007384 | 1.97 | 3.93 | 10.30 | 3.2E-05 |
| A_12_P100116 | B0244.9      |                                                                         | WBGene00015084 | 1.98 | 3.93 | 7.18  | 2.8E-04 |
| A_12_P103189 | K03E6.6      | Profilin [K03E6.6]                                                      | WBGene00003991 | 1.98 | 3.93 | 7.94  | 1.5E-04 |
| A_12_P112740 | C09H5.2b     |                                                                         | WBGene00015660 | 1.98 | 3.93 | 11.22 | 1.9E-05 |
| A_12_P105445 | Y47D3B.2a    |                                                                         | WBGene00003759 | 1.98 | 3.94 | 7.14  | 2.8E-04 |
| A_12_P103799 | W02A2.1.2    | Fatty acid desaturase [W02A2.1.2]                                       | WBGene00001394 | 1.98 | 3.96 | 6.34  | 5.6E-04 |
| A_12_P101010 | R11D1.11     | Mouse adipocyte P27 protein like [R11D1.11]                             | WBGene00000984 | 1.99 | 3.96 | 5.97  | 7.8E-04 |
| A_12_P113882 | Y49E10.16    |                                                                         | WBGene00013035 | 1.99 | 3.97 | 7.81  | 1.7E-04 |
| A_12_P100240 | F15B10.3     |                                                                         | WBGene00017481 | 1.99 | 3.97 | 6.08  | 7.1E-04 |
| A_12_P114428 | Y71G12B.3    |                                                                         | WBGene00022143 | 1.99 | 3.97 | 7.47  | 2.2E-04 |
| A_12_P112862 | Y43C5A.2     | Fibrinogen beta and gamma chains, C-terminal globular domain [Y43C5A.2] | WBGene00012782 | 2.00 | 4.00 | 5.83  | 8.9E-04 |
| A_12_P107073 | C54F6.6      |                                                                         | WBGene00016924 | 2.00 | 4.01 | 11.60 | 1.6E-05 |
| A_12_P108639 | A_12_P108639 |                                                                         | WBGene00010133 | 2.00 | 4.01 | 9.81  | 4.3E-05 |
| A_12_P107871 | A_12_P107871 |                                                                         | WBGene00021050 | 2.01 | 4.03 | 9.99  | 3.9E-05 |
| A_12_P116496 | T28D6.2      | tubulin alpha subunit [T28D6.2]                                         | WBGene00006533 | 2.01 | 4.04 | 10.22 | 3.4E-05 |
| A_12_P113337 | R06F6.11     |                                                                         | WBGene00011072 | 2.01 | 4.04 | 5.98  | 7.8E-04 |
| A_12_P109902 | F53A9.10b.5  |                                                                         | WBGene00006587 | 2.02 | 4.05 | 6.53  | 4.7E-04 |
| A_12_P104392 | B0222.6      |                                                                         | WBGene00000717 | 2.02 | 4.05 | 7.80  | 1.7E-04 |
| A_12_P113444 | F56F10.1.1   | peptidase [F56F10.1.1]                                                  | WBGene00018984 | 2.03 | 4.07 | 7.33  | 2.5E-04 |
| A_12_P106107 | K10B3.9.1    |                                                                         | WBGene00001684 | 2.03 | 4.07 | 7.33  | 2.4E-04 |
| A_12_P116927 | Y47G6A.26    |                                                                         | WBGene00021650 | 2.03 | 4.08 | 8.07  | 1.4E-04 |
| A_12_P108079 | R13A5.6      |                                                                         | WBGene00020049 | 2.03 | 4.09 | 9.48  | 5.3E-05 |
| A_12_P112445 | M04C9.4      |                                                                         | WBGene00010859 | 2.04 | 4.11 | 9.33  | 5.9E-05 |
| A_12_P117235 | Y110A2AL.4b  |                                                                         | WBGene00022441 | 2.04 | 4.11 | 7.08  | 3.0E-04 |
| A_12_P115859 | W05G11.6b.2  | phosphoenolpyruvate carboxykinase [W05G11.6a]                           | WBGene00021043 | 2.04 | 4.11 | 6.34  | 5.6E-04 |
| A_12_P117774 | C29E4.1      | Cuticle collagen [C29E4.1]                                              | WBGene00000665 | 2.04 | 4.11 | 7.91  | 1.6E-04 |
| A_12_P102907 | W05H7.3      |                                                                         | WBGene00021046 | 2.04 | 4.12 | 5.99  | 7.7E-04 |
| A_12_P112300 | C14F11.6     | DTDP-4-dehydrorhamnose 3,5-epimerase (RFB gene) [C14F11.6]              | WBGene00015781 | 2.05 | 4.14 | 6.78  | 3.8E-04 |
| A_12_P119733 | K08D10.8.2   |                                                                         | WBGene00019531 | 2.05 | 4.14 | 10.87 | 2.3E-05 |
| A_12_P110932 | C14C10.1     | mitochondrial carrier protein [C14C10.1]                                | WBGene00007584 | 2.05 | 4.15 | 7.37  | 2.4E-04 |
| A_12_P113415 | C34E7.4      |                                                                         | WBGene00007934 | 2.06 | 4.18 | 10.40 | 3.0E-05 |
| A_12_P101332 | F19F10.3     |                                                                         | WBGene00017599 | 2.07 | 4.20 | 8.93  | 7.7E-05 |
| A_12_P115719 | C52E4.1.1    | cathepsin-like cysteine protease [C52E4.1.1]                            | WBGene00000781 | 2.07 | 4.20 | 8.21  | 1.3E-04 |
| A_12_P104236 | K03H6.2      |                                                                         | WBGene00019368 | 2.07 | 4.20 | 7.59  | 2.0E-04 |
| A_12_P101172 | B0432.12     |                                                                         | WBGene00015193 | 2.07 | 4.20 | 9.92  | 4.1E-05 |
| A_12_P119776 | F22E5.20     |                                                                         | WBGene00017713 | 2.08 | 4.23 | 8.27  | 1.2E-04 |
| A_12_P106656 | C44C10.1     | collagen [C44C10.1]                                                     | WBGene00000753 | 2.08 | 4.24 | 9.53  | 5.2E-05 |
| A_12_P109138 | M02F4.7.2    |                                                                         | WBGene00019738 | 2.08 | 4.24 | 11.08 | 2.1E-05 |
| A_12_P114214 | F48E8.1b.3   |                                                                         | WBGene00003055 | 2.09 | 4.26 | 5.84  | 8.9E-04 |
| A_12_P116908 | Y50D7A.7.2   |                                                                         | WBGene00000081 | 2.09 | 4.26 | 6.93  | 3.4E-04 |
| A_12_P112131 | F42F12.4.1   |                                                                         | WBGene00009636 | 2.09 | 4.27 | 6.51  | 4.8E-04 |
| A_12_P118350 | Y45F10C.4    |                                                                         | WBGene00012880 | 2.10 | 4.28 | 9.24  | 6.2E-05 |
| A_12_P106180 | F32B6.4      |                                                                         | WBGene00009321 | 2.10 | 4.28 | 7.56  | 2.0E-04 |
| A_12_P107758 | W03D8.3      |                                                                         | WBGene00020986 | 2.10 | 4.29 | 8.50  | 1.0E-04 |
| A_12_P108868 | M04G12.2     | cysteine protease [M04G12.2]                                            | WBGene00000789 | 2.10 | 4.29 | 6.91  | 3.4E-04 |

Bukhari et al, Supplemental Table 1

|              |              |                                                                                           |                |      |      |       |         |
|--------------|--------------|-------------------------------------------------------------------------------------------|----------------|------|------|-------|---------|
| A_12_P119422 | K01D12.11    | glutathione S-transferase [K01D12.11]                                                     | WBGene00010470 | 2.11 | 4.31 | 10.52 | 2.8E-05 |
| A_12_P105705 | C03C11.2     |                                                                                           | WBGene00001483 | 2.11 | 4.32 | 13.05 | 7.6E-06 |
| A_12_P104713 | C44F1.3      | galactoside binding lectin [C44F1.3]                                                      | WBGene00002267 | 2.11 | 4.32 | 5.93  | 8.2E-04 |
| A_12_P118345 | Y54F10AM.8.5 |                                                                                           | WBGene00021852 | 2.11 | 4.33 | 10.00 | 3.9E-05 |
| A_12_P105484 | K01D12.7     |                                                                                           | WBGene00010466 | 2.11 | 4.33 | 6.24  | 6.1E-04 |
| A_12_P103959 | F55G11.5     |                                                                                           | WBGene00010125 | 2.12 | 4.34 | 11.28 | 1.9E-05 |
| A_12_P101591 | F01D5.5      |                                                                                           | WBGene00008495 | 2.12 | 4.34 | 13.45 | 6.3E-06 |
| A_12_P116373 | ZC395.5      |                                                                                           | WBGene00022597 | 2.12 | 4.35 | 6.60  | 4.5E-04 |
| A_12_P111697 | B0218.7      |                                                                                           | WBGene00015051 | 2.12 | 4.35 | 6.95  | 3.3E-04 |
| A_12_P109797 | C31C9.2.5    | D-3-Phosphoglycerate dehydrogenase [C31C9.2.5]                                            | WBGene00007836 | 2.13 | 4.38 | 5.78  | 9.3E-04 |
| A_12_P102098 | C42D8.1      |                                                                                           | WBGene00016599 | 2.14 | 4.41 | 7.74  | 1.8E-04 |
| A_12_P102781 | C35D10.14    | C-type lectin domain [C35D10.14]                                                          | WBGene00016450 | 2.14 | 4.41 | 7.79  | 1.7E-04 |
| A_12_P109110 | F35C8.6      |                                                                                           | WBGene00003990 | 2.14 | 4.42 | 6.91  | 3.4E-04 |
| A_12_P118735 | Y47D3A.13    |                                                                                           | WBGene00012926 | 2.15 | 4.43 | 7.45  | 2.2E-04 |
| A_12_P119983 | F23H12.4.2   | collagen [F23H12.4.2]                                                                     | WBGene00005018 | 2.15 | 4.45 | 5.98  | 7.7E-04 |
| A_12_P111706 | C01B10.6a    |                                                                                           | WBGene00015280 | 2.15 | 4.45 | 7.18  | 2.8E-04 |
| A_12_P113619 | W02G9.4      |                                                                                           | WBGene00020954 | 2.15 | 4.45 | 6.26  | 6.0E-04 |
| A_12_P110065 | T07C4.5.3    | Transthyretin-like family [T07C4.5.3]                                                     | WBGene00011561 | 2.15 | 4.45 | 9.41  | 5.6E-05 |
| A_12_P105927 | C46C2.5      |                                                                                           | WBGene00008113 | 2.16 | 4.45 | 7.38  | 2.3E-04 |
| A_12_P111216 | Y14H12A.1    |                                                                                           | WBGene00021190 | 2.16 | 4.46 | 6.87  | 3.6E-04 |
| A_12_P115751 | F21F8.7.2    | protease [F21F8.7.2]                                                                      | WBGene00000219 | 2.16 | 4.47 | 6.99  | 3.2E-04 |
| A_12_P106542 | ZC513.12     |                                                                                           | WBGene00006060 | 2.17 | 4.49 | 8.69  | 9.0E-05 |
| A_12_P111660 | Y47D7A.5     |                                                                                           | WBGene00001714 | 2.18 | 4.52 | 5.78  | 8.5E-04 |
| A_12_P113258 | M163.3       | histone H1 [M163.3]                                                                       | WBGene00001898 | 2.18 | 4.52 | 8.70  | 8.9E-05 |
| A_12_P102493 | C10B5.3      |                                                                                           | WBGene00015671 | 2.18 | 4.54 | 12.63 | 9.3E-06 |
| A_12_P118423 | F56G4.2      |                                                                                           | WBGene00010158 | 2.18 | 4.54 | 10.81 | 2.4E-05 |
| A_12_P119100 | F35C5.5a     | Lectin C-type domain short and long forms, von Willebrand factor type A domain [F35C5.5a] | WBGene00009393 | 2.18 | 4.54 | 10.87 | 2.3E-05 |
| A_12_P106326 | F26D10.12    | Lectin C-type domain [F26D10.12]                                                          | WBGene00009156 | 2.18 | 4.55 | 10.39 | 3.1E-05 |
| A_12_P103205 | K07A1.4      |                                                                                           | WBGene00010611 | 2.18 | 4.55 | 8.42  | 1.1E-04 |
| A_12_P105922 | C16C8.18     |                                                                                           | WBGene00015855 | 2.19 | 4.56 | 9.27  | 6.1E-05 |
| A_12_P107630 | K01D12.15    |                                                                                           | WBGene00010474 | 2.19 | 4.56 | 6.48  | 5.0E-04 |
| A_12_P115901 | Y37D8A.16    |                                                                                           | WBGene00012554 | 2.19 | 4.56 | 11.33 | 1.8E-05 |
| A_12_P117660 | F15B9.8.1    | Thrombospondin type 1 domain [F15B9.8.1]                                                  | WBGene00008851 | 2.19 | 4.57 | 8.05  | 1.4E-04 |
| A_12_P113156 | F53H2.2      |                                                                                           | WBGene00010005 | 2.20 | 4.58 | 12.83 | 8.4E-06 |
| A_12_P113588 | K09E10.1     |                                                                                           | WBGene00019579 | 2.20 | 4.59 | 12.48 | 1.0E-05 |
| A_12_P102708 | K03H1.3      | Transthyretin-like family [K03H1.3]                                                       | WBGene00010538 | 2.20 | 4.60 | 9.98  | 3.9E-05 |
| A_12_P110830 | T18H9.2a.1   | protease [T18H9.2a.1]                                                                     | WBGene00000215 | 2.20 | 4.61 | 5.89  | 8.4E-04 |
| A_12_P110074 | F55H12.4.2   |                                                                                           | WBGene00010135 | 2.20 | 4.61 | 8.03  | 1.4E-04 |
| A_12_P108675 | M04D8.3      |                                                                                           | WBGene00002106 | 2.21 | 4.61 | 6.67  | 4.2E-04 |
| A_12_P107975 | F36D1.4      |                                                                                           | WBGene00009463 | 2.21 | 4.63 | 7.56  | 2.0E-04 |
| A_12_P110857 | F57H12.6     |                                                                                           | WBGene00019021 | 2.22 | 4.64 | 13.07 | 7.5E-06 |
| A_12_P114456 | F58F6.2      | cuticular collagen [F58F6.2]                                                              | WBGene00000679 | 2.22 | 4.65 | 8.76  | 8.6E-05 |
| A_12_P101358 | K08D10.7     |                                                                                           | WBGene00019530 | 2.22 | 4.65 | 9.92  | 4.1E-05 |
| A_12_P104474 | H12I13.6     |                                                                                           | WBGene00019193 | 2.24 | 4.71 | 7.74  | 1.8E-04 |
| A_12_P118158 | R09B5.6.2    | 3-hydroxyacyl-CoA dehydrogenase [R09B5.6.2]                                               | WBGene00019978 | 2.24 | 4.71 | 8.55  | 9.9E-05 |
| A_12_P102792 | F46H5.3b.1   |                                                                                           | WBGene00018519 | 2.24 | 4.72 | 6.58  | 4.5E-04 |
| A_12_P100418 | Y43F8C.13    | Inosine-uridine preferring nucleoside hydrolase [Y43F8C.13]                               | WBGene00003413 | 2.24 | 4.72 | 6.82  | 3.7E-04 |
| A_12_P103340 | T08A9.8      |                                                                                           | WBGene00004989 | 2.24 | 4.73 | 5.87  | 8.6E-04 |
| A_12_P111553 | R12H7.2      | aspartyl protease [R12H7.2]                                                               | WBGene00000217 | 2.24 | 4.74 | 7.71  | 1.8E-04 |
| A_12_P103427 | C53B7.2      |                                                                                           | WBGene00016893 | 2.25 | 4.74 | 6.85  | 3.6E-04 |
| A_12_P117115 | C32H11.3     |                                                                                           | WBGene00007866 | 2.25 | 4.75 | 11.95 | 1.3E-05 |
| A_12_P101650 | C44B11.6.2   |                                                                                           | WBGene00016635 | 2.25 | 4.75 | 5.76  | 9.6E-04 |
| A_12_P115021 | C05E11.8     |                                                                                           | WBGene00001455 | 2.25 | 4.76 | 14.53 | 3.9E-06 |
| A_12_P113286 | F32D8.9      |                                                                                           | WBGene00005001 | 2.26 | 4.78 | 7.87  | 1.6E-04 |
| A_12_P105459 | M60.2.3      |                                                                                           | WBGene00019779 | 2.26 | 4.79 | 7.22  | 2.7E-04 |
| A_12_P108638 | F56D6.1      |                                                                                           | WBGene00044642 | 2.26 | 4.79 | 9.05  | 7.1E-05 |
| A_12_P103484 | C08F11.7     |                                                                                           | WBGene00007454 | 2.26 | 4.79 | 7.73  | 1.8E-04 |
| A_12_P116608 | C24A11.1     |                                                                                           | WBGene00016040 | 2.26 | 4.80 | 8.96  | 7.5E-05 |
| A_12_P112703 | T27E7.1      |                                                                                           | WBGene00012087 | 2.26 | 4.80 | 7.66  | 1.9E-04 |
| A_12_P108355 | T25F10.6b.1  | calponin-like protein [T25F10.6a.2]                                                       | WBGene00020808 | 2.27 | 4.82 | 6.94  | 3.3E-04 |
| A_12_P111060 | W09G12.4     |                                                                                           | WBGene00001103 | 2.27 | 4.83 | 14.09 | 4.7E-06 |
| A_12_P104746 | F42G9.2      |                                                                                           | WBGene00000882 | 2.27 | 4.83 | 5.78  | 9.4E-04 |
| A_12_P101708 | Y39G8B.1b    |                                                                                           | WBGene00012722 | 2.27 | 4.83 | 7.14  | 2.8E-04 |
| A_12_P109413 | Y37D8A.5     |                                                                                           | WBGene00012547 | 2.27 | 4.84 | 9.12  | 6.7E-05 |
| A_12_P105361 | Y79H2A.1.3   |                                                                                           | WBGene00000273 | 2.28 | 4.84 | 10.08 | 3.7E-05 |



Bukhari et al, Supplemental Table 1

|              |              |                                                                        |                |      |      |       |         |
|--------------|--------------|------------------------------------------------------------------------|----------------|------|------|-------|---------|
| A_12_P115281 | F41H10.8.1   |                                                                        | WBGene00001244 | 2.28 | 4.85 | 8.63  | 9.4E-05 |
| A_12_P114346 | K09E4.6      |                                                                        | WBGene00010723 | 2.28 | 4.86 | 8.80  | 8.3E-05 |
| A_12_P113277 | K09E4.1      |                                                                        | WBGene00010719 | 2.29 | 4.87 | 6.19  | 6.4E-04 |
| A_12_P100548 | F22H10.2     |                                                                        | WBGene00017726 | 2.29 | 4.89 | 11.01 | 2.2E-05 |
| A_12_P108821 | C49G7.10     |                                                                        | WBGene00016788 | 2.29 | 4.90 | 6.32  | 5.7E-04 |
| A_12_P108364 | K12H4.7a     |                                                                        | WBGene00019682 | 2.29 | 4.90 | 6.45  | 5.1E-04 |
| A_12_P120244 | F54E2.1      |                                                                        | WBGene00018823 | 2.30 | 4.91 | 8.41  | 1.1E-04 |
| A_12_P100863 | F53E10.4     |                                                                        | WBGene00018760 | 2.30 | 4.91 | 6.77  | 3.9E-04 |
| A_12_P105670 | F20D1.10.2   |                                                                        | WBGene00008980 | 2.30 | 4.92 | 9.25  | 6.2E-05 |
| A_12_P107591 | F09G8.6      | Cuticle collagen [F09G8.6]                                             | WBGene00000666 | 2.30 | 4.93 | 8.75  | 8.6E-05 |
| A_12_P109508 | Y54G2A.6     |                                                                        | WBGene00021872 | 2.30 | 4.93 | 6.04  | 7.4E-04 |
| A_12_P112581 | F13A7.1      |                                                                        | WBGene00008724 | 2.30 | 4.94 | 8.83  | 8.2E-05 |
| A_12_P118360 | Y53F4B.33    | glutathione S-transferase [Y53F4B.33]                                  | WBGene00001787 | 2.31 | 4.95 | 6.56  | 4.6E-04 |
| A_12_P100312 | C28C12.5.2   |                                                                        | WBGene00004993 | 2.31 | 4.96 | 7.63  | 1.9E-04 |
| A_12_P113607 | Y73F8A.14    |                                                                        | WBGene00013523 | 2.31 | 4.96 | 6.48  | 4.9E-04 |
| A_12_P107571 | C15H9.7.2    | kynureninase [C15H9.7.2]                                               | WBGene00015802 | 2.32 | 4.99 | 6.21  | 6.3E-04 |
| A_12_P108880 | T10E10.6     | collagen [T10E10.6]                                                    | WBGene00000741 | 2.32 | 5.00 | 11.34 | 1.8E-05 |
| A_12_P110530 | Y51A2D.9.2   | Transthyretin-like family [Y51A2D.9.2]                                 | WBGene00013077 | 2.32 | 5.00 | 7.92  | 1.6E-04 |
| A_12_P101502 | Y47D7A.13.1  |                                                                        | WBGene00021625 | 2.32 | 5.01 | 8.93  | 7.6E-05 |
| A_12_P118766 | C52D10.7     | cyclin A-associated protein [C52D10.7]                                 | WBGene00004815 | 2.32 | 5.01 | 10.84 | 2.4E-05 |
| A_12_P110997 | F40F8.3      |                                                                        | WBGene00044917 | 2.33 | 5.01 | 6.65  | 4.3E-04 |
| A_12_P114943 | ZK970.7      | OV-17 antigen precursor [ZK970.7]                                      | WBGene00014173 | 2.33 | 5.04 | 10.36 | 3.1E-05 |
| A_12_P110027 | VW02B12L.1.5 | vacuolar ATP synthase [VW02B12L.1.5]                                   | WBGene00006915 | 2.34 | 5.05 | 7.11  | 2.9E-04 |
| A_12_P118630 | C54E4.2b     |                                                                        | WBGene00016918 | 2.34 | 5.06 | 5.74  | 9.7E-04 |
| A_12_P106356 | K06G5.1.2    |                                                                        | WBGene00010605 | 2.34 | 5.06 | 7.90  | 1.6E-04 |
| A_12_P118202 | ZK512.10     |                                                                        | WBGene00013988 | 2.34 | 5.07 | 8.31  | 1.2E-04 |
| A_12_P115384 | D1025.7      |                                                                        | WBGene00008358 | 2.34 | 5.08 | 6.83  | 3.7E-04 |
| A_12_P104750 | T05H10.3     |                                                                        | WBGene00011508 | 2.34 | 5.08 | 6.55  | 4.7E-04 |
| A_12_P104023 | T08A9.11     |                                                                        | WBGene00020339 | 2.35 | 5.09 | 7.64  | 1.9E-04 |
| A_12_P117297 | Y53H1B.2     |                                                                        | WBGene00013181 | 2.35 | 5.11 | 14.48 | 4.0E-06 |
| A_12_P102918 | C36E6.3      |                                                                        | WBGene00003369 | 2.36 | 5.13 | 6.55  | 4.7E-04 |
| A_12_P115207 | E04F6.8      |                                                                        | WBGene00017127 | 2.37 | 5.15 | 14.42 | 4.1E-06 |
| A_12_P109033 | F44F4.11.1   | tubulin alpha-2 chain [F44F4.11.1]                                     | WBGene00006530 | 2.37 | 5.17 | 6.31  | 5.7E-04 |
| A_12_P118274 | C25B8.4b     | asialoglycoprotein receptor [C25B8.4a]                                 | WBGene00016088 | 2.38 | 5.20 | 15.55 | 2.5E-06 |
| A_12_P104620 | Y106G6A.4    |                                                                        | WBGene00013696 | 2.38 | 5.21 | 5.79  | 9.2E-04 |
| A_12_P103408 | Y38F1A.1     |                                                                        | WBGene00012605 | 2.38 | 5.22 | 8.24  | 1.2E-04 |
| A_12_P113702 | Y60A3A.21    |                                                                        | WBGene00013366 | 2.38 | 5.22 | 7.57  | 2.0E-04 |
| A_12_P114311 | F38A1.5      | phospholipase A2 receptor [F38A1.5]                                    | WBGene00009518 | 2.39 | 5.23 | 8.41  | 1.1E-04 |
| A_12_P100639 | Y41D4B.16    |                                                                        | WBGene00021518 | 2.39 | 5.23 | 8.47  | 1.0E-04 |
| A_12_P112801 | F40H6.1      |                                                                        | WBGene00018253 | 2.39 | 5.23 | 7.52  | 2.1E-04 |
| A_12_P110757 | W09G12.1     |                                                                        | WBGene00001104 | 2.39 | 5.24 | 10.10 | 3.6E-05 |
| A_12_P115414 | T27A3.3      |                                                                        | WBGene00006044 | 2.39 | 5.24 | 10.05 | 3.8E-05 |
| A_12_P103047 | Y48A6B.7     | Cytidine and deoxycytidylate deaminases zinc-binding region [Y48A6B.7] | WBGene00012968 | 2.39 | 5.24 | 6.10  | 6.9E-04 |
| A_12_P109943 | W02D3.5.1    | fatty acid-binding protein [W02D3.5.1]                                 | WBGene00002258 | 2.39 | 5.24 | 6.87  | 3.6E-04 |
| A_12_P115250 | R03D7.6      | glutathione S-transferase [R03D7.6]                                    | WBGene00001753 | 2.39 | 5.24 | 6.14  | 6.7E-04 |
| A_12_P117943 | K09E10.2     |                                                                        | WBGene00019580 | 2.39 | 5.26 | 12.91 | 8.1E-06 |
| A_12_P102822 | F36A4.6      | cuticular collagen [F36A4.6]                                           | WBGene00000610 | 2.39 | 5.26 | 7.39  | 2.3E-04 |
| A_12_P103550 | C08F1.6      |                                                                        | WBGene00015610 | 2.40 | 5.26 | 16.57 | 1.7E-06 |
| A_12_P119160 | F54D8.1.1    |                                                                        | WBGene00001076 | 2.40 | 5.28 | 7.99  | 1.5E-04 |
| A_12_P102198 | K03H1.12     |                                                                        | WBGene00010547 | 2.40 | 5.28 | 7.56  | 2.0E-04 |
| A_12_P100742 | F47G4.3      | NAD-dependent glycerol-3-phosphate dehydrogenase [F47G4.3]             | WBGene00009824 | 2.40 | 5.28 | 7.19  | 2.7E-04 |
| A_12_P111368 | T10B5.7      | lipase [T10B5.7]                                                       | WBGene00020393 | 2.41 | 5.33 | 8.56  | 9.9E-05 |
| A_12_P105690 | ZK892.2      | lipid transfer protein [ZK892.2]                                       | WBGene00003773 | 2.41 | 5.33 | 7.94  | 1.5E-04 |
| A_12_P103185 | F55D12.6     |                                                                        | WBGene00010114 | 2.42 | 5.34 | 6.95  | 3.3E-04 |
| A_12_P116856 | C16H3.2      | sugar-binding protein [C16H3.2]                                        | WBGene00002272 | 2.42 | 5.35 | 7.68  | 1.9E-04 |
| A_12_P112950 | B0261.6      |                                                                        | WBGene00015094 | 2.43 | 5.37 | 6.40  | 5.3E-04 |
| A_12_P117945 | C38C10.6     |                                                                        | WBGene00008002 | 2.43 | 5.38 | 13.93 | 5.0E-06 |
| A_12_P112961 | T05A6.1.2    |                                                                        | WBGene00000516 | 2.43 | 5.38 | 7.38  | 2.3E-04 |
| A_12_P112947 | F07C4.7      |                                                                        | WBGene00017201 | 2.43 | 5.38 | 7.22  | 2.7E-04 |
| A_12_P105752 | Y105E8B.1e.3 |                                                                        | WBGene00002978 | 2.43 | 5.38 | 6.99  | 3.2E-04 |
| A_12_P111689 | C52G5.2      |                                                                        | WBGene00008260 | 2.43 | 5.38 | 6.78  | 3.8E-04 |
| A_12_P104075 | T04F8.8      |                                                                        | WBGene00011446 | 2.43 | 5.40 | 7.19  | 2.7E-04 |
| A_12_P100183 | F19C7.7      | cuticular collagen [F19C7.7]                                           | WBGene00000684 | 2.43 | 5.40 | 6.07  | 7.1E-04 |
| A_12_P101702 | ZC477.7      |                                                                        | WBGene00022621 | 2.43 | 5.41 | 6.36  | 5.5E-04 |
| A_12_P112439 | K08B4.6      | protease inhibitor [K08B4.6]                                           | WBGene00000535 | 2.44 | 5.41 | 12.36 | 1.1E-05 |

Bukhari et al, Supplemental Table 1

|              |              |                                                   |                |      |      |       |         |
|--------------|--------------|---------------------------------------------------|----------------|------|------|-------|---------|
| A_12_P108767 | F31F6.4b     |                                                   | WBGene00001451 | 2.44 | 5.42 | 8.25  | 1.2E-04 |
| A_12_P118184 | F58E6.1a     | SH2 domain [F58E6.1a]                             | WBGene00077697 | 2.44 | 5.42 | 7.21  | 2.7E-04 |
| A_12_P108387 | F49D11.8     |                                                   | WBGene00000780 | 2.44 | 5.43 | 8.53  | 1.0E-04 |
| A_12_P111777 | F58G1.4      |                                                   | WBGene00010266 | 2.45 | 5.46 | 8.28  | 1.2E-04 |
| A_12_P108592 | F09F7.2a     |                                                   | WBGene00003371 | 2.45 | 5.48 | 7.09  | 3.0E-04 |
| A_12_P110650 | T21D12.2     | cuticular collagen [T21D12.2]                     | WBGene00001071 | 2.45 | 5.48 | 5.95  | 8.0E-04 |
| A_12_P114320 | Y66H1A.5     |                                                   | WBGene00022047 | 2.46 | 5.49 | 7.98  | 1.5E-04 |
| A_12_P118406 | B0222.3.1    | phosphate permease [B0222.3.1]                    | WBGene00015055 | 2.46 | 5.50 | 11.98 | 1.3E-05 |
| A_12_P120001 | T04C12.3.1   |                                                   | WBGene00011428 | 2.46 | 5.51 | 11.12 | 2.0E-05 |
| A_12_P116279 | C14A4.9      |                                                   | WBGene00007560 | 2.47 | 5.53 | 11.19 | 2.0E-05 |
| A_12_P100293 | Y37D8A.15.1  |                                                   | WBGene00001457 | 2.47 | 5.54 | 7.27  | 2.6E-04 |
| A_12_P119968 | K02B7.3      |                                                   | WBGene00010491 | 2.47 | 5.55 | 6.64  | 4.3E-04 |
| A_12_P101880 | Y37E11B.10b  |                                                   | WBGene00021381 | 2.48 | 5.58 | 8.09  | 1.4E-04 |
| A_12_P102266 | JC8.8.1      | Transthyretin-like family [JC8.8.1]               | WBGene00010440 | 2.48 | 5.59 | 10.14 | 3.6E-05 |
| A_12_P107929 | ZK1320.3.2   |                                                   | WBGene00014253 | 2.49 | 5.61 | 8.14  | 1.3E-04 |
| A_12_P109707 | F47B10.7.1   | acyl-CoA-binding protein [F47B10.7.1]             | WBGene00009818 | 2.49 | 5.62 | 11.12 | 2.0E-05 |
| A_12_P117630 | C55C3.3      |                                                   | WBGene00016953 | 2.49 | 5.63 | 9.45  | 5.5E-05 |
| A_12_P100980 | C36E6.5.3    |                                                   | WBGene00003370 | 2.49 | 5.63 | 5.72  | 9.9E-04 |
| A_12_P105793 | R01B10.3     |                                                   | WBGene00019805 | 2.49 | 5.63 | 7.13  | 2.9E-04 |
| A_12_P105975 | W07B8.5      | thiol protease [W07B8.5]                          | WBGene00000785 | 2.50 | 5.65 | 6.63  | 4.3E-04 |
| A_12_P118319 | F57C2.4      |                                                   | WBGene00010196 | 2.50 | 5.67 | 8.45  | 1.1E-04 |
| A_12_P111206 | T04C9.4a.1   |                                                   | WBGene00003375 | 2.50 | 5.68 | 7.26  | 2.6E-04 |
| A_12_P102053 | B0454.5      |                                                   | WBGene00015196 | 2.51 | 5.68 | 6.63  | 4.3E-04 |
| A_12_P100435 | C46G7.1      |                                                   | WBGene00016721 | 2.51 | 5.68 | 7.01  | 3.2E-04 |
| A_12_P118128 | F27C8.4      |                                                   | WBGene00005003 | 2.51 | 5.69 | 9.60  | 5.0E-05 |
| A_12_P104086 | Y2H9A.3      | collagen [C50B6.4]                                | WBGene00000734 | 2.51 | 5.70 | 6.37  | 5.4E-04 |
| A_12_P109261 | F07E5.4      |                                                   | WBGene00017209 | 2.51 | 5.71 | 7.72  | 1.8E-04 |
| A_12_P110523 | F28H1.4      |                                                   | WBGene00017909 | 2.52 | 5.74 | 6.53  | 4.7E-04 |
| A_12_P105512 | F40F4.2      | fatty acid-binding protein [F40F4.2]              | WBGene00002254 | 2.52 | 5.75 | 5.78  | 9.4E-04 |
| A_12_P113235 | Y57A10C.6    | 3-keto-acyl-CoA thiolase [Y57A10C.6]              | WBGene00013284 | 2.52 | 5.75 | 7.28  | 2.5E-04 |
| A_12_P111785 | F52E1.5      |                                                   | WBGene00044696 | 2.53 | 5.79 | 7.95  | 1.5E-04 |
| A_12_P103329 | C17F4.7.1    |                                                   | WBGene00015913 | 2.54 | 5.81 | 5.88  | 8.5E-04 |
| A_12_P120280 | T01C8.2      |                                                   | WBGene00020143 | 2.54 | 5.81 | 7.44  | 2.2E-04 |
| A_12_P104535 | Y57A10A.23.1 |                                                   | WBGene00013263 | 2.54 | 5.83 | 10.25 | 3.3E-05 |
| A_12_P109203 | Y5F2A.1.2    | Transthyretin-like family [Y5F2A.1.2]             | WBGene00012382 | 2.54 | 5.84 | 10.18 | 3.5E-05 |
| A_12_P118581 | T22H2.6b     | granulin precursor [T22H2.6a]                     | WBGene00011936 | 2.55 | 5.85 | 7.05  | 3.1E-04 |
| A_12_P111843 | Y17D7B.4.1   |                                                   | WBGene00012452 | 2.55 | 5.87 | 7.52  | 2.1E-04 |
| A_12_P110590 | F35E8.8      | glutathione S-transferase [F35E8.8]               | WBGene00001786 | 2.55 | 5.87 | 10.65 | 2.6E-05 |
| A_12_P119252 | ZK550.6.1    |                                                   | WBGene00014000 | 2.55 | 5.87 | 6.59  | 4.5E-04 |
| A_12_P112283 | C06A8.3      | 17k antigen (O. volvulus) [C06A8.3]               | WBGene00015514 | 2.56 | 5.88 | 8.43  | 1.1E-04 |
| A_12_P106680 | Y41C4A.18    |                                                   | WBGene00012761 | 2.56 | 5.89 | 7.18  | 2.8E-04 |
| A_12_P116161 | F21H7.5      |                                                   | WBGene00009031 | 2.56 | 5.90 | 6.66  | 4.2E-04 |
| A_12_P116582 | F59A1.10     |                                                   | WBGene00010296 | 2.57 | 5.92 | 7.24  | 2.6E-04 |
| A_12_P119824 | C18E9.9.1    |                                                   | WBGene00007689 | 2.57 | 5.93 | 11.45 | 1.7E-05 |
| A_12_P112830 | Y39B6A.5     |                                                   | WBGene00012668 | 2.57 | 5.93 | 6.80  | 3.8E-04 |
| A_12_P101637 | F53A9.8      |                                                   | WBGene00018731 | 2.57 | 5.95 | 15.90 | 2.2E-06 |
| A_12_P111966 | C39E9.10.1   | tetracycline resistance protein like [C39E9.10.1] | WBGene00008033 | 2.57 | 5.96 | 6.56  | 4.6E-04 |
| A_12_P103533 | R09B5.9      |                                                   | WBGene00000558 | 2.57 | 5.96 | 12.69 | 9.0E-06 |
| A_12_P106029 | A_12_P106029 |                                                   | WBGene00014886 | 2.58 | 5.96 | 8.98  | 7.4E-05 |
| A_12_P119214 | T21H3.1      |                                                   | WBGene00020662 | 2.58 | 5.97 | 7.73  | 1.8E-04 |
| A_12_P108149 | ZK721.2      | troponin I [ZK721.2]                              | WBGene00006764 | 2.58 | 5.98 | 7.69  | 1.9E-04 |
| A_12_P118071 | Y66A7A.6.1   | Glycosyl transferases [Y66A7A.6.1]                | WBGene00001633 | 2.58 | 5.98 | 8.20  | 1.3E-04 |
| A_12_P102545 | Y106G6H.13   |                                                   | WBGene00013723 | 2.58 | 6.00 | 6.95  | 3.3E-04 |
| A_12_P106156 | ZK84.5       |                                                   | WBGene00022652 | 2.59 | 6.01 | 9.24  | 6.2E-05 |
| A_12_P105749 | F08F1.4a     |                                                   | WBGene00017258 | 2.59 | 6.02 | 8.87  | 7.9E-05 |
| A_12_P101460 | F46B3.4      | Transthyretin-like family [F46B3.4]               | WBGene00009759 | 2.59 | 6.02 | 6.95  | 3.3E-04 |
| A_12_P112617 | ZK512.7      |                                                   | WBGene00013986 | 2.59 | 6.03 | 5.88  | 8.5E-04 |
| A_12_P108555 | C35B1.5.2    |                                                   | WBGene00016435 | 2.59 | 6.04 | 6.84  | 3.6E-04 |
| A_12_P116310 | K03H1.1      | Glutamine synthetase [K03H1.1]                    | WBGene00001603 | 2.60 | 6.05 | 8.35  | 1.1E-04 |
| A_12_P104387 | VZK822L.1.2  | acyl-CoA desaturase [VZK822L.1.2]                 | WBGene00001398 | 2.60 | 6.06 | 9.50  | 5.3E-05 |
| A_12_P114835 | T24C4.4      |                                                   | WBGene00020760 | 2.60 | 6.07 | 10.63 | 2.7E-05 |
| A_12_P103246 | F55C10.2     | collagen [F55C10.2]                               | WBGene00000727 | 2.61 | 6.09 | 6.56  | 4.6E-04 |
| A_12_P120298 | F56D6.2      |                                                   | WBGene00018971 | 2.61 | 6.09 | 9.65  | 4.8E-05 |
| A_12_P104436 | Y54E10A.17   |                                                   | WBGene00021835 | 2.61 | 6.11 | 5.89  | 8.4E-04 |
| A_12_P113148 | C12D8.14     |                                                   | WBGene00007541 | 2.61 | 6.12 | 8.11  | 1.4E-04 |

Bukhari et al, Supplemental Table 1

|              |              |                                           |                |      |      |       |         |
|--------------|--------------|-------------------------------------------|----------------|------|------|-------|---------|
| A_12_P116217 | W02D9.7      |                                           | WBGene00012213 | 2.61 | 6.12 | 9.67  | 4.7E-05 |
| A_12_P119659 | T05A7.4.1    | nuclear phosphoprotein (weak) [T05A7.4.1] | WBGene00001976 | 2.62 | 6.13 | 6.25  | 6.1E-04 |
| A_12_P112371 | C31H2.2      | collagen alpha (weak) [C31H2.2]           | WBGene00001070 | 2.63 | 6.18 | 6.30  | 5.8E-04 |
| A_12_P117626 | F55B11.4.1   |                                           | WBGene00010086 | 2.63 | 6.21 | 8.15  | 1.3E-04 |
| A_12_P103080 | T28B4.3.1    |                                           | WBGene00020886 | 2.64 | 6.21 | 14.09 | 4.7E-06 |
| A_12_P108557 | R09B5.3.2    |                                           | WBGene00000556 | 2.64 | 6.22 | 15.60 | 2.5E-06 |
| A_12_P115325 | W03D8.10     |                                           | WBGene00020991 | 2.64 | 6.23 | 8.66  | 9.2E-05 |
| A_12_P109584 | T08A9.12     |                                           | WBGene00004987 | 2.65 | 6.26 | 10.46 | 2.9E-05 |
| A_12_P114863 | T08G5.10     |                                           | WBGene00003474 | 2.65 | 6.28 | 7.08  | 3.0E-04 |
| A_12_P113803 | K09H9.3      | cuticular collagen [K09H9.3]              | WBGene00000626 | 2.66 | 6.30 | 5.85  | 8.8E-04 |
| A_12_P116464 | F09C8.1      | phospholipase precursor [F09C8.1]         | WBGene00008621 | 2.66 | 6.31 | 8.21  | 1.3E-04 |
| A_12_P113071 | Y71H2B.4     |                                           | WBGene00022194 | 2.68 | 6.43 | 8.34  | 1.1E-04 |
| A_12_P104077 | F23F12.12    |                                           | WBGene00017756 | 2.69 | 6.47 | 7.08  | 3.0E-04 |
| A_12_P101826 | R102.2.2     |                                           | WBGene00011289 | 2.70 | 6.48 | 8.01  | 1.5E-04 |
| A_12_P109191 | C29F7.3      | uridylylase kinase [C29F7.3]              | WBGene00007812 | 2.70 | 6.49 | 6.16  | 6.6E-04 |
| A_12_P120300 | F19C7.1      |                                           | WBGene00017591 | 2.70 | 6.50 | 8.65  | 9.3E-05 |
| A_12_P112590 | ZK1307.1a    |                                           | WBGene00014244 | 2.70 | 6.51 | 8.56  | 9.8E-05 |
| A_12_P102049 | C15C8.3.1    | cathepsin-like protease [C15C8.3.1]       | WBGene00007605 | 2.70 | 6.51 | 6.25  | 6.0E-04 |
| A_12_P116775 | Y39B6A.20.2  |                                           | WBGene00000214 | 2.71 | 6.52 | 6.55  | 4.7E-04 |
| A_12_P103349 | D1037.3.2    | ferritin [D1037.3.2]                      | WBGene00001501 | 2.71 | 6.55 | 8.07  | 1.4E-04 |
| A_12_P109570 | T25C8.2.1    | Actins [T25C8.2.1]                        | WBGene00000067 | 2.71 | 6.55 | 7.54  | 2.1E-04 |
| A_12_P112641 | F46G10.1     |                                           | WBGene00009796 | 2.71 | 6.55 | 9.64  | 4.8E-05 |
| A_12_P101649 | Y62E10A.4    |                                           | WBGene00013375 | 2.71 | 6.55 | 6.39  | 5.3E-04 |
| A_12_P106697 | W03D8.10     |                                           | WBGene00020990 | 2.71 | 6.56 | 7.75  | 1.8E-04 |
| A_12_P116585 | B0213.6      |                                           | WBGene00003769 | 2.72 | 6.60 | 11.56 | 1.6E-05 |
| A_12_P110158 | Y34B4A.5     |                                           | WBGene00021321 | 2.73 | 6.62 | 7.42  | 2.3E-04 |
| A_12_P101667 | Y102A11A.5   |                                           | WBGene00022415 | 2.73 | 6.63 | 8.35  | 1.1E-04 |
| A_12_P100741 | A_12_P100741 |                                           | WBGene00011229 | 2.73 | 6.65 | 7.12  | 2.9E-04 |
| A_12_P115785 | R10E9.2      |                                           | WBGene00011214 | 2.73 | 6.65 | 5.81  | 9.1E-04 |
| A_12_P112262 | T06G6.6      |                                           | WBGene00011548 | 2.74 | 6.66 | 9.21  | 6.4E-05 |
| A_12_P111365 | K06A5.2      |                                           | WBGene00019430 | 2.74 | 6.68 | 6.76  | 3.9E-04 |
| A_12_P100104 | B0213.3      |                                           | WBGene00003766 | 2.74 | 6.68 | 8.22  | 1.3E-04 |
| A_12_P110765 | Y45F10C.2    |                                           | WBGene00012878 | 2.74 | 6.70 | 14.31 | 4.3E-06 |
| A_12_P112469 | C08F11.11    |                                           | WBGene00007458 | 2.74 | 6.70 | 9.85  | 4.2E-05 |
| A_12_P109752 | F56C9.7.1    |                                           | WBGene00018951 | 2.75 | 6.71 | 7.72  | 1.8E-04 |
| A_12_P113213 | Y75B8A.20    |                                           | WBGene00001724 | 2.75 | 6.71 | 6.88  | 3.5E-04 |
| A_12_P112544 | Y41C4A.11    | WD domain, G-beta repeat [Y41C4A.11]      | WBGene00012757 | 2.75 | 6.73 | 8.87  | 8.0E-05 |
| A_12_P118120 | Y65B4BR.6a   |                                           | WBGene00001725 | 2.75 | 6.74 | 8.11  | 1.4E-04 |
| A_12_P113975 | C08F11.12    |                                           | WBGene00007459 | 2.76 | 6.75 | 14.64 | 3.7E-06 |
| A_12_P102362 | C35B1.4      |                                           | WBGene00016434 | 2.76 | 6.78 | 8.19  | 1.3E-04 |
| A_12_P119578 | F09B12.3.4   |                                           | WBGene00008607 | 2.77 | 6.80 | 17.51 | 1.2E-06 |
| A_12_P120249 | F56D1.6      | calcium binding protein (weak) [F56D1.6]  | WBGene00023407 | 2.77 | 6.83 | 7.16  | 2.8E-04 |
| A_12_P114776 | F27E5.1      |                                           | WBGene00009192 | 2.78 | 6.85 | 7.92  | 1.6E-04 |
| A_12_P101861 | T19C4.7      |                                           | WBGene00003771 | 2.78 | 6.86 | 7.25  | 2.6E-04 |
| A_12_P111718 | F54C9.3.1    |                                           | WBGene00010041 | 2.78 | 6.86 | 6.72  | 4.0E-04 |
| A_12_P115665 | Y51F10.7     |                                           | WBGene00021768 | 2.78 | 6.86 | 7.12  | 2.9E-04 |
| A_12_P109572 | T14B4.6      |                                           | WBGene00001064 | 2.78 | 6.87 | 6.91  | 3.4E-04 |
| A_12_P108952 | K09F5.3a.1   |                                           | WBGene00004999 | 2.78 | 6.87 | 7.01  | 3.2E-04 |
| A_12_P104743 | F21F8.3.2    | protease [F21F8.3.2]                      | WBGene00000218 | 2.78 | 6.88 | 8.87  | 7.9E-05 |
| A_12_P106173 | F25B4.8b     |                                           | WBGene00017771 | 2.78 | 6.88 | 7.85  | 1.6E-04 |
| A_12_P115477 | R07B1.10.2   | galactin domain [R07B1.10.2]              | WBGene00002271 | 2.79 | 6.89 | 9.22  | 6.3E-05 |
| A_12_P118131 | C10G8.4      |                                           | WBGene00015683 | 2.79 | 6.90 | 8.71  | 8.9E-05 |
| A_12_P109778 | T19B10.2.2   |                                           | WBGene00011831 | 2.79 | 6.92 | 9.63  | 4.8E-05 |
| A_12_P114083 | F42A10.7.1   |                                           | WBGene00018343 | 2.79 | 6.92 | 8.87  | 7.9E-05 |
| A_12_P101084 | W08A12.2     |                                           | WBGene00021079 | 2.80 | 6.95 | 7.54  | 2.1E-04 |
| A_12_P119369 | T20D3.2      |                                           | WBGene00011856 | 2.80 | 6.96 | 8.29  | 1.2E-04 |
| A_12_P103543 | T06E4.6      | collagen [T06E4.6]                        | WBGene00000719 | 2.80 | 6.97 | 10.45 | 3.0E-05 |
| A_12_P100831 | C05B5.8      |                                           | WBGene00007324 | 2.81 | 7.02 | 11.59 | 1.6E-05 |
| A_12_P106286 | F13D12.6.1   | serine carboxypeptidase [F13D12.6.1]      | WBGene00008741 | 2.82 | 7.06 | 8.86  | 8.0E-05 |
| A_12_P104516 | H34I24.2     |                                           | WBGene00019261 | 2.82 | 7.07 | 9.27  | 6.1E-05 |
| A_12_P106692 | T28H11.7     |                                           | WBGene00020905 | 2.82 | 7.07 | 5.98  | 7.8E-04 |
| A_12_P101589 | T02E9.2      |                                           | WBGene00001716 | 2.82 | 7.09 | 10.01 | 3.8E-05 |
| A_12_P118144 | T16A9.5      |                                           | WBGene00011795 | 2.83 | 7.11 | 7.53  | 2.1E-04 |
| A_12_P120307 | ZC373.7      | cuticular collagen [ZC373.7]              | WBGene00000749 | 2.83 | 7.12 | 11.82 | 1.4E-05 |
| A_12_P109238 | LLC1.2       |                                           | WBGene00010793 | 2.83 | 7.13 | 7.99  | 1.5E-04 |

Bukhari et al, Supplemental Table 1

|              |              |                                                                                          |                |      |      |       |         |
|--------------|--------------|------------------------------------------------------------------------------------------|----------------|------|------|-------|---------|
| A_12_P100855 | ZK6.10       |                                                                                          | WBGene00022644 | 2.84 | 7.14 | 13.25 | 6.9E-06 |
| A_12_P106368 | C29F4.1      | collagen [C29F4.1]                                                                       | WBGene00000699 | 2.84 | 7.14 | 12.98 | 7.8E-06 |
| A_12_P117302 | F26F4.2      |                                                                                          | WBGene00000512 | 2.84 | 7.15 | 7.04  | 3.1E-04 |
| A_12_P117734 | F53F1.5      | cuticlin [F53F1.5]                                                                       | WBGene00009983 | 2.84 | 7.16 | 10.13 | 3.6E-05 |
| A_12_P102704 | C04F12.9     |                                                                                          | WBGene00007303 | 2.84 | 7.17 | 9.09  | 6.9E-05 |
| A_12_P110934 | F55D10.2.2   | Ribosomal protein L23 [F55D10.2.2]                                                       | WBGene00004438 | 2.85 | 7.23 | 7.56  | 2.1E-04 |
| A_12_P103393 | A_12_P103393 |                                                                                          | WBGene00014307 | 2.86 | 7.26 | 5.93  | 8.2E-04 |
| A_12_P115669 | F14H12.1     | cuticular collagen [F14H12.1]                                                            | WBGene00000738 | 2.87 | 7.33 | 8.02  | 1.4E-04 |
| A_12_P115167 | B0213.17     |                                                                                          | WBGene00015046 | 2.88 | 7.34 | 12.57 | 9.6E-06 |
| A_12_P115757 | M60.4b.2     |                                                                                          | WBGene00019780 | 2.89 | 7.42 | 16.05 | 2.1E-06 |
| A_12_P113578 | F11C7.5      |                                                                                          | WBGene00003891 | 2.89 | 7.42 | 10.74 | 2.5E-05 |
| A_12_P109950 | Y105E8A.4.2  |                                                                                          | WBGene00001156 | 2.89 | 7.43 | 7.00  | 3.2E-04 |
| A_12_P109464 | C34F11.2     |                                                                                          | WBGene00016414 | 2.91 | 7.49 | 7.41  | 2.3E-04 |
| A_12_P117690 | ZK1320.2.1   |                                                                                          | WBGene00014252 | 2.91 | 7.49 | 9.10  | 6.8E-05 |
| A_12_P114274 | F07D10.1.2   | ribosomal protein [F07D10.1.2]                                                           | WBGene00004423 | 2.91 | 7.50 | 6.23  | 6.2E-04 |
| A_12_P117692 | W05E7.1      |                                                                                          | WBGene00001692 | 2.91 | 7.52 | 6.14  | 6.7E-04 |
| A_12_P116497 | Y1A5A.1      | LIM domain containing proteins (2 domains) [Y1A5A.1]                                     | WBGene00012379 | 2.92 | 7.59 | 12.68 | 9.0E-06 |
| A_12_P108384 | F40F4.3      | fatty acid-binding protein [F40F4.3]                                                     | WBGene00002253 | 2.93 | 7.62 | 7.49  | 2.2E-04 |
| A_12_P107711 | Y51A2D.14    |                                                                                          | WBGene00013081 | 2.93 | 7.62 | 8.20  | 1.3E-04 |
| A_12_P113109 | C33H5.13     |                                                                                          | WBGene00016379 | 2.93 | 7.64 | 6.51  | 4.8E-04 |
| A_12_P103873 | F11G11.12    | collagen [F11G11.12]                                                                     | WBGene00000649 | 2.94 | 7.67 | 5.91  | 8.3E-04 |
| A_12_P110001 | F54D5.3      |                                                                                          | WBGene00010049 | 2.95 | 7.71 | 9.74  | 4.5E-05 |
| A_12_P102941 | K11D2.2      | Human PHP32 protein like [K11D2.2]                                                       | WBGene00010769 | 2.95 | 7.71 | 7.50  | 2.1E-04 |
| A_12_P105520 | K02E2.4      |                                                                                          | WBGene00002118 | 2.95 | 7.74 | 9.70  | 4.7E-05 |
| A_12_P118372 | F35C5.9      | Lectin C-type domain short and long forms, von Willebrand factor type A domain [F35C5.9] | WBGene00009397 | 2.97 | 7.83 | 11.34 | 1.8E-05 |
| A_12_P119073 | W01F3.2      |                                                                                          | WBGene00012185 | 2.97 | 7.84 | 11.66 | 1.5E-05 |
| A_12_P103904 | F01D5.3      |                                                                                          | WBGene00008494 | 2.97 | 7.85 | 12.84 | 8.4E-06 |
| A_12_P114388 | C02B10.6     |                                                                                          | WBGene00018124 | 2.98 | 7.89 | 10.47 | 2.9E-05 |
| A_12_P118738 | K01D12.9     |                                                                                          | WBGene00010468 | 2.98 | 7.91 | 14.49 | 3.9E-06 |
| A_12_P100781 | B0334.1.2    | Transthyretin-like family [B0334.1.2]                                                    | WBGene00007142 | 2.99 | 7.94 | 10.63 | 2.7E-05 |
| A_12_P115702 | W03F11.1     |                                                                                          | WBGene00021005 | 2.99 | 7.96 | 10.51 | 2.9E-05 |
| A_12_P115235 | Y46G5A.20    |                                                                                          | WBGene00012910 | 3.00 | 7.99 | 14.45 | 4.0E-06 |
| A_12_P116911 | F11G11.10.2  | collagen [F11G11.10.2]                                                                   | WBGene00000606 | 3.00 | 8.00 | 9.70  | 4.6E-05 |
| A_12_P115971 | ZK6.11b      |                                                                                          | WBGene00022645 | 3.00 | 8.01 | 11.03 | 2.1E-05 |
| A_12_P103953 | C32E8.4      |                                                                                          | WBGene00016322 | 3.00 | 8.01 | 7.23  | 2.7E-04 |
| A_12_P103236 | A_12_P103236 |                                                                                          | WBGene00017058 | 3.00 | 8.02 | 8.39  | 1.1E-04 |
| A_12_P112124 | C53C11.2     |                                                                                          | WBGene00016900 | 3.00 | 8.03 | 8.34  | 1.2E-04 |
| A_12_P102036 | B0213.5      |                                                                                          | WBGene00003768 | 3.01 | 8.04 | 10.23 | 3.4E-05 |
| A_12_P107228 | F56B3.1      |                                                                                          | WBGene00000677 | 3.01 | 8.07 | 5.73  | 9.8E-04 |
| A_12_P116259 | T13A10.11b   | S-adenosylmethionine synthetase [T13A10.11a.1]                                           | WBGene00006416 | 3.01 | 8.07 | 8.33  | 1.2E-04 |
| A_12_P102677 | Y69E1A.1     |                                                                                          | WBGene00013473 | 3.03 | 8.16 | 6.99  | 3.2E-04 |
| A_12_P116329 | T03F1.5      | serine/threonine protein phosphatase PP1 [T03F1.5]                                       | WBGene00020187 | 3.04 | 8.21 | 7.73  | 1.8E-04 |
| A_12_P103276 | F36H12.8     |                                                                                          | WBGene00023030 | 3.04 | 8.21 | 9.21  | 6.3E-05 |
| A_12_P100096 | F54D5.4      |                                                                                          | WBGene00010050 | 3.04 | 8.22 | 8.43  | 1.1E-04 |
| A_12_P119232 | C04H5.2      |                                                                                          | WBGene00007313 | 3.05 | 8.26 | 11.31 | 1.8E-05 |
| A_12_P104334 | T01D3.6b     | EGF-like domain, Fibrinogen beta and gamma chains, C-terminal globular domain [T01D3.6b] | WBGene00011330 | 3.05 | 8.30 | 10.03 | 3.8E-05 |
| A_12_P115192 | Y34B4A.9     |                                                                                          | WBGene00021325 | 3.06 | 8.35 | 7.79  | 1.7E-04 |
| A_12_P103007 | C52D10.13    | cuticular collagen [C52D10.13]                                                           | WBGene00000711 | 3.07 | 8.40 | 5.80  | 9.2E-04 |
| A_12_P117963 | F37B1.1      | glutathione S-transferase [F37B1.1]                                                      | WBGene00001772 | 3.07 | 8.42 | 9.63  | 4.9E-05 |
| A_12_P108875 | W01A11.4     | galaptin (S-lectin) [W01A11.4]                                                           | WBGene00002273 | 3.08 | 8.47 | 10.94 | 2.2E-05 |
| A_12_P107821 | ZK849.6      |                                                                                          | WBGene00014104 | 3.09 | 8.50 | 6.91  | 3.4E-04 |
| A_12_P101238 | R13H9.5      |                                                                                          | WBGene00020071 | 3.09 | 8.51 | 9.79  | 4.4E-05 |
| A_12_P104069 | K10C2.3      | aspartyl protease [K10C2.3]                                                              | WBGene00019619 | 3.09 | 8.52 | 10.68 | 2.6E-05 |
| A_12_P107172 | ZK6.7b       | lipase [ZK6.7a]                                                                          | WBGene00022642 | 3.09 | 8.54 | 7.66  | 1.9E-04 |
| A_12_P117224 | R09B5.8      |                                                                                          | WBGene00000557 | 3.10 | 8.57 | 8.63  | 9.4E-05 |
| A_12_P119476 | F46F5.6      |                                                                                          | WBGene00018497 | 3.10 | 8.57 | 9.47  | 5.4E-05 |
| A_12_P114326 | F57B1.4.1    | collagen [F57B1.4.1]                                                                     | WBGene00000733 | 3.10 | 8.59 | 6.02  | 7.5E-04 |
| A_12_P106149 | Y69H2.14.2   |                                                                                          | WBGene00013489 | 3.11 | 8.64 | 6.14  | 6.7E-04 |
| A_12_P104675 | T28H11.1     |                                                                                          | WBGene00006053 | 3.11 | 8.65 | 7.02  | 3.1E-04 |
| A_12_P119811 | M195.1       | cuticle collagen [M195.1]                                                                | WBGene00000653 | 3.11 | 8.66 | 7.43  | 2.3E-04 |
| A_12_P105867 | C17G10.5.2   |                                                                                          | WBGene00003097 | 3.12 | 8.71 | 8.42  | 1.1E-04 |
| A_12_P102963 | F36A2.10     |                                                                                          | WBGene00009457 | 3.13 | 8.77 | 7.01  | 3.2E-04 |
| A_12_P112063 | Y39B6A.24.2  |                                                                                          | WBGene00012683 | 3.13 | 8.77 | 14.93 | 3.3E-06 |
| A_12_P105240 | F26B1.4      |                                                                                          | WBGene00000634 | 3.13 | 8.78 | 16.51 | 1.7E-06 |
| A_12_P108563 | F52H3.6      | serine/threonine specific protein phosphatase [F52H3.6]                                  | WBGene00009948 | 3.14 | 8.79 | 6.23  | 6.2E-04 |

Bukhari et al, Supplemental Table 1

|              |              |                                                    |                |      |       |       |         |
|--------------|--------------|----------------------------------------------------|----------------|------|-------|-------|---------|
| A_12_P117478 | C32H11.4     |                                                    | WBGene00007867 | 3.14 | 8.83  | 14.87 | 3.4E-06 |
| A_12_P107595 | Y37A18.7     |                                                    | WBGene00012540 | 3.15 | 8.86  | 17.96 | 1.0E-06 |
| A_12_P113765 | F13H10.6     |                                                    | WBGene00008777 | 3.16 | 8.92  | 7.05  | 3.1E-04 |
| A_12_P119192 | T08A9.9a     |                                                    | WBGene00004990 | 3.16 | 8.93  | 9.02  | 7.2E-05 |
| A_12_P106339 | F49E11.10    | testis-specific protein TPX-1 like [F49E11.10]     | WBGene00009895 | 3.16 | 8.94  | 11.74 | 1.5E-05 |
| A_12_P119545 | K03H1.4      | Transthyretin-like family [K03H1.4]                | WBGene00010539 | 3.16 | 8.94  | 12.62 | 9.3E-06 |
| A_12_P104581 | C14C6.2      |                                                    | WBGene00015756 | 3.18 | 9.04  | 9.78  | 4.4E-05 |
| A_12_P119844 | F28H7.3      | lipase [F28H7.3]                                   | WBGene00009237 | 3.18 | 9.07  | 7.73  | 1.8E-04 |
| A_12_P102409 | F36H12.8     |                                                    | WBGene00018122 | 3.19 | 9.12  | 10.16 | 3.5E-05 |
| A_12_P108319 | F22H10.3.1   |                                                    | WBGene00017727 | 3.19 | 9.14  | 7.32  | 2.5E-04 |
| A_12_P109434 | C10G11.9     |                                                    | WBGene00015689 | 3.20 | 9.18  | 6.86  | 3.6E-04 |
| A_12_P109977 | A_12_P109977 |                                                    | WBGene00008590 | 3.20 | 9.21  | 7.23  | 2.6E-04 |
| A_12_P113470 | F41E7.4      |                                                    | WBGene00009620 | 3.20 | 9.22  | 8.64  | 9.3E-05 |
| A_12_P107047 | T10E10.5     | collagen [T10E10.5]                                | WBGene00000742 | 3.21 | 9.22  | 17.63 | 1.2E-06 |
| A_12_P114293 | ZK938.1      | serine/threonine protein phosphatase [ZK938.1]     | WBGene00014158 | 3.21 | 9.28  | 6.04  | 7.3E-04 |
| A_12_P119922 | K07A1.6      |                                                    | WBGene00010613 | 3.25 | 9.49  | 7.71  | 1.8E-04 |
| A_12_P108376 | Y34B4A.6     |                                                    | WBGene00021322 | 3.26 | 9.58  | 7.56  | 2.0E-04 |
| A_12_P101951 | Y119D38.21   |                                                    | WBGene00022497 | 3.26 | 9.59  | 7.29  | 2.5E-04 |
| A_12_P100318 | T08A9.7.1    |                                                    | WBGene00004988 | 3.27 | 9.62  | 7.14  | 2.8E-04 |
| A_12_P100439 | C17F3.1      |                                                    | WBGene00015907 | 3.28 | 9.72  | 6.24  | 6.1E-04 |
| A_12_P108088 | EGAP7.1.1    | cuticular collagen [EGAP7.1.1]                     | WBGene00001065 | 3.29 | 9.75  | 6.76  | 3.9E-04 |
| A_12_P102118 | C09F12.1     |                                                    | WBGene00000522 | 3.29 | 9.77  | 8.73  | 8.8E-05 |
| A_12_P120200 | Y22D7AR.10   |                                                    | WBGene00021263 | 3.29 | 9.80  | 12.30 | 1.1E-05 |
| A_12_P108963 | F53F1.4      | cuticlin [F53F1.4]                                 | WBGene00009982 | 3.30 | 9.85  | 6.43  | 5.2E-04 |
| A_12_P112836 | T07C4.4.1    |                                                    | WBGene00004986 | 3.30 | 9.85  | 6.47  | 5.0E-04 |
| A_12_P107245 | K11H12.6     |                                                    | WBGene00019662 | 3.30 | 9.86  | 11.41 | 1.7E-05 |
| A_12_P109198 | C02A12.4.1   |                                                    | WBGene00003096 | 3.30 | 9.86  | 8.16  | 1.3E-04 |
| A_12_P100460 | F42E8.2      |                                                    | WBGene00009631 | 3.31 | 9.89  | 7.61  | 2.0E-04 |
| A_12_P113231 | Y37H2A.11    |                                                    | WBGene00004516 | 3.31 | 9.93  | 9.06  | 7.0E-05 |
| A_12_P119272 | F28H1.2      | calponin [F28H1.2]                                 | WBGene00000779 | 3.31 | 9.94  | 8.62  | 9.4E-05 |
| A_12_P115592 | C12D8.16     |                                                    | WBGene00007543 | 3.31 | 9.94  | 8.65  | 9.3E-05 |
| A_12_P109497 | A_12_P109497 |                                                    | WBGene00013858 | 3.32 | 10.01 | 6.12  | 4.6E-04 |
| A_12_P103897 | Y38C1BA.3    | collagen [Y38C1BA.3]                               | WBGene00000683 | 3.34 | 10.13 | 7.01  | 3.2E-04 |
| A_12_P105856 | E01G4.6      |                                                    | WBGene00008448 | 3.37 | 10.31 | 5.93  | 8.1E-04 |
| A_12_P103949 | R12E2.15     |                                                    | WBGene00020040 | 3.38 | 10.38 | 11.39 | 1.8E-05 |
| A_12_P104959 | F10C1.3      |                                                    | WBGene00017325 | 3.38 | 10.39 | 7.77  | 1.7E-04 |
| A_12_P114862 | F14F7.1.1    | collagen [F14F7.1.1]                               | WBGene00000673 | 3.38 | 10.41 | 5.84  | 8.8E-04 |
| A_12_P101113 | F15B9.1      | O.volvulus antigen peptide like [F15B9.1]          | WBGene00001387 | 3.39 | 10.48 | 14.07 | 4.8E-06 |
| A_12_P110481 | C17H12.8     |                                                    | WBGene00015933 | 3.42 | 10.69 | 13.11 | 7.4E-06 |
| A_12_P105493 | F41E6.2      |                                                    | WBGene00001694 | 3.42 | 10.72 | 6.13  | 6.8E-04 |
| A_12_P100952 | Y22F5A.4.2   |                                                    | WBGene00003090 | 3.43 | 10.77 | 9.95  | 4.0E-05 |
| A_12_P102590 | F57B1.3      | collagen [F57B1.3]                                 | WBGene00000732 | 3.43 | 10.77 | 6.08  | 7.1E-04 |
| A_12_P108634 | F09D12.1     |                                                    | WBGene00001699 | 3.44 | 10.86 | 8.02  | 1.5E-04 |
| A_12_P102460 | F31E9.6      |                                                    | WBGene00009299 | 3.46 | 10.98 | 15.36 | 2.7E-06 |
| A_12_P108858 | W09C3.6      | serine/threonine protein phosphatase PP1 [W09C3.6] | WBGene00021113 | 3.47 | 11.05 | 6.66  | 4.2E-04 |
| A_12_P118104 | K06A4.7      |                                                    | WBGene00010597 | 3.47 | 11.07 | 7.28  | 2.5E-04 |
| A_12_P120339 | W06D12.3     | Fatty acid desaturase [W06D12.3]                   | WBGene00001397 | 3.48 | 11.12 | 11.40 | 1.7E-05 |
| A_12_P109188 | Y67D8C.8     |                                                    | WBGene00022072 | 3.48 | 11.15 | 6.70  | 4.1E-04 |
| A_12_P117898 | C15C6.2b     |                                                    | WBGene00007601 | 3.48 | 11.16 | 7.23  | 2.6E-04 |
| A_12_P116634 | R06B10.3     |                                                    | WBGene00019914 | 3.49 | 11.20 | 6.34  | 5.6E-04 |
| A_12_P104867 | F32B5.4      |                                                    | WBGene00017978 | 3.50 | 11.30 | 6.75  | 3.9E-04 |
| A_12_P114232 | H36L18.2.2   |                                                    | WBGene00010424 | 3.50 | 11.31 | 6.29  | 5.9E-04 |
| A_12_P107260 | F01D5.1      |                                                    | WBGene00008492 | 3.51 | 11.39 | 14.59 | 3.8E-06 |
| A_12_P100367 | W02D9.5      |                                                    | WBGene00012211 | 3.51 | 11.42 | 8.33  | 1.2E-04 |
| A_12_P108704 | Y119D38.13   |                                                    | WBGene00022490 | 3.56 | 11.79 | 6.75  | 3.9E-04 |
| A_12_P112393 | A_12_P112393 |                                                    | WBGene00013887 | 3.56 | 11.81 | 7.98  | 1.5E-04 |
| A_12_P104091 | C55C2.2      |                                                    | WBGene00006047 | 3.57 | 11.84 | 8.94  | 7.6E-05 |
| A_12_P101154 | Y55B1AR.1.1  |                                                    | WBGene00002269 | 3.58 | 11.92 | 7.97  | 1.5E-04 |
| A_12_P102906 | T27C10.7     |                                                    | WBGene00020860 | 3.58 | 11.96 | 7.77  | 1.7E-04 |
| A_12_P114725 | F34D10.8     |                                                    | WBGene00009377 | 3.59 | 12.02 | 6.24  | 6.1E-04 |
| A_12_P116414 | A_12_P116414 |                                                    | WBGene00012294 | 3.59 | 12.07 | 8.95  | 7.6E-05 |
| A_12_P107957 | C35D10.2     |                                                    | WBGene00016440 | 3.61 | 12.22 | 6.01  | 7.5E-04 |
| A_12_P116252 | F15H10.2     | collagen [F15H10.2]                                | WBGene00000602 | 3.61 | 12.23 | 11.89 | 1.3E-05 |
| A_12_P118663 | F17E9.5      |                                                    | WBGene00017542 | 3.67 | 12.75 | 8.29  | 1.2E-04 |
| A_12_P110327 | F15G9.1a     |                                                    | WBGene00008865 | 3.68 | 12.84 | 8.58  | 9.7E-05 |

Bukhari et al, Supplemental Table 1

|              |              |                                                                                            |                |      |       |       |         |
|--------------|--------------|--------------------------------------------------------------------------------------------|----------------|------|-------|-------|---------|
| A_12_P110403 | F11E6.3      |                                                                                            | WBGene00008707 | 3.69 | 12.88 | 6.82  | 3.7E-04 |
| A_12_P100137 | W05G11.3.1   | cuticular collagen [W05G11.3.1]                                                            | WBGene00000663 | 3.69 | 12.89 | 9.08  | 6.9E-05 |
| A_12_P104810 | M02H5.8      |                                                                                            | WBGene00019744 | 3.71 | 13.05 | 10.67 | 2.6E-05 |
| A_12_P102463 | C04F12.7     |                                                                                            | WBGene00018315 | 3.72 | 13.17 | 6.33  | 5.6E-04 |
| A_12_P107544 | M03A1.7      |                                                                                            | WBGene00000928 | 3.73 | 13.26 | 9.89  | 4.1E-05 |
| A_12_P116174 | C02E7.6.1    |                                                                                            | WBGene00015339 | 3.77 | 13.68 | 7.57  | 2.0E-04 |
| A_12_P113416 | C34H4.4a     | cuticular collagen [C34H4.4a]                                                              | WBGene00000681 | 3.79 | 13.86 | 9.45  | 5.4E-05 |
| A_12_P113162 | F28D1.5      | Arabidopsis pathogenesis-related protein 5 like [F28D1.5]                                  | WBGene00009215 | 3.87 | 14.61 | 8.82  | 8.2E-05 |
| A_12_P109043 | Y22D7AL.15   |                                                                                            | WBGene00021253 | 3.88 | 14.71 | 9.36  | 5.8E-05 |
| A_12_P103274 | C04H5.7      |                                                                                            | WBGene00007315 | 3.88 | 14.74 | 10.18 | 3.5E-05 |
| A_12_P118966 | F35C5.6.1    | Lectin C-type domain short and long forms, von Willebrand factor type A domain [F35C5.6.1] | WBGene00009394 | 3.90 | 14.92 | 9.02  | 7.2E-05 |
| A_12_P108535 | C54D1.2      | C-type lectin [C54D1.2]                                                                    | WBGene00016912 | 3.93 | 15.21 | 9.28  | 6.1E-05 |
| A_12_P101207 | C18D4.6a     |                                                                                            | WBGene00007675 | 3.95 | 15.47 | 15.60 | 2.5E-06 |
| A_12_P115146 | F56A4.2      |                                                                                            | WBGene00021224 | 3.97 | 15.69 | 8.96  | 7.5E-05 |
| A_12_P107487 | Y45G12C.2    | glutathione S-transferase [Y45G12C.2]                                                      | WBGene00001758 | 4.01 | 16.16 | 8.14  | 1.3E-04 |
| A_12_P103511 | C01B12.1     | cuticular collagen [C01B12.1]                                                              | WBGene00005017 | 4.07 | 16.77 | 8.35  | 1.1E-04 |
| A_12_P116016 | F07B7.1      |                                                                                            | WBGene00021106 | 4.07 | 16.77 | 21.61 | 3.2E-07 |
| A_12_P115907 | C34D4.3      |                                                                                            | WBGene00016399 | 4.07 | 16.78 | 5.87  | 8.6E-04 |
| A_12_P117732 | H12D21.1     |                                                                                            | WBGene00013888 | 4.09 | 16.99 | 6.95  | 3.3E-04 |
| A_12_P104872 | R12E2.14     |                                                                                            | WBGene00020039 | 4.11 | 17.31 | 11.76 | 1.4E-05 |
| A_12_P104777 | F25H5.8      |                                                                                            | WBGene00009130 | 4.13 | 17.52 | 10.11 | 3.6E-05 |
| A_12_P103931 | F08G5.6      |                                                                                            | WBGene00008584 | 4.13 | 17.54 | 8.42  | 1.1E-04 |
| A_12_P115185 | F15E11.15.1  |                                                                                            | WBGene00017501 | 4.15 | 17.77 | 6.23  | 6.2E-04 |
| A_12_P106786 | C45B2.2      |                                                                                            | WBGene00016659 | 4.16 | 17.87 | 14.75 | 3.5E-06 |
| A_12_P105082 | W02D9.6      |                                                                                            | WBGene00012212 | 4.17 | 17.94 | 9.64  | 4.8E-05 |
| A_12_P104995 | Y73B6BL.34   |                                                                                            | WBGene00000686 | 4.17 | 18.04 | 5.74  | 9.7E-04 |
| A_12_P110656 | F58A6.9      | major sperm protein [F58A6.9]                                                              | WBGene00019026 | 4.19 | 18.20 | 7.61  | 2.0E-04 |
| A_12_P102236 | F08G5.4      | collagen [F08G5.4]                                                                         | WBGene00000704 | 4.21 | 18.56 | 10.31 | 3.2E-05 |
| A_12_P106508 | ZK1290.3a.1  | Cutical collagen 6, col-6 [ZK1290.3a.1]                                                    | WBGene00004398 | 4.25 | 19.02 | 9.05  | 7.1E-05 |
| A_12_P110541 | F08B4.2a     | cadherin repeat-containing protein [F08B4.2a]                                              | WBGene00000397 | 4.27 | 19.23 | 5.97  | 7.8E-04 |
| A_12_P108386 | Y38CAA.7     |                                                                                            | WBGene00021398 | 4.27 | 19.35 | 6.14  | 6.7E-04 |
| A_12_P104684 | A_12_P104684 |                                                                                            | WBGene00011134 | 4.33 | 20.07 | 7.16  | 2.8E-04 |
| A_12_P106777 | T27A3.4      |                                                                                            | WBGene00020840 | 4.34 | 20.21 | 6.16  | 6.6E-04 |
| A_12_P118118 | T01B7.7      | cuticle collagen ROL-6 [T01B7.7]                                                           | WBGene00004397 | 4.37 | 20.62 | 11.65 | 1.5E-05 |
| A_12_P111158 | F15E11.12    |                                                                                            | WBGene00017498 | 4.37 | 20.62 | 6.87  | 3.6E-04 |
| A_12_P103693 | ZK1225.6     |                                                                                            | WBGene00006048 | 4.43 | 21.59 | 7.30  | 2.5E-04 |
| A_12_P105501 | T15B7.4      | collagen [T15B7.4]                                                                         | WBGene00000715 | 4.46 | 22.08 | 6.56  | 4.6E-04 |
| A_12_P111363 | Y43F4A.3     |                                                                                            | WBGene00012798 | 4.53 | 23.06 | 18.62 | 8.2E-07 |
| A_12_P118575 | T28H11.5     |                                                                                            | WBGene00006051 | 4.60 | 24.29 | 6.15  | 6.6E-04 |
| A_12_P118410 | R06C1.4.2    | RNA recognition motif. (aka RRM, RBD, or RNP domain) [R06C1.4.2]                           | WBGene00011059 | 4.62 | 24.65 | 11.55 | 1.6E-05 |
| A_12_P110068 | Y22F5A.5     |                                                                                            | WBGene00003091 | 4.63 | 24.84 | 13.43 | 6.3E-06 |
| A_12_P107122 | K07F5.11     |                                                                                            | WBGene00006050 | 4.64 | 24.85 | 6.69  | 4.1E-04 |
| A_12_P107969 | F07B7.2      |                                                                                            | WBGene00021107 | 4.64 | 24.91 | 14.15 | 4.6E-06 |
| A_12_P115640 | F15D4.5      |                                                                                            | WBGene00008862 | 4.68 | 25.64 | 23.41 | 1.9E-07 |
| A_12_P103566 | ZC477.1      |                                                                                            | WBGene00006052 | 4.70 | 26.03 | 6.73  | 4.0E-04 |
| A_12_P103507 | C38D9.2      |                                                                                            | WBGene00008010 | 4.72 | 26.43 | 28.02 | 6.2E-08 |
| A_12_P108292 | A_12_P108292 |                                                                                            | WBGene00006039 | 4.81 | 28.05 | 5.97  | 7.8E-04 |
| A_12_P112331 | ZK836.1      | collagen [ZK836.1]                                                                         | WBGene00003057 | 4.83 | 28.39 | 10.28 | 3.3E-05 |
| A_12_P103857 | T28H11.6     |                                                                                            | WBGene00006040 | 4.84 | 28.63 | 6.11  | 6.9E-04 |
| A_12_P113469 | A_12_P113469 |                                                                                            | WBGene00012781 | 4.86 | 28.98 | 8.17  | 1.3E-04 |
| A_12_P100306 | T28C6.4      | cuticle collagen [T28C6.4]                                                                 | WBGene00000691 | 4.87 | 29.19 | 13.99 | 4.9E-06 |
| A_12_P115818 | F41F3.3.1    | cuticlin [F41F3.3.1]                                                                       | WBGene00018297 | 5.00 | 31.92 | 11.90 | 1.3E-05 |
| A_12_P118021 | F58F6.1      | cuticular collagen [F58F6.1]                                                               | WBGene00000678 | 5.00 | 31.97 | 6.96  | 3.3E-04 |
| A_12_P116101 | K05F1.2      | Major sperm protein (msp-142) [K05F1.2]                                                    | WBGene00003469 | 5.08 | 33.94 | 6.94  | 3.3E-04 |
| A_12_P120255 | K07F5.3      | major sperm protein [K07F5.3]                                                              | WBGene00003449 | 5.10 | 34.30 | 5.78  | 9.4E-04 |
| A_12_P118740 | R05F9.8      | major sperm protein [R05F9.8]                                                              | WBGene00003431 | 5.13 | 35.11 | 6.29  | 5.8E-04 |
| A_12_P116392 | C04G2.9.1    |                                                                                            | WBGene00007308 | 5.14 | 35.23 | 6.32  | 5.7E-04 |
| A_12_P102879 | T23B7.1      |                                                                                            | WBGene00020715 | 5.16 | 35.71 | 6.41  | 5.3E-04 |
| A_12_P108002 | C46A5.3      | cuticular collagen [C46A5.3]                                                               | WBGene00000603 | 5.18 | 36.25 | 11.70 | 1.5E-05 |
| A_12_P109133 | C04G2.8      |                                                                                            | WBGene00007307 | 5.19 | 36.56 | 6.00  | 7.6E-04 |
| A_12_P114398 | C24D10.7     |                                                                                            | WBGene00016058 | 5.20 | 36.79 | 6.87  | 3.6E-04 |
| A_12_P119265 | ZK484.8.1    |                                                                                            | WBGene00022754 | 5.22 | 37.36 | 6.30  | 5.8E-04 |
| A_12_P112312 | K05F1.7      | Major sperm protein [K05F1.7]                                                              | WBGene00003456 | 5.33 | 40.36 | 6.79  | 3.8E-04 |
| A_12_P109123 | C34F11.4     | major sperm protein [C34F11.4]                                                             | WBGene00003443 | 5.36 | 40.97 | 6.41  | 5.3E-04 |
| A_12_P111189 | ZK546.3      | Major sperm protein [ZK546.3]                                                              | WBGene00022760 | 5.40 | 42.09 | 6.12  | 6.8E-04 |

Bukhari et al, Supplemental Table 1

|              |              |                                      |                |      |       |       |         |
|--------------|--------------|--------------------------------------|----------------|------|-------|-------|---------|
| A_12_P103413 | R05F9.3      | major sperm protein [R05F9.3]        | WBGene00003430 | 5.43 | 43.13 | 6.51  | 4.8E-04 |
| A_12_P115887 | F11G11.8.1   |                                      | WBGene00017386 | 5.47 | 44.20 | 6.63  | 4.4E-04 |
| A_12_P101524 | B0491.2.1    | cuticle collagen SQT-1 [B0491.2.1]   | WBGene00005016 | 5.47 | 44.24 | 13.99 | 4.9E-06 |
| A_12_P100530 | A_12_P100530 |                                      | WBGene00010633 | 5.62 | 49.04 | 6.30  | 5.8E-04 |
| A_12_P106983 | T24B8.5      |                                      | WBGene00011979 | 5.63 | 49.45 | 19.25 | 6.7E-07 |
| A_12_P120059 | K08F4.8      | major sperm protein MSP-38 [K08F4.8] | WBGene00003434 | 5.69 | 51.79 | 6.29  | 5.9E-04 |
| A_12_P115280 | C35B8.1      | Cuticle collagen [C35B8.1]           | WBGene00000748 | 5.71 | 52.20 | 9.04  | 7.1E-05 |
| A_12_P112609 | C35D10.11    |                                      | WBGene00016447 | 5.71 | 52.27 | 6.62  | 4.4E-04 |
| A_12_P100591 | F27C1.8      | cuticular collagen [F27C1.8]         | WBGene00001067 | 5.83 | 56.73 | 10.41 | 3.0E-05 |
| A_12_P113025 | F30B5.1      | cuticular collagen [F30B5.1]         | WBGene00001074 | 5.89 | 59.24 | 10.83 | 2.4E-05 |
| A_12_P115014 | ZK1248.6     | Major sperm protein [ZK1248.6]       | WBGene00003457 | 6.15 | 71.14 | 6.25  | 6.1E-04 |
