# Supplementary material
Source: PubMed Central journal article supplement (PMC3367518)
Supplement: cr201231x5.pdf [file cr201231x5.pdf]

**Supplementary information, Table S2** Predictive mRNA targets of microRNAs expressed in gonads distal tip cells that are important for germline proliferation and differentiation. The mRNA level of the genes in bolds are significantly increased in gonads of *alg-1(gk214)* animals.

| microRNA          | Predicted targets by TargetScan                             | Predicted targets by miRWIP                                                                                                                                                                                                                                                                                                                                                                                |
|-------------------|-------------------------------------------------------------|------------------------------------------------------------------------------------------------------------------------------------------------------------------------------------------------------------------------------------------------------------------------------------------------------------------------------------------------------------------------------------------------------------|
| let-7             | F41E6.4; <b>T10E10.2</b> ; <b>T14B4.6</b>                   | T04D1.4; <b>F11C7.5</b> ; C04D8.1; C01G6.5; VT23B5.2; F36F2.6; <b>C43H6.3</b> ; <b>W08F4.6</b> ; <b>K03H6.2</b> ; <b>Y44A6D.2</b> ; <b>ZK822.2</b> ; F40F12.5; F55F10.1; ZK1098.3; R05D3.11; <b>C33H5.13</b> ; M70.5; ZK632.7; F40F11.2; C34G6.1; <b>T14G10.3</b> ; C25H3.8; F36A2.13; <b>C11G10.1</b> ; M03A8.2; C14C10.5; <b>ZK938.1</b> ; F59E12.9; <b>R07E4.3</b> ; T04G9.1; <b>C16D2.1</b> ; F54D5.14 |
| lin-4 and miR-237 | <b>R07E5.4</b>                                              | <b>R07E5.4</b> ; <b>W02D9.5</b>                                                                                                                                                                                                                                                                                                                                                                            |
| miR-359           | <b>F46H6.2</b>                                              | <b>F26D10.12</b> ; <b>C34E7.4</b> ; F39G3.3; <b>C18A11.2</b> ; T27E4.1; Y54F10BM.2                                                                                                                                                                                                                                                                                                                         |
| miR-247           | C34G6.1; C25H3.8; F55D12.5; <b>BE10.2</b> ; <b>Y18H1A.9</b> | C25H3.8; C34G6.1; <b>Y18H1A.9</b> ; R05D3.11; F40F12.5; <b>Y38F1A.1</b> ; F39G3.3                                                                                                                                                                                                                                                                                                                          |
